# Supplementary material
Source: PubMed Central journal article supplement (PMC2646461)
Supplement: 90276.2008_2.pdf [file 90276.2008_2.pdf]

**Supplemental table 1. RT-PCR primer sequences.**

| <i>Target gene</i> | <i>Accession</i> | <i>Primer sequence</i>                                |
|--------------------|------------------|-------------------------------------------------------|
| CBL                | AV594776         | F: CGGGTCACATACACATCAA<br>R: AGGAGGCGGTTGTCATACAC     |
| CD45               | BC148881         | F: ACGGAGATCAGGATCAAAC<br>R: AGTCTCATCCCTGGGACCTT     |
| CXCR4              | NM_174301.2      | F: AAGGCTCAGAAGCGCAAG<br>R: GAGTCGATGCTGATCCCAAT      |
| GAPDH              | AV610889         | F: TGACCCCTTCATTGACCTTC<br>R: CGTTCTCTGCCTTGACTGTG    |
| IFIT-2             | BT025389         | F: AAAGAGCTTCCTCCCGTAGC<br>R: GGATGGCCTTGTCTTCACAC    |
| MDA-5              | XM_615590        | F: TGGGACTAACAGCTTCACCA<br>R: ACTGCATCAAGATTGGCACA    |
| OAS-1              | CK960499.1       | F: AAGGGTGGCTCCTCAGGCAA<br>R: GTCAACTGACCCAGGGCATC    |
| RIG-I              | DQ471980         | F: ACGTGGCAGAACAATCAGA<br>R: TCTGGTTGAACCCTGACTGA     |
| ZAP-70             | CB451376         | F: CTGCAAAGATTGACAGCAG<br>R: AGTGGCTGCACAAAATGACA     |
| TCR $\beta$        | BC149560         | F: GAGGAGCAGAACAGGACCAA<br>R: GACAGGACCCCTTGCTGATA    |
| TCR $\gamma$       | BC142018.1       | F: TAGACGGTGCCCTAAAATGG<br>R: AACTGTTTGCCAGTGGTTT     |
| CD3 $\zeta$        | NM_174012.2      | F: ACATAGCGGTGTCATTGCAG<br>R: CTCATTCCATGAGGTGAGCA    |
| MEK1/2             | CK772376         | F: GCATGCTTTGCTGCTATAAAAA<br>R: AAGGGCTCTGGCTAGATTTTG |
| CD8                | NM_174015.1      | F: TGAGCAACCTGACCTCTGAA<br>R: GGTGGCCTCTCCTCTTTCAT    |
