# Supplementary material
Source: PubMed Central journal article supplement (PMC2646461)
Supplement: 90276.2008_3.pdf [file 90276.2008_3.pdf]

**Supplemental table 2. Accession numbers**

| <i>Gene</i> | <i>Accession</i>                                |
|-------------|-------------------------------------------------|
| STAT1       | NM_001077900.1                                  |
| STAT2       | XM_588270.3                                     |
| ISGF3       | XM_001253473.1                                  |
| IRF1        | NM_177432.2                                     |
| ISG15       | NM_174366                                       |
| MX2         | Bt.8143.1.S1_at                                 |
| CXCL12      | XM_864886.2                                     |
| G-protein   | NM_001097561.1<br>NM_001024523.1<br>NM_174811.3 |
| LCK         | NM_001034334.1                                  |
| MEK1/2      | XM_612526                                       |
| ERK1/2      | NM_175793.2                                     |
