# Supplementary material
Source: PubMed Central journal article supplement (PMC2646461)
Supplement: 90276.2008_4.pdf [file 90276.2008_4.pdf]

**Supplemental table 3. Differentially expressed genes in heifers of the PI and control groups, day 160 of gestation.**

| Gene Identification   | Gene Name                                                                                                                                                                                                              | LogFold     | Ratio       |
|-----------------------|------------------------------------------------------------------------------------------------------------------------------------------------------------------------------------------------------------------------|-------------|-------------|
| AFFX-BioC-3_at        | BIOTIN SYNTHESIS PROTEIN BIOC                                                                                                                                                                                          | -0.23054404 | 0.832974367 |
| AFFX-BioC-5_at        | BIOTIN SYNTHESIS PROTEIN BIOC                                                                                                                                                                                          | -0.24708439 | 0.846912371 |
| AFFX-BioDn-3_at       | DETHIOBIOTIN SYNTHETASE                                                                                                                                                                                                | -0.2432203  | 0.844889208 |
| AFFX-BioDn-5_at       | DETHIOBIOTIN SYNTHETASE                                                                                                                                                                                                | -0.237819   | 0.849775264 |
| AFFX-Bt_Cyph_5_at     | PEPTIDYLPROLYL ISOMERASE B (CYCLOPHILIN B)                                                                                                                                                                             | 0.092022026 | 1.063581924 |
| AFFX-Bt_Cyph_M_at     | PEPTIDYLPROLYL ISOMERASE B (CYCLOPHILIN B)                                                                                                                                                                             | 0.060799322 | 1.020669361 |
| AFFX-Bt_eIF-4E_3_at   | EUKARYOTIC TRANSLATION INITIATION FACTOR 4E                                                                                                                                                                            | -0.12648477 | 0.874231656 |
| AFFX-Bt-ef1a-5_at     | EUKARYOTIC TRANSLATION ELONGATION FACTOR 1 ALPHA 1                                                                                                                                                                     | -0.03471622 | 0.984016881 |
| AFFX-Bt-ef1a-M_at     | EUKARYOTIC TRANSLATION ELONGATION FACTOR 1 ALPHA 1                                                                                                                                                                     | -0.05014881 | 0.947494618 |
| AFFX-Bt-gapd-3_at     | GLYCERALDEHYDE-3-PHOSPHATE DEHYDROGENASE                                                                                                                                                                               | 0.078488264 | 1.066509628 |
| AFFX-Bt-gapd-5_at     | GLYCERALDEHYDE-3-PHOSPHATE DEHYDROGENASE                                                                                                                                                                               | 0.10458921  | 1.094165675 |
| AFFX-Bt-gapd-M_at     | GLYCERALDEHYDE-3-PHOSPHATE DEHYDROGENASE                                                                                                                                                                               | 0.055625129 | 1.059421891 |
| AFFX-Bt-X03453-2_s_at | .CONTROL X03453 /FEA=CDS_2 /DB_XREF=CAA27178.1 GI:15137 GOA:P06956                                                                                                                                                     | -0.08128581 | 0.944531075 |
| AFFX-CreX-3_at        | CYCLIZATION RECOMBINASE                                                                                                                                                                                                | -0.17514571 | 0.883954679 |
| AFFX-CreX-5_at        | CYCLIZATION RECOMBINASE                                                                                                                                                                                                | -0.2035355  | 0.87160749  |
| AFFX-r2-Ec-bioC-3_at  | BIOTIN SYNTHESIS PROTEIN BIOC                                                                                                                                                                                          | -0.19097208 | 0.842656599 |
| AFFX-r2-Ec-bioC-5_at  | BIOTIN SYNTHESIS PROTEIN BIOC                                                                                                                                                                                          | -0.17980747 | 0.848569463 |
| AFFX-r2-Ec-bioD-3_at  | DETHIOBIOTIN SYNTHETASE                                                                                                                                                                                                | -0.17517629 | 0.878158238 |
| AFFX-r2-Ec-bioD-5_at  | DETHIOBIOTIN SYNTHETASE                                                                                                                                                                                                | -0.19559074 | 0.864322551 |
| AFFX-r2-P1-cre-3_at   | CYCLIZATION RECOMBINASE                                                                                                                                                                                                | -0.09416552 | 0.935447092 |
| AFFX-r2-P1-cre-5_at   | CYCLIZATION RECOMBINASE                                                                                                                                                                                                | -0.159339   | 0.893959605 |
| Bt.10006.1.A1_at      | .GB:CK848153 /DB_XREF=GI:45210276 /DB_XREF=970871 /TID=BT.10006.1 /CNT=6<br>.GB:CK981092 /DB_XREF=GI:45499072 /DB_XREF=4112739 /CLONE=9BOV42_C02<br>/TID=BT.10043.1 /CNT=13 /FEA=EST /TIER=CONSEND /STK=2 /UG=BT.10043 | -0.16259742 | 0.871113449 |
| Bt.10043.1.S1_at      |                                                                                                                                                                                                                        | -0.23325659 | 0.805910948 |
| Bt.1007.1.S1_at       | MAJOR HISTOCOMPATIBILITY COMPLEX, CLASS II, DM BETA-CHAIN, EXPRESSED                                                                                                                                                   | 0.148730472 | 1.05226645  |
| Bt.10076.1.S1_at      | RCSD DOMAIN CONTAINING 1                                                                                                                                                                                               | -0.12702545 | 0.887973097 |
| Bt.10077.1.S2_at      | INTERFERON RESPONSIVE FACTOR 1                                                                                                                                                                                         | 0.289086767 | 1.107181151 |
| Bt.10116.1.A1_at      | .GB:CK769666 /DB_XREF=GI:42723760 /DB_XREF=957731 /TID=BT.10116.1 /CNT=14<br>/FEA=EST /TIER=CONSEND /STK=0 /UG=BT.10116 /UG_TITLE=TRANSCRIBED                                                                          | 0.352099378 | 1.223423884 |
| Bt.1020.1.S1_at       | SIMILAR TO DUAL SPECIFICITY PROTEIN KINASE CLK1 (CDC-LIKE KINASE 1)                                                                                                                                                    | -0.2437699  | 0.799779164 |
| Bt.10236.1.S1_at      | SIMILAR TO ARMET PROTEIN PRECURSOR (ARGININE-RICH PROTEIN)                                                                                                                                                             | 0.352479645 | 1.317160148 |
| Bt.10245.1.S1_at      | FUSED TOES HOMOLOG                                                                                                                                                                                                     | -0.15023051 | 0.851097727 |

|                    |                                                                                                                                                                                                                           |             |             |
|--------------------|---------------------------------------------------------------------------------------------------------------------------------------------------------------------------------------------------------------------------|-------------|-------------|
| Bt.10271.1.A1_at   | .GB:CB171569 /DB_XREF=GI:28157697 /DB_XREF=PKO602601340.R1                                                                                                                                                                | 0.10263419  | 1.062855246 |
| Bt.10277.2.S1_a_at | /TID=BT.10271.1 /CNT=24 /FEA=EST /TIER=STACK /STK=9 /UG=BT.10271<br>SIMILAR TO NUCLEOLAR PROTEIN 5A (56KDA WITH KKE/D REPEAT)                                                                                             | 0.330342362 | 1.280430141 |
| Bt.10278.1.S1_at   | .GB:CB172509 /DB_XREF=GI:28158637 /DB_XREF=UMJ603014336.R1                                                                                                                                                                |             |             |
| Bt.1031.1.S1_at    | /TID=BT.10278.1 /CNT=82 /FEA=EST /TIER=STACK /STK=28 /UG=BT.10278<br>CATHEPSIN H                                                                                                                                          | 0.108854122 | 1.057758756 |
| Bt.10398.1.S1_at   | .GB:CK846010 /DB_XREF=GI:45206097 /DB_XREF=968461 /TID=BT.10398.1 /CNT=9<br>/FEA=EST /TIER=CONSEND /STK=3 /UG=BT.10398 /UG_TITLE=TRANSCRIBED                                                                              | 0.125257901 | 1.102196862 |
| Bt.10579.1.S1_at   | .GB:CK957651 /DB_XREF=GI:45472031 /DB_XREF=4098130 /CLONE=10BOV4_B09                                                                                                                                                      | -1.15148399 | 0.383755633 |
| Bt.10608.2.S1_a_at | /TID=BT.10579.1 /CNT=26 /FEA=EST /TIER=CONSEND /STK=0 /UG=BT.10579<br>HYPOTHETICAL LOC505736                                                                                                                              | 0.205503309 | 1.166991423 |
| Bt.1085.1.S1_at    | SFT2 DOMAIN CONTAINING 2                                                                                                                                                                                                  | 0.354976618 | 1.245245164 |
| Bt.10855.1.S1_at   | SIMILAR TO REGULATOR OF G-PROTEIN SIGNALLING 2, 24KDA                                                                                                                                                                     | 0.141051601 | 1.070670174 |
| Bt.1087.1.S1_at    | .GB:CB455930 /DB_XREF=GI:29262312 /DB_XREF=713115 /TID=BT.1087.1 /CNT=36<br>/FEA=EST /TIER=STACK /STK=6 /UG=BT.1087 /UG_TITLE=TRANSCRIBED                                                                                 | -0.38168707 | 0.914814258 |
| Bt.1088.1.S1_a_at  | .GB:CK948232 /DB_XREF=GI:45462612 /DB_XREF=4073036 /CLONE=10BOV24_E21                                                                                                                                                     | 0.270673024 | 1.242471667 |
| Bt.1088.2.S1_at    | /TID=BT.1088.1 /CNT=14 /FEA=EST /TIER=CONSEND /STK=4 /UG=BT.1088<br>.GB:CK778198 /DB_XREF=GI:42730511 /DB_XREF=965353 /TID=BT.1088.2 /CNT=6<br>/FEA=EST /TIER=CONSEND /STK=3 /UG=BT.1088 /UG_TITLE=TRANSCRIBED            | -0.09812032 | 0.89980966  |
| Bt.10903.2.S1_at   | .GB:CK961569 /DB_XREF=GI:45475949 /DB_XREF=4076141 /CLONE=9BOV10_N06                                                                                                                                                      | -0.0663563  | 0.935172599 |
| Bt.10935.1.S1_at   | /TID=BT.10903.2 /CNT=35 /FEA=EST /TIER=STACK /STK=9 /UG=BT.10903<br>TOLL INTERACTING PROTEIN                                                                                                                              | 0.288127428 | 1.173924533 |
| Bt.1094.1.S1_at    | .GB:CB419744 /DB_XREF=GI:29185111 /DB_XREF=592623 /TID=BT.1094.1 /CNT=17                                                                                                                                                  | -0.09777569 | 0.947395098 |
| Bt.10949.1.S1_at   | .GB:BF653247 /DB_XREF=GI:11918379 /DB_XREF=277028 /TID=BT.10949.1 /CNT=7<br>.GB:CB454068 /DB_XREF=GI:29260450 /DB_XREF=710759 /TID=BT.10956.1 /CNT=11<br>/FEA=EST /TIER=CONSEND /STK=1 /UG=BT.10956 /UG_TITLE=TRANSCRIBED | -0.85902004 | 0.906958655 |
| Bt.10956.1.S1_at   | RIBOSOMAL PROTEIN S15A                                                                                                                                                                                                    | -0.25459947 | 0.919663687 |
| Bt.10969.1.S1_at   | .GB:BM087882 /DB_XREF=GI:16998510 /DB_XREF=500731 /TID=BT.10994.1 /CNT=9                                                                                                                                                  | -0.18878115 | 0.877925375 |
| Bt.11088.1.S1_a_at | CD97 ANTIGEN                                                                                                                                                                                                              | -0.10029449 | 0.913929378 |
| Bt.11105.1.S1_at   | NUCLEASE SENSITIVE ELEMENT BINDING PROTEIN 1                                                                                                                                                                              | 0.149176917 | 1.154639116 |
| Bt.11156.1.S1_at   | SIMILAR TO HYPOTHETICAL UPF0184 PROTEIN C9ORF16 HOMOLOG                                                                                                                                                                   | -0.13411444 | 0.92692037  |
| Bt.11167.1.S1_at   | SIMILAR TO CG14407-PA                                                                                                                                                                                                     | -0.14367477 | 0.974015219 |
| Bt.11208.1.S1_at   | SIMILAR TO CALMODULIN 1                                                                                                                                                                                                   | 0.42021972  | 1.319715559 |
| Bt.11259.1.S1_at   | SIMILAR TO PUTATIVE ISG12(A) PROTEIN                                                                                                                                                                                      | 0.630262698 | 1.604606023 |
| Bt.1131.1.S1_at    | PEPTIDYLPROLYL ISOMERASE B (CYCLOPHILIN B)                                                                                                                                                                                | 0.162332162 | 1.113454319 |
| Bt.1137.1.S1_at    | .GB:CK848303 /DB_XREF=GI:45210555 /DB_XREF=971046 /TID=BT.1137.1 /CNT=29<br>/FEA=EST /TIER=CONSEND /STK=0 /UG=BT.1137 /UG_TITLE=TRANSCRIBED                                                                               | 1.415595861 | 4.273349609 |
|                    |                                                                                                                                                                                                                           | 0.087069092 | 1.080108333 |
|                    |                                                                                                                                                                                                                           | -0.14423611 | 0.968401389 |

|                    |                                                                           |             |             |
|--------------------|---------------------------------------------------------------------------|-------------|-------------|
| Bt.11389.1.S1_a_at | SIMILAR TO CYCLIN I                                                       | 0.087727888 | 1.047396714 |
| Bt.11389.1.S1_at   | SIMILAR TO CYCLIN I                                                       | 0.053975111 | 1.045484413 |
| Bt.11433.1.A1_at   | RIBOSOMAL PROTEIN, LARGE, P1                                              | 0.153204307 | 1.136526397 |
| Bt.11581.1.S1_at   | SIMILAR TO PLATELET FACTOR 4 PRECURSOR (PF-4) (CXCL4) (ONCOSTATIN A)      | 0.197827108 | 1.187266505 |
| Bt.1165.1.S1_at    | ADENYLATE CYCLASE 7                                                       | -0.11297866 | 0.913529836 |
| Bt.1167.1.S1_at    | SIMILAR TO DEK ONCOGENE (DNA BINDING)                                     | -0.08827048 | 0.942680899 |
| Bt.1169.1.S1_at    | SIMILAR TO GAMMA ADDUCIN (ADDUCIN-LIKE PROTEIN 70)                        | -0.09753694 | 0.91047216  |
| Bt.1178.1.S1_at    | TROPOMYOSIN 2                                                             | 0.642697893 | 1.506847084 |
| Bt.11826.1.S1_at   | .GB:CK960760 /DB_XREF=GI:45475140 /DB_XREF=4101654 /CLONE=10BOV8_E05      | -0.16380091 | 0.890247889 |
| Bt.11847.1.A1_at   | X (INACTIVE)-SPECIFIC TRANSCRIPT                                          | -0.41913931 | 0.693094531 |
|                    | .GB:AU278571 /DB_XREF=GI:21681881 /DB_XREF=AU278571                       |             |             |
| Bt.11857.1.A1_at   | /CLONE=PLACENTA0784 /TID=BT.11857.1 /CNT=1 /FEA=EST /TIER=CONSEND         | -0.150176   | 0.937727181 |
| Bt.1193.1.S1_at    | PHOSPHOARGININE PHOSPHATASE                                               | 0.060013064 | 1.026427019 |
| Bt.11990.1.S1_at   | .GB:BE809771 /DB_XREF=GI:10240883 /DB_XREF=215525 /TID=BT.11990.1 /CNT=12 | -0.22806061 | 0.847712758 |
|                    | .GB:AV607578 /DB_XREF=GI:9737951 /DB_XREF=AV607578 /CLONE=E1KI041G03      |             |             |
| Bt.1200.2.A1_a_at  | /TID=BT.1200.2 /CNT=1 /FEA=EST /TIER=CONSEND /STK=1 /UG=BT.1200           | 0.470405888 | 1.465218118 |
| Bt.12176.1.A1_at   | T CELL RECEPTOR GAMMA CHAIN VARIABLE REGION BVG7                          | -0.14959821 | 0.812770719 |
|                    | .GB:CK956156 /DB_XREF=GI:45470536 /DB_XREF=4096229 /CLONE=10BOV35_C04     |             |             |
|                    | /TID=BT.12196.1 /CNT=14 /FEA=EST /TIER=CONSEND /STK=0 /UG=BT.12196        |             |             |
|                    | /UG_TITLE=TRANSCRIBED SEQUENCE WITH MODERATE SIMILARITY TO PROTEIN        |             |             |
| Bt.12196.1.S1_at   | REF:NP_002829.2 (H.SAPIENS) PROTEIN TYROSINE PHOSPHATASE, RECEPTOR        | -0.11283503 | 0.93778975  |
| Bt.12206.1.S1_x_at | NEUTROPHIL BETA-DEFENSIN-9 LIKE PEPTIDE                                   | 0.447030402 | 1.347706841 |
| Bt.12241.1.S1_at   | CHEMOKINE RECEPTOR 7                                                      | -0.20790439 | 0.984851453 |
| Bt.1226.1.S1_a_at  | SIMILAR TO RIBOSOMAL PROTEIN L28                                          | 0.047647034 | 1.023282432 |
| Bt.12290.1.S1_at   | PC4 AND SFRS1 INTERACTING PROTEIN 1                                       | -0.13448604 | 0.825398975 |
| Bt.12309.1.S1_at   | HEAT SHOCK 70 KDA PROTEIN 8                                               | -0.05199656 | 0.999087914 |
| Bt.12314.1.S1_at   | 6-PHOSPHOFRUCTO-2-KINASE                                                  | -0.36834791 | 0.801194499 |
| Bt.12322.1.S1_at   | S-ADENOSYLHOMOCYSTEINE HYDROLASE                                          | 0.159601605 | 1.152506126 |
| Bt.12327.1.S1_at   | SIMILAR TO THIOREDOXIN INTERACTING PROTEIN ISOFORM 2                      | -0.18989343 | 0.877815856 |
|                    | .GB:CK975040 /DB_XREF=GI:45493014 /DB_XREF=4106148 /CLONE=9BOV32_P11      |             |             |
| Bt.12348.1.A1_at   | /TID=BT.12348.1 /CNT=10 /FEA=EST /TIER=STACK /STK=7 /UG=BT.12348          | -0.11198635 | 0.941194056 |
| Bt.12360.1.S1_at   | TRANSMEMBRANE 4 SUPERFAMILY MEMBER 17 ISOFORM B                           | 0.400532816 | 1.224879179 |
| Bt.12366.1.S1_at   | SIMILAR TO CYCLIN L2 ISOFORM 1                                            | -0.27559172 | 0.806252097 |
|                    | .GB:BI536672 /DB_XREF=GI:15377782 /DB_XREF=393857 /TID=BT.12404.1 /CNT=18 |             |             |
| Bt.12404.1.S1_at   | /FEA=EST /TIER=CONSEND /STK=0 /UG=BT.12404 /UG_TITLE=TRANSCRIBED          | -0.16189873 | 0.886592351 |
|                    | .GB:CB166723 /DB_XREF=GI:28152848 /DB_XREF=CTD602999955.R1                |             |             |
| Bt.12423.1.S1_at   | /TID=BT.12423.1 /CNT=25 /FEA=EST /TIER=STACK /STK=6 /UG=BT.12423          | -0.0922783  | 0.978341073 |

|                    |                                                                            |             |             |
|--------------------|----------------------------------------------------------------------------|-------------|-------------|
| Bt.12429.1.S1_at   | ENDOTHELIAL DIFFERENTIATION-RELATED FACTOR 1                               | 0.148800183 | 1.116563766 |
| Bt.1244.1.S1_at    | SIMILAR TO 6-PHOSPHOGLUCONATE DEHYDROGENASE (DECARBOXYLATING)              | -0.09486993 | 0.931759084 |
| Bt.12461.1.S1_at   | ENHANCER OF RUDIMENTARY HOMOLOG (DROSOPHILA)                               | 0.095545935 | 1.028143808 |
| Bt.12469.1.S1_at   | TU TRANSLATION ELONGATION FACTOR, MITOCHONDRIAL                            | 0.070528926 | 1.051511366 |
| Bt.12490.2.A1_x_at | IGG1 HEAVY CHAIN CONSTANT REGION                                           | 0.293604768 | 1.291004018 |
| Bt.12500.2.S1_a_at | LYMPHOCYTE CYTOSOLIC PROTEIN 1 (L-PLASTIN)                                 | -0.07083106 | 0.942502053 |
| Bt.12504.1.S1_at   | CLUSTERIN                                                                  | 0.780145064 | 1.639443941 |
| Bt.12553.1.S1_at   | HAPTOGLOBIN                                                                | -0.26454891 | 1.050601127 |
| Bt.12613.1.S1_at   | SIMILAR TO KRUPPEL-LIKE FACTOR 6                                           | -0.41785043 | 0.74697657  |
| Bt.1269.1.S1_a_at  | RIBOSOMAL PROTEIN S12                                                      | 0.019982395 | 1.015185391 |
| Bt.12722.1.A1_at   | SIMILAR TO PDZ DOMAIN CONTAINING 6                                         | -0.32629762 | 0.884221041 |
| Bt.12739.1.S1_at   | SIMILAR TO MEMBRANE-ASSOCIATED RING FINGER (C3HC4) 2 ISOFORM 1             | 0.573124834 | 1.584067487 |
| Bt.12739.2.S1_a_at | SIMILAR TO MEMBRANE-ASSOCIATED RING FINGER (C3HC4) 2 ISOFORM 1             | 0.457473372 | 1.438082477 |
| Bt.12805.1.S1_at   | SIMILAR TO HUMAN HYPOTHETICAL PROTEIN FLJ22662                             | 0.316355307 | 1.238068258 |
| Bt.1283.1.S1_at    | BARRIER TO AUTOINTEGRATION FACTOR 1                                        | 0.140427461 | 1.099417229 |
| Bt.12859.1.S1_at   | SIMILAR TO HETEROGENEOUS NUCLEAR RIBONUCLEOPROTEIN H1                      | -0.13731616 | 0.898506472 |
| Bt.12870.1.S1_at   | SIMILAR TO 55 KDA ERYTHROCYTE MEMBRANE PROTEIN (P55) (MEMBRANE             | 0.252554923 | 1.212114916 |
| Bt.12875.1.S1_at   | EPITHELIAL MEMBRANE PROTEIN 3                                              | 0.196296153 | 1.146196287 |
| Bt.12896.1.S1_at   | CALMODULIN 2                                                               | -0.07678902 | 0.927059829 |
| Bt.1290.1.A1_a_at  | SIMILAR TO PROTEASOME BETA 2 SUBUNIT                                       | 0.155985276 | 1.117587518 |
| Bt.12906.2.S1_at   | SIMILAR TO GELSOLIN PRECURSOR (ACTIN-DEPOLYMERIZING FACTOR) (ADF)          | 0.785175302 | 1.921138989 |
| Bt.12911.1.S1_at   | RIBOSOMAL PROTEIN L26                                                      | 0.046168763 | 1.007796132 |
| Bt.12957.1.A1_at   | _GB:CB170194 /DB_XREF=GI:28156322 /DB_XREF=YIR603162978.R1 /TID=BT.12957.1 | -0.14481754 | 0.873592673 |
| Bt.12986.1.S1_at   | MAD2 MITOTIC ARREST DEFICIENT-LIKE 1 (YEAST)                               | 0.357974908 | 1.228678525 |
| Bt.1302.1.S1_at    | APEX NUCLEASE (MULTIFUNCTIONAL DNA REPAIR ENZYME) 1                        | 0.229540979 | 1.101364882 |
| Bt.1309.1.A1_at    | _GB:AW425689 /DB_XREF=GI:6953636 /DB_XREF=58040 /TID=BT.1309.1 /CNT=2      | 0.088752363 | 1.05853786  |
| Bt.13128.1.S1_at   | SUCCINATE DEHYDROGENASE COMPLEX, SUBUNIT B, IRON SULFUR (IP)               | 0.149537184 | 1.145437154 |
| Bt.13170.1.S1_at   | SUCCINATE DEHYDROGENASE COMPLEX, SUBUNIT C, INTEGRAL MEMBRANE              | 0.118238425 | 1.081095861 |
| Bt.13261.1.A1_at   | _GB:CB464510 /DB_XREF=GI:29270895 /DB_XREF=725723 /TID=BT.13261.1 /CNT=9   | -0.07710792 | 0.959290645 |
| Bt.13293.1.S1_at   | /FEA=EST /TIER=STACK /STK=7 /UG=BT.13261 /UG_TITLE=TRANSCRIBED             | 0.050207096 | 0.987003167 |
| Bt.13296.2.A1_at   | SIMILAR TO B-LYMPHOCYTE ACTIVATION MARKER BLAST-1 PRECURSOR (BCM1          | 0.625426288 | 1.428967816 |
| Bt.1330.1.S1_at    | SIMILAR TO CG15270-PA, ISOFORM A                                           | -1.13250738 | 0.459382218 |
| Bt.13311.1.S1_at   | ALDOSE REDUCTASE                                                           | -0.08179312 | 0.959659757 |
| Bt.1334.1.S1_at    | SIMILAR TO TRANSLATION FACTOR SUI1 HOMOLOG                                 | 0.074428899 | 1.054038751 |
|                    | _GB:BI538156 /DB_XREF=GI:15379257 /DB_XREF=428556 /TID=BT.1334.1 /CNT=18   |             |             |
|                    | /FEA=EST /TIER=CONSEND /STK=0 /UG=BT.1334 /UG_TITLE=TRANSCRIBED            |             |             |

|                    |                                                                            |             |             |
|--------------------|----------------------------------------------------------------------------|-------------|-------------|
| Bt.13401.1.S1_at   | .GB:CK848852 /DB_XREF=GI:45211573 /DB_XREF=971669 /TID=BT.13401.1 /CNT=18  | 0.181290886 | 1.140069053 |
| Bt.13491.1.S1_at   | /FEA=EST /TIER=STACK /STK=6 /UG=BT.13401 /UG_TITLE=TRANSCRIBED             | 0.450867321 | 1.353805002 |
| Bt.13496.2.S1_a_at | .GB:BM106294 /DB_XREF=GI:17037364 /DB_XREF=509991 /TID=BT.13491.1 /CNT=5   | 0.176947873 | 1.127919028 |
| Bt.13510.1.S1_at   | CD63 PROTEIN                                                               | -0.20875814 | 0.859284062 |
| Bt.13553.2.S1_a_at | MAJOR HISTOCOMPATIBILITY COMPLEX, CLASS II, DO BETA                        | 0.296207028 | 1.2272545   |
| Bt.13574.1.S1_at   | HYPOTHETICAL PROTEIN                                                       | 0.110964598 | 1.0655362   |
| Bt.1358.1.S1_at    | ADP-RIBOSYLATION-LIKE FACTOR 6 INTERACTING PROTEIN 5                       | 0.255350174 | 1.368319944 |
| Bt.13589.1.A1_at   | PDZ AND LIM DOMAIN 1 (ELFIN)                                               | 0.204218018 | 1.101896241 |
| Bt.13628.1.S1_at   | DUAL SPECIFICITY PHOSPHATASE 11                                            | 0.12553391  | 1.111895943 |
| Bt.1370.1.S1_at    | SIMILAR TO TRANSGLUTAMINASE 3 PRECURSOR                                    | -0.57202016 | 0.673800318 |
| Bt.13702.1.S1_at   | ARGININOSUCCINATE SYNTHETASE                                               | -0.15976346 | 0.861450419 |
| Bt.13705.1.S1_at   | .GB:CK849544 /DB_XREF=GI:45212880 /DB_XREF=972550 /TID=BT.13702.1 /CNT=20  | 0.064549232 | 0.963740136 |
| Bt.1372.2.S1_at    | SIGNAL SEQUENCE RECEPTOR, BETA (TRANSLOCON-ASSOCIATED PROTEIN              | 0.202750973 | 1.130775996 |
| Bt.13739.1.S1_at   | .GB:AW464378 /DB_XREF=GI:7034546 /DB_XREF=BP230015B10F5                    | 0.230241062 | 1.081414679 |
| Bt.13769.1.S1_at   | /CLONE=BP230015B10F5 /TID=BT.1372.2 /CNT=22 /FEA=EST /TIER=CONSEND         | 0.378701264 | 1.335628663 |
| Bt.1377.1.S1_at    | .GB:CB171573 /DB_XREF=GI:28157701 /DB_XREF=PKO602601345.R1                 | 0.218317301 | 1.066675899 |
| Bt.13798.1.S1_at   | .GB:BE751908 /DB_XREF=GI:10165900 /DB_XREF=204161 /TID=BT.13769.1 /CNT=6   | 0.461995035 | 1.15653032  |
| Bt.13829.1.S1_at   | CHEMOKINE C-C MOTIF RECEPTOR 1                                             | -0.08757626 | 0.981348989 |
| Bt.13851.1.S1_at   | .GB:CF931206 /DB_XREF=GI:38281241 /DB_XREF=CF--06-R-J06 /TID=BT.13798.1    | 0.175410828 | 1.112833361 |
| Bt.13873.1.S1_at   | .GB:CK982442 /DB_XREF=GI:45500422 /DB_XREF=4114846 /CLONE=9BOV44_J21       | -0.30060505 | 0.7853576   |
| Bt.13887.1.S1_at   | INTERLEUKIN-13 RECEPTOR ALPHA-1 CHAIN PRECURSOR                            | 0.199007344 | 1.103102383 |
| Bt.13898.1.S1_at   | .GB:CB538791 /DB_XREF=GI:29407735 /DB_XREF=776818 /TID=BT.13873.1 /CNT=9   | 0.119704371 | 1.089176223 |
| Bt.13902.1.S1_at   | .GB:CK941653 /DB_XREF=GI:45456033 /DB_XREF=4064986 /CLONE=10BOV11_E11      | 0.452767895 | 1.335602074 |
| Bt.13920.1.S1_at   | /TID=BT.13887.1 /CNT=6 /FEA=EST /TIER=CONSEND /STK=3 /UG=BT.13887          | 0.33167394  | 1.220860291 |
| Bt.13987.1.A1_at   | /UG_TITLE=TRANSCRIBED SEQUENCE WITH STRONG SIMILARITY TO PROTEIN           | -0.26597735 | 0.858268938 |
| Bt.1399.1.S1_at    | RIBOSOMAL PROTEIN S27-LIKE                                                 | 0.177823216 | 1.151718601 |
| Bt.13991.1.A1_at   | .GB:CK847334 /DB_XREF=GI:45208728 /DB_XREF=969966 /TID=BT.13902.1 /CNT=12  | -0.10874573 | 0.931564481 |
| Bt.14005.1.S1_at   | /FEA=EST /TIER=CONSEND /STK=1 /UG=BT.13902 /UG_TITLE=TRANSCRIBED           | -0.07928819 | 0.959523095 |
| Bt.14047.1.A1_at   | .GB:BI535453 /DB_XREF=GI:15376561 /DB_XREF=398992 /TID=BT.13920.1 /CNT=4   | 0.217010949 | 1.12727455  |
| Bt.14098.1.S1_at   | .GB:CB170166 /DB_XREF=GI:28156294 /DB_XREF=YIR603162946.R1 /TID=BT.13987.1 | 0.186815081 | 1.0756136   |
| Bt.14136.1.A1_at   | ATPASE, VACUOLAR, 14 KD                                                    | 0.351384685 | 1.237554621 |
| Bt.14186.1.S1_at   | PROLINE-RICH NUCLEAR RECEPTOR COACTIVATOR 1                                | -0.02657193 | 0.9892742   |
|                    | CD53 ANTIGEN                                                               |             |             |
|                    | TRIPARTITE MOTIF-CONTAINING 6                                              |             |             |
|                    | SIMILAR TO MICROTUBULE-ASSOCIATED PROTEIN RP/EB FAMILY MEMBER 2 (APC-      |             |             |
|                    | .GB:CB421505 /DB_XREF=GI:29188625 /DB_XREF=594527 /TID=BT.14136.1 /CNT=6   |             |             |
|                    | ACTIN, BETA                                                                |             |             |

|                    |                                                                           |             |             |
|--------------------|---------------------------------------------------------------------------|-------------|-------------|
| Bt.14228.1.S1_at   | SIMILAR TO RIBOSOMAL PROTEIN L36                                          | 0.040573001 | 1.029409113 |
| Bt.1430.1.S1_at    | PREFOLDIN 5                                                               | 0.070967036 | 1.012557872 |
| Bt.1432.2.S1_at    | SIMILAR TO PAROXISOME PROLIFERATIVE ACTIVATED RECEPTOR, GAMMA,            | 0.056244823 | 1.008002507 |
| Bt.14326.1.S1_at   | SIMILAR TO SPERMINE SYNTHASE                                              | 0.178123095 | 1.132924079 |
| Bt.1457.1.A1_at    | .GB:CK978412 /DB_XREF=GI:45496386 /DB_XREF=4109621 /CLONE=9BOV38_A04      | 0.246577932 | 1.106782634 |
| Bt.14590.1.A1_at   | SIMILAR TO TYROSINE-PROTEIN KINASE BLK (B LYMPHOCYTE KINASE) (P55-BLK)    | -0.25107767 | 0.7833729   |
| Bt.1476.1.S1_at    | .GB:BM252021 /DB_XREF=GI:17887649 /DB_XREF=BOTL0100018_E10                | -0.18990672 | 0.771518108 |
| Bt.15384.1.S1_at   | RIBOSOMAL PROTEIN L35A                                                    | 0.078363698 | 1.083454637 |
| Bt.15436.2.S1_a_at | RIBOSOMAL PROTEIN L10                                                     | 0.055122043 | 1.039866099 |
| Bt.1548.1.S1_at    | .GB:CK771078 /DB_XREF=GI:42725172 /DB_XREF=959314 /TID=BT.1548.1 /CNT=33  | 0.15084391  | 1.071637635 |
| Bt.1552.1.S1_at    | /FEA=EST /TIER=STACK /STK=9 /UG=BT.1548 /UG_TITLE=TRANSCRIBED             | 0.176292704 | 1.071453301 |
| Bt.15530.1.S1_at   | SERYL-TRNA SYNTHETASE                                                     | 0.032805191 | 1.019700869 |
| Bt.15534.1.S1_a_at | RIBOSOMAL PROTEIN L12                                                     | 0.17217578  | 1.149029885 |
| Bt.15545.1.S1_at   | SIMILAR TO TUBULIN, ALPHA 1                                               | 0.149909852 | 1.109554716 |
| Bt.15548.1.A1_at   | EUKARYOTIC TRANSLATION INITIATION FACTOR 4A, ISOFORM 1                    | 0.214454813 | 1.147552102 |
| Bt.1556.1.S1_at    | .GB:BP108827 /DB_XREF=GI:28311115 /DB_XREF=BP108827 /CLONE=ORCS12492      | 0.299797527 | 1.262472873 |
| Bt.15561.1.S1_at   | SIMILAR TO RIBONUCLEASE UK114 (14.5 KDA TRANSLATIONAL INHIBITOR           | 0.058180601 | 1.004512456 |
| Bt.15615.1.S1_at   | .GB:CB464457 /DB_XREF=GI:29270842 /DB_XREF=725668 /TID=BT.15561.1 /CNT=26 | 0.241767766 | 1.207217256 |
| Bt.15616.1.S1_at   | /FEA=EST /TIER=CONSEND /STK=3 /UG=BT.15615 /UG_TITLE=TRANSCRIBED          | 0.273560608 | 1.166754862 |
| Bt.15684.1.S1_at   | .GB:CK770544 /DB_XREF=GI:42724638 /DB_XREF=958731 /TID=BT.15616.1 /CNT=4  | 0.082946892 | 1.025411216 |
| Bt.15705.1.S1_at   | .GB:CB531064 /DB_XREF=GI:29393386 /DB_XREF=742313 /TID=BT.15684.1 /CNT=49 | 0.624063476 | 1.437119495 |
| Bt.15705.1.S2_at   | /FEA=EST /TIER=STACK /STK=7 /UG=BT.15684 /UG_TITLE=TRANSCRIBED            | 0.579218551 | 1.38182057  |
| Bt.15711.2.S1_a_at | DESTRIN (ACTIN DEPOLYMERIZING FACTOR)                                     | 0.081443043 | 1.063936491 |
| Bt.15713.1.A1_at   | DESTRIN (ACTIN DEPOLYMERIZING FACTOR)                                     | 0.190883235 | 1.207482353 |
| Bt.15716.1.S1_at   | SIMILAR TO POLY(RC) BINDING PROTEIN 2                                     | 0.211669495 | 1.091814485 |
| Bt.15724.1.S1_at   | .GB:CB439472 /DB_XREF=GI:29224517 /DB_XREF=689121 /TID=BT.15713.1 /CNT=7  | 0.143636814 | 1.059112151 |
| Bt.15725.1.A1_at   | /FEA=EST /TIER=CONSEND /STK=4 /UG=BT.15713 /UG_TITLE=TRANSCRIBED          | 0.262837616 | 1.205891494 |
| Bt.15729.1.S1_at   | .GB:CB168620 /DB_XREF=GI:28154746 /DB_XREF=VQT602700424.R1                | 0.228047022 | 1.175080121 |
| Bt.15736.1.S1_at   | .GB:CK953752 /DB_XREF=GI:45468132 /DB_XREF=4093549 /CLONE=10BOV32_C12     | -0.0918883  | 0.924106893 |
| Bt.15742.1.S2_at   | /TID=BT.15725.1 /CNT=6 /FEA=EST /TIER=CONSEND /STK=3 /UG=BT.15725         | -0.08961207 | 0.966556206 |
|                    | PROTEASOME ACTIVATOR SUBUNIT 2                                            |             |             |
|                    | .GB:CB531703 /DB_XREF=GI:29394667 /DB_XREF=754568 /TID=BT.15736.1 /CNT=24 |             |             |
|                    | /FEA=EST /TIER=CONSEND /STK=1 /UG=BT.15736 /UG_TITLE=TRANSCRIBED          |             |             |
|                    | CD47 ANTIGEN                                                              |             |             |

|                    |                                                                                                                                                                                                 |             |             |
|--------------------|-------------------------------------------------------------------------------------------------------------------------------------------------------------------------------------------------|-------------|-------------|
| Bt.1577.1.S1_at    | COMPLEMENT COMPONENT 1, Q SUBCOMPONENT, ALPHA POLYPEPTIDE                                                                                                                                       | 0.455861823 | 1.316084046 |
| Bt.15782.1.S1_at   | SIMILAR TO CD59 ANTIGEN P18-20                                                                                                                                                                  | 0.28321651  | 1.460850435 |
| Bt.15794.1.S1_at   | SIMILAR TO METHYL-CPG BINDING DOMAIN PROTEIN 2 ISOFORM 1                                                                                                                                        | 0.086095802 | 1.06984492  |
| Bt.1582.1.S1_at    | HYPOTHETICAL PROTEIN                                                                                                                                                                            | 0.100421004 | 1.036624095 |
| Bt.15837.1.S1_at   | SIMILAR TO PROTEASOME SUBUNIT ALPHA TYPE 6 (PROTEASOME IOTA CHAIN)                                                                                                                              | 0.111859865 | 1.050428718 |
| Bt.15844.1.S1_at   | CYTOSKELETON ASSOCIATED PROTEIN 1                                                                                                                                                               | 0.157515456 | 1.07183078  |
| Bt.15851.1.S1_at   | EUKARYOTIC TRANSLATION INITIATION FACTOR 4A, ISOFORM 2                                                                                                                                          | -0.04763541 | 0.939854573 |
| Bt.15865.1.S1_at   | PROTEASOME SUBUNIT, BETA TYPE 8 [PROSOME, MACROPAIN] [LARGE                                                                                                                                     | 0.104704364 | 1.060915104 |
| Bt.15882.2.S1_a_at | SIMILAR TO SORCIN (22 KDA PROTEIN) (CP-22) (V19)<br>.GB:CK849044 /DB_XREF=GI:45211929 /DB_XREF=971891 /TID=BT.15886.1 /CNT=27<br>/FEA=EST /TIER=STACK /STK=7 /UG=BT.15886 /UG_TITLE=TRANSCRIBED | 0.101299656 | 1.014696196 |
| Bt.15886.1.S1_at   |                                                                                                                                                                                                 | 0.15513752  | 1.052600761 |
| Bt.15903.1.S1_at   | SIMILAR TO THIOPURINE S-METHYLTRANSFERASE (THIOPURINE                                                                                                                                           | 0.205956141 | 1.130149151 |
| Bt.15912.1.S1_at   | HYPOTHETICAL PROTEIN                                                                                                                                                                            | 0.088184122 | 1.084044725 |
| Bt.15931.1.S1_at   | SIMILAR TO RIBOSOMAL PROTEIN L14                                                                                                                                                                | 0.037570548 | 1.014455147 |
| Bt.15968.1.S1_at   | .GB:CK975868 /DB_XREF=GI:45493842 /DB_XREF=4107148 /CLONE=9BOV33_J03                                                                                                                            | -0.54707624 | 0.694126553 |
| Bt.15975.1.A1_at   | SUPEROXIDE DISMUTASE 1, SOLUBLE                                                                                                                                                                 | 0.14480662  | 1.064252513 |
| Bt.16018.1.S1_a_at | CASPASE 4, APOPTOSIS-RELATED CYSTEINE PROTEASE                                                                                                                                                  | 0.114308117 | 1.05856876  |
| Bt.16025.1.S1_at   | CYTOCHROME C OXYDASE SUBUNIT 4                                                                                                                                                                  | 0.082472108 | 1.019188303 |
| Bt.16032.1.S1_at   | ANNEXIN I                                                                                                                                                                                       | -0.01651514 | 0.998545899 |
| Bt.16039.1.S1_at   | SIMILAR TO 30 KDA PROTEIN                                                                                                                                                                       | 0.140474482 | 1.085201647 |
| Bt.16040.1.S1_at   | SH3 DOMAIN BINDING GLUTAMIC ACID-RICH PROTEIN LIKE 3                                                                                                                                            | 0.049986543 | 1.044133302 |
| Bt.16048.1.S1_at   | PROTEOGLYCAN 1 PRECURSOR-LIKE<br>.GB:AV604129 /DB_XREF=GI:9734502 /DB_XREF=AV604129 /CLONE=E1KI020H09<br>/TID=BT.16070.1 /CNT=4 /FEA=EST /TIER=CONSEND /STK=1 /UG=BT.16070                      | -0.03972847 | 0.994938908 |
| Bt.16070.1.S1_at   |                                                                                                                                                                                                 | 0.071219412 | 1.008356575 |
| Bt.16070.3.A1_at   | .GB:AV594085 /DB_XREF=GI:9710482 /DB_XREF=AV594085 /CLONE=E1CA011E07<br>/TID=BT.16070.3 /CNT=1 /FEA=EST /TIER=CONSEND /STK=1 /UG=BT.16070                                                       | 1.021301036 | 1.091849534 |
| Bt.16072.1.S1_at   | SERINE INCORPORATOR 2                                                                                                                                                                           | -0.12010112 | 0.92403544  |
| Bt.16101.1.S1_at   | GRANULYSIN                                                                                                                                                                                      | -0.33473666 | 0.72031426  |
| Bt.16101.1.S1_s_at | GRANULYSIN                                                                                                                                                                                      | -0.37124488 | 0.674933003 |
| Bt.16118.1.S1_at   | SIMILAR TO C-TYPE LECTIN DOMAIN FAMILY 2, MEMBER E                                                                                                                                              | -0.02308489 | 0.973968816 |
| Bt.16126.1.S1_at   | .GB:CK973853 /DB_XREF=GI:45491827 /DB_XREF=4104739 /CLONE=9BOV28_E18                                                                                                                            | -0.19085677 | 0.862149077 |
| Bt.16127.1.S1_at   | .GB:CK961787 /DB_XREF=GI:45476167 /DB_XREF=4076107 /CLONE=9BOV10_L20                                                                                                                            | -0.08072415 | 0.946183569 |
| Bt.16132.2.S1_a_at | SIMILAR TO TRANSCRIPTION ELONGATION FACTOR B (SIII), POLYPEPTIDE 1                                                                                                                              | 0.15855103  | 1.088554864 |
| Bt.1617.2.S1_a_at  | CLATHRIN, LIGHT POLYPEPTIDE (LCA)                                                                                                                                                               | 0.122860348 | 1.034087063 |
| Bt.16201.1.S1_at   | SIMILAR TO CALGRANULIN B (MIGRATION INHIBITORY FACTOR-RELATED<br>PROTEIN 14) (MRP-14) (P14) (LEUKOCYTE L1 COMPLEX HEAVY CHAIN) (S100                                                            | 0.25218323  | 1.197046471 |

|                    |                                                                           |             |             |
|--------------------|---------------------------------------------------------------------------|-------------|-------------|
| Bt.16201.2.A1_at   | SIMILAR TO CALGRANULIN B (MIGRATION INHIBITORY FACTOR-RELATED             | 0.372569123 | 1.359733731 |
| Bt.16370.1.S1_at   | PROTEIN 14) (MRP-14) (P14) (LEUKOCYTE L1 COMPLEX HEAVY CHAIN) (S100       | -0.40721429 | 0.719999143 |
| Bt.16425.1.A1_at   | HYPOTHETICAL LOC535023                                                    | 0.209738581 | 1.229001175 |
| Bt.1658.1.S1_at    | ,GB:CB420023 /DB_XREF=GI:29185672 /DB_XREF=592935 /TID=BT.16425.1 /CNT=1  |             |             |
| Bt.16673.1.S1_at   | SIMILAR TO DUAL SPECIFICITY PROTEIN PHOSPHATASE 1 (MAP KINASE             | -0.73467968 | 0.622721047 |
| Bt.1678.1.S1_at    | PHOSPHATASE-1) (MKP-1) (PROTEIN-TYROSINE PHOSPHATASE CL100) (DUAL         |             |             |
| Bt.1679.1.S1_at    | ,GB:CB431657 /DB_XREF=GI:29208917 /DB_XREF=607653 /TID=BT.16673.1 /CNT=8  | 0.339598244 | 1.265249402 |
| Bt.16790.1.S1_at   | /FEA=EST /TIER=CONSEND /STK=3 /UG=BT.16673 /UG_TITLE=TRANSCRIBED          |             |             |
| Bt.16875.1.A1_at   | ,GB:CK775904 /DB_XREF=GI:42732154 /DB_XREF=967044 /TID=BT.1678.1 /CNT=42  | 0.271722278 | 1.156937801 |
| Bt.16887.1.A1_at   | /FEA=EST /TIER=STACK /STK=7 /UG=BT.1678 /UG_TITLE=TRANSCRIBED             | 0.193274965 | 1.144832172 |
| Bt.16916.1.S1_at   | SIMILAR TO 5-AMINOIMIDAZOLE-4-CARBOXAMIDE RIBONUCLEOTIDE                  | -0.15838695 | 0.904093813 |
| Bt.16916.3.S1_at   | RIBOSOMAL PROTEIN L5                                                      | 0.191105933 | 1.193606262 |
| Bt.17036.1.A1_s_at | ,GB:CB424375 /DB_XREF=GI:29194356 /DB_XREF=598623 /TID=BT.16875.1 /CNT=1  | 0.231736578 | 1.108333661 |
| Bt.17090.1.S1_at   | ,GB:CK961353 /DB_XREF=GI:45475733 /DB_XREF=4102439 /CLONE=10BOV9_E22      |             |             |
| Bt.1718.3.S1_at    | ,GB:CB448382 /DB_XREF=GI:29254764 /DB_XREF=702517 /TID=BT.16916.1 /CNT=10 | -0.40485151 | 0.852850884 |
| Bt.17195.1.A1_at   | /FEA=EST /TIER=CONSEND /STK=0 /UG=BT.16916 /UG_TITLE=TRANSCRIBED          |             |             |
| Bt.1729.1.A1_at    | ,GB:CK955508 /DB_XREF=GI:45469888 /DB_XREF=4095428 /CLONE=10BOV34_A19     | -0.59220401 | 0.822923431 |
| Bt.17318.1.S1_at   | /TID=BT.16916.3 /CNT=5 /FEA=EST /TIER=CONSEND /STK=0 /UG=BT.16916         | 0.137193685 | 0.997096084 |
| Bt.17353.1.A1_at   | TRYPTOPHANYL-TRNA SYNTHETASE                                              |             |             |
| Bt.1758.1.S1_at    | ,GB:CK975625 /DB_XREF=GI:45493599 /DB_XREF=4106617 /CLONE=9BOV33_C24      | 0.17133919  | 1.015079939 |
| Bt.17595.2.S1_a_at | /TID=BT.17090.1 /CNT=15 /FEA=EST /TIER=CONSEND /STK=5 /UG=BT.17090        |             |             |
| Bt.1760.1.S1_at    | ,GB:CK973898 /DB_XREF=GI:45491872 /DB_XREF=4104682 /CLONE=9BOV28_C09      | 0.208364914 | 1.164690159 |
| Bt.1768.1.A1_at    | /TID=BT.1718.3 /CNT=6 /FEA=EST /TIER=CONSEND /STK=0 /UG=BT.1718           | -0.14361816 | 0.868122521 |
| Bt.1778.1.S1_at    | ,GB:CB427688 /DB_XREF=GI:29200989 /DB_XREF=603281 /TID=BT.17195.1 /CNT=1  | 0.116107277 | 1.0381379   |
| Bt.17848.1.S1_at   | FERRITIN, LIGHT POLYPEPTIDE                                               | -0.09269404 | 0.909762655 |
| Bt.17942.1.S1_at   | CKLF-LIKE MARVEL TRANSMEMBRANE DOMAIN CONTAINING 6                        | 0.636571983 | 1.788938219 |
| Bt.17968.1.S1_at   | ,GB:CB428945 /DB_XREF=GI:29203502 /DB_XREF=604718 /TID=BT.17353.1 /CNT=1  | 0.152775681 | 1.051536769 |
| Bt.17999.3.A1_a_at | SIMILAR TO NONHISTONE CHROMOSOMAL PROTEIN HMG-17 (HIGH-MOBILITY           | -0.61839101 | 0.908098473 |
| Bt.1819.1.S1_at    | CHROMOSOME 1 OPEN READING FRAME 37                                        | 0.42315382  | 1.211798639 |
|                    | SIMILAR TO OLIGORIBONUCLEASE, MITOCHONDRIAL PRECURSOR (SMALL              | 0.157566252 | 1.1195827   |
|                    | SIMILAR TO THO COMPLEX SUBUNIT 4 (THO4) (ALLY OF AML-1 AND LEF-1)         | -0.17453227 | 0.832479949 |
|                    | SIMILAR TO PROTEIN KINASE C BINDING PROTEIN 1 ISOFORM A                   | -0.30035595 | 0.751348978 |
|                    | ,GB:CK773433 /DB_XREF=GI:42727576 /DB_XREF=962073 /TID=BT.17942.1 /CNT=12 | 0.145976624 | 1.096553932 |
|                    | SIMILAR TO 26S PROTEASOME NON-ATPASE REGULATORY SUBUNIT 8 (26S            |             |             |
|                    | ,GB:CK952670 /DB_XREF=GI:45467050 /DB_XREF=4092122 /CLONE=10BOV30_H01     | 0.700237282 | 1.587644615 |
|                    | /TID=BT.17999.3 /CNT=1 /FEA=EST /TIER=CONSEND /STK=1 /UG=BT.17999         | 0.113584186 | 1.107683409 |
|                    | SIMILAR TO UBIQUINOL-CYTOCHROME C REDUCTASE COMPLEX 7.2KDA PROTEIN        |             |             |



|                    |                                                                           |             |             |
|--------------------|---------------------------------------------------------------------------|-------------|-------------|
| Bt.1823.1.S1_at    | PEROXIREDOXIN 1                                                           | 0.220834654 | 1.157400238 |
| Bt.18234.1.S1_at   | SIMILAR TO IMMUNOGLOBULIN SUPERFAMILY, MEMBER 6                           | 0.253747032 | 1.115444161 |
| Bt.18375.1.S1_at   | .GB:CB443472 /DB_XREF=GI:29232531 /DB_XREF=694376 /TID=BT.18375.1 /CNT=2  | 0.364740348 | 1.271312996 |
| Bt.1844.1.S1_at    | .GB:BM104814 /DB_XREF=GI:17035884 /DB_XREF=506074 /TID=BT.1844.1 /CNT=4   | 0.175269543 | 1.137958221 |
| Bt.18469.2.A1_at   | .GB:CB444924 /DB_XREF=GI:29235438 /DB_XREF=696139 /TID=BT.18469.2 /CNT=1  | -0.22861873 | 0.933962879 |
| Bt.1847.1.S1_at    | /FEA=EST /TIER=CONSEND /STK=1 /UG=BT.18469 /UG_TITLE=TRANSCRIBED          | 0.329778957 | 1.315934822 |
| Bt.1855.1.S1_at    | .GB:CB441122 /DB_XREF=GI:29227826 /DB_XREF=691449 /TID=BT.1847.1 /CNT=3   | 0.156924018 | 1.158371019 |
| Bt.18570.2.A1_s_at | CYSTATIN C (AMYLOID ANGIOPATHY AND CEREBRAL HEMORRHAGE)                   | 0.149115627 | 1.061497565 |
| Bt.18623.1.A1_at   | SIMILAR TO PROTEASOME BETA 2 SUBUNIT                                      | 0.330555517 | 1.292072812 |
| Bt.18689.2.A1_at   | SIMILAR TO MICROTUBULE-ASSOCIATED PROTEIN RP/EB FAMILY MEMBER 2 (APC-     | 0.326351874 | 1.2234504   |
| Bt.18751.1.S1_at   | .GB:CB448793 /DB_XREF=GI:29255175 /DB_XREF=702954 /TID=BT.18689.2 /CNT=1  | 0.133777822 | 1.062653177 |
| Bt.18751.2.A1_s_at | SIMILAR TO PHOSPHATIDYLINOSITOL-4-PHOSPHATE 5-KINASE TYPE II ALPHA        | 0.204772707 | 1.075176542 |
| Bt.18756.1.S1_at   | (PIP5KII-ALPHA) (1-PHOSPHATIDYLINOSITOL-4-PHOSPHATE 5-KINASE)             | 0.332460703 | 1.192155307 |
| Bt.18969.1.S1_at   | SIMILAR TO PHOSPHATIDYLINOSITOL-4-PHOSPHATE 5-KINASE TYPE II ALPHA        | -0.61673237 | 0.645973303 |
| Bt.19161.1.S1_at   | (PIP5KII-ALPHA) (1-PHOSPHATIDYLINOSITOL-4-PHOSPHATE 5-KINASE)             | 0.075473881 | 1.059726181 |
| Bt.19195.1.A1_at   | .GB:BE757079 /DB_XREF=GI:10171071 /DB_XREF=211422 /TID=BT.18756.1 /CNT=10 | 0.176545546 | 1.022495818 |
| Bt.19204.1.S1_at   | /FEA=EST /TIER=CONSEND /STK=0 /UG=BT.18756 /UG_TITLE=TRANSCRIBED          | 0.354988083 | 1.31908001  |
| Bt.1927.1.S1_at    | .GB:CB452339 /DB_XREF=GI:29258721 /DB_XREF=707195 /TID=BT.18969.1 /CNT=3  | -0.31880868 | 0.868934105 |
| Bt.19295.1.S1_at   | SIMILAR TO ACTIVATING TRANSCRIPTION FACTOR 4                              | 1.307247275 | 2.528548963 |
| Bt.19365.1.S1_at   | .GB:CK777838 /DB_XREF=GI:42730151 /DB_XREF=964983 /TID=BT.19195.1 /CNT=5  | -1.06139314 | 0.468325604 |
| Bt.1937.1.S1_at    | /FEA=EST /TIER=CONSEND /STK=2 /UG=BT.19195 /UG_TITLE=TRANSCRIBED          | -0.19821565 | 0.823088369 |
| Bt.19429.2.S1_a_at | .GB:CB458416 /DB_XREF=GI:29264800 /DB_XREF=717065 /TID=BT.19204.1 /CNT=4  | -0.14452379 | 0.951914648 |
| Bt.19706.1.S1_at   | .GB:CK981861 /DB_XREF=GI:45499841 /DB_XREF=4114518 /CLONE=9BOV44_M05      | -0.21976623 | 0.790390431 |
| Bt.19718.1.A1_at   | .GB:CK847570 /DB_XREF=GI:45209199 /DB_XREF=970220 /TID=BT.19295.1 /CNT=6  | 4.565947709 | 0.899529144 |
| Bt.1973.1.S1_at    | SIMILAR TO GRANZYME B PRECURSOR (T-CELL SERINE PROTEASE 1-3E)             | 0.131835206 | 1.05550699  |
| Bt.1978.1.S1_a_at  | (CYTOTOXIC T-LYMPHOCYTE PROTEINASE 2) (LYMPHOCYTE PROTEASE) (SECT)        | 0.077372382 | 1.041418945 |
| Bt.1978.1.S1_at    | .GB:CK771765 /DB_XREF=GI:42725893 /DB_XREF=960153 /TID=BT.1937.1 /CNT=25  | 0.150066199 | 1.023678588 |
| Bt.19807.1.S1_at   | /FEA=EST /TIER=CONSEND /STK=5 /UG=BT.1937 /UG_TITLE=TRANSCRIBED           | 0.180774472 | 1.128075236 |
|                    | .GB:CK978709 /DB_XREF=GI:45496683 /DB_XREF=4110280 /CLONE=9BOV38_L15      |             |             |
|                    | /TID=BT.19429.2 /CNT=3 /FEA=EST /TIER=CONSEND /STK=0 /UG=BT.19429         |             |             |
|                    | .GB:CK972254 /DB_XREF=GI:45490228 /DB_XREF=4102828 /CLONE=9BOV24_F03      |             |             |
|                    | .GB:CB531616 /DB_XREF=GI:29394491 /DB_XREF=754476 /TID=BT.19718.1 /CNT=1  |             |             |
|                    | /FEA=EST /TIER=CONSEND /STK=1 /UG=BT.19718 /UG_TITLE=TRANSCRIBED          |             |             |
|                    | SIMILAR TO SMALL NUCLEAR RIBONUCLEOPROTEIN D2                             |             |             |
|                    | T CELL RECEPTOR, BETA CLUSTER                                             |             |             |
|                    | SIMILAR TO T-CELL RECEPTOR BETA CHAIN C REGION                            |             |             |
|                    | T CELL RECEPTOR, BETA CLUSTER                                             |             |             |

|                    |                                                                                                                                                                        |             |             |
|--------------------|------------------------------------------------------------------------------------------------------------------------------------------------------------------------|-------------|-------------|
| Bt.19845.1.S1_at   | SIMILAR TO SKAP55 HOMOLOGUE<br>.GB:CF764403 /DB_XREF=GI:37713622 /DB_XREF=CES003973 /CLONE=CCL003973 /TID=BT.19845.1 /CNT=6 /FEA=EST /TIER=CONSEND /STK=0 /UG=BT.19845 | 0.201493534 | 1.067776112 |
| Bt.19845.2.A1_at   | .GB:CB535381 /DB_XREF=GI:29402041 /DB_XREF=768798 /TID=BT.19845.2 /CNT=1                                                                                               | 0.11729673  | 1.03133133  |
| Bt.1986.1.S1_at    | SIMILAR TO CYSTATIN B (LIVER THIOL PROTEINASE INHIBITOR) (CPI-B) (STEFIN B)                                                                                            | 0.238879912 | 1.121711074 |
| Bt.19997.1.S1_at   | .GB:CK964923 /DB_XREF=GI:45482897 /DB_XREF=4079807 /CLONE=9BOV18_F24 /TID=BT.19997.1 /CNT=19 /FEA=EST /TIER=STACK /STK=8 /UG=BT.19997                                  | -1.38867548 | 0.056730333 |
| Bt.20.1.S1_at      | NADH DEHYDROGENASE (UBIQUINONE) 1 ALPHA SUBCOMPLEX, 7, 14.5KDA                                                                                                         | 0.140230218 | 1.076633416 |
| Bt.2000.1.S1_s_at  | SIMILAR TO HUNTINGTIN INTERACTING PROTEIN K                                                                                                                            | 0.119376617 | 1.088759201 |
| Bt.20096.2.S1_a_at | SIMILAR TO CASPASE 6 ISOFORM ALPHA PREPROPROTEIN                                                                                                                       | 0.169241099 | 1.134332966 |
| Bt.20113.1.S1_at   | .GB:CK770029 /DB_XREF=GI:42724123 /DB_XREF=958147 /TID=BT.20116.1 /CNT=22 /FEA=EST /TIER=STACK /STK=6 /UG=BT.20116 /UG_TITLE=TRANSCRIBED                               | 0.204572747 | 1.151878959 |
| Bt.20116.1.S1_at   | .GB:AW485306 /DB_XREF=GI:7055412 /DB_XREF=64948 /TID=BT.20132.2 /CNT=2                                                                                                 | -0.86418132 | 0.838169293 |
| Bt.20132.2.S1_at   | SIMILAR TO PRELI                                                                                                                                                       | 0.158297931 | 1.073389988 |
| Bt.20145.1.S1_at   | SIMILAR TO DEHYDROGENASE/REDUCTASE SDR FAMILY MEMBER 7 PRECURSOR                                                                                                       | 0.156402431 | 1.125782253 |
| Bt.20151.1.S1_at   | .GB:CB435760 /DB_XREF=GI:29217112 /DB_XREF=616036 /TID=BT.20164.1 /CNT=75 /FEA=EST /TIER=STACK /STK=6 /UG=BT.20164 /UG_TITLE=TRANSCRIBED                               | 0.783142028 | 2.035495208 |
| Bt.20164.1.S1_at   | .GB:CK770804 /DB_XREF=GI:42724898 /DB_XREF=959020 /TID=BT.20171.1 /CNT=22 /FEA=EST /TIER=STACK /STK=6 /UG=BT.20171 /UG_TITLE=TRANSCRIBED                               | 0.512917648 | 1.365673587 |
| Bt.20171.1.S1_at   | SERINE (OR CYSTEINE) PROTEINASE INHIBITOR, CLADE G (C1 INHIBITOR),                                                                                                     | -0.37549071 | 0.703910078 |
| Bt.20205.1.S1_at   | .GB:CB461072 /DB_XREF=GI:29267456 /DB_XREF=720998 /TID=BT.20210.1 /CNT=15                                                                                              | 0.280101838 | 1.100368598 |
| Bt.20210.1.S1_at   | SIMILAR TO CYSTEINE-RICH MOTOR NEURON 1 PROTEIN PRECURSOR (CRIM-1)                                                                                                     | -0.14376799 | 0.957206956 |
| Bt.20226.1.A1_at   | .GB:BE665547 /DB_XREF=GI:10026138 /DB_XREF=154628 /TID=BT.20245.1 /CNT=24 /FEA=EST /TIER=CONSEND /STK=0 /UG=BT.20245 /UG_TITLE=TRANSCRIBED                             | 0.456139955 | 1.346754907 |
| Bt.20245.1.S1_at   | .GB:CB437738 /DB_XREF=GI:29221046 /DB_XREF=685615 /TID=BT.20308.1 /CNT=2                                                                                               | 0.226730256 | 1.1856954   |
| Bt.20308.1.S1_at   | HYPOTHETICAL LOC510480                                                                                                                                                 | -0.13927406 | 0.862558811 |
| Bt.20356.1.S1_at   | .GB:CB430615 /DB_XREF=GI:29206839 /DB_XREF=606517 /TID=BT.20367.1 /CNT=19 /FEA=EST /TIER=STACK /STK=7 /UG=BT.20367 /UG_TITLE=TRANSCRIBED                               | 0.602098852 | 1.712952014 |
| Bt.20367.1.S1_at   | .GB:CK848774 /DB_XREF=GI:45211432 /DB_XREF=971584 /TID=BT.20371.1 /CNT=27 /FEA=EST /TIER=CONSEND /STK=4 /UG=BT.20371 /UG_TITLE=TRANSCRIBED                             | -0.13288662 | 0.905553135 |
| Bt.20371.1.S1_at   | MICROSOMAL GLUTATHIONE S-TRANSFERASE 1                                                                                                                                 | 0.144022577 | 1.114416978 |
| Bt.20383.1.S1_at   | SIMILAR TO PROTEASOME SUBUNIT BETA TYPE 9 PRECURSOR (PROTEASOME CHAIN 7) (MACROPAIN CHAIN 7) (MULTICATALYTIC ENDOPEPTIDASE COMPLEX                                     | 0.38921215  | 1.342492148 |
| Bt.20416.1.S1_at   | SIMILAR TO DOLICHYL-PHOSPHATE MANNOSYLTRANSFERASE POLYPEPTIDE 2,                                                                                                       | 0.12417047  | 1.034902355 |
| Bt.20421.2.S1_a_at | .GB:CB534856 /DB_XREF=GI:29400989 /DB_XREF=768220 /TID=BT.20472.1 /CNT=14 /FEA=EST /TIER=CONSEND /STK=2 /UG=BT.20472 /UG_TITLE=TRANSCRIBED                             | -0.76058681 | 0.665368799 |
| Bt.20472.1.S1_at   | SIMILAR TO IRON-SULFUR CLUSTER ASSEMBLY ENZYME ISOFORM ISCU2                                                                                                           | 0.289622435 | 1.124360035 |
| Bt.20484.1.S1_at   |                                                                                                                                                                        | 0.217436637 | 1.111726011 |

|                    |                                                                                                                                    |             |             |
|--------------------|------------------------------------------------------------------------------------------------------------------------------------|-------------|-------------|
| Bt.20532.1.S1_at   | SIMILAR TO PROTEASOME SUBUNIT BETA TYPE 9 PRECURSOR (PROTEASOME CHAIN 7) (MACROPAIN CHAIN 7) (MULTICATALYTIC ENDOPEPTIDASE COMPLEX | 0.120973478 | 1.089812017 |
| Bt.20549.1.S1_at   | ,GB:CB464749 /DB_XREF=GI:29271134 /DB_XREF=725980 /TID=BT.20549.1 /CNT=11                                                          |             |             |
| Bt.2055.1.S1_at    | /FEA=EST /TIER=CONSEND /STK=3 /UG=BT.20549 /UG_TITLE=TRANSCRIBED                                                                   | 0.093450773 | 1.092431413 |
| Bt.20562.1.S1_at   | GUANINE NUCLEOTIDE BINDING PROTEIN (G PROTEIN),BETA POLYPEPTIDE 2                                                                  | 0.146251506 | 1.144495089 |
| Bt.20573.1.S1_at   | ,GB:CK975718 /DB_XREF=GI:45493692 /DB_XREF=4106728 /CLONE=9BOV33_H15                                                               |             |             |
| Bt.20604.1.S1_at   | /TID=BT.20562.1 /CNT=54 /FEA=EST /TIER=STACK /STK=17 /UG=BT.20562                                                                  | 0.19352763  | 1.12870498  |
| Bt.20778.2.S1_at   | ,GB:CB456419 /DB_XREF=GI:29262801 /DB_XREF=713678 /TID=BT.20573.1 /CNT=6                                                           | -0.18052798 | 0.86089416  |
| Bt.20888.1.S1_at   | SIMILAR TO THREONYL-TRNA SYNTHETASE                                                                                                | 0.061237493 | 0.996574414 |
| Bt.20895.1.S1_at   | SIMILAR TO TG-INTERACTING FACTOR ISOFORM A                                                                                         | -1.34654617 | 0.839640776 |
| Bt.209.3.S1_at     | ,GB:CB464973 /DB_XREF=GI:29271358 /DB_XREF=726225 /TID=BT.20888.1 /CNT=3                                                           | 0.954998343 | 1.894653626 |
| Bt.20905.1.S1_at   | HYPOTHETICAL PROTEIN                                                                                                               | 0.154842944 | 1.072508107 |
| Bt.2091.1.S1_at    | LYSOZYME, MACROPHAGE                                                                                                               | 0.058924453 | 1.014995028 |
| Bt.20925.1.S1_at   | ,GB:CB451376 /DB_XREF=GI:29257758 /DB_XREF=706140 /TID=BT.20905.1 /CNT=25                                                          |             |             |
| Bt.20971.1.S1_at   | /FEA=EST /TIER=STACK /STK=6 /UG=BT.20905 /UG_TITLE=TRANSCRIBED                                                                     | -0.19591274 | 0.857819212 |
| Bt.20986.1.S1_at   | ,GB:CK846550 /DB_XREF=GI:45207173 /DB_XREF=969056 /TID=BT.2091.1 /CNT=50                                                           |             |             |
| Bt.21012.3.S1_a_at | /FEA=EST /TIER=STACK /STK=8 /UG=BT.2091 /UG_TITLE=TRANSCRIBED                                                                      | -0.85302265 | 0.590270253 |
| Bt.2109.1.S1_at    | MAJOR HISTOCOMPATIBILITY COMPLEX, CLASS II, DQ BETA                                                                                | -1.58792813 | 0.054172484 |
| Bt.2116.1.S1_at    | CALPAIN, LARGE POLYPEPTIDE L2                                                                                                      | 0.169448144 | 1.126690408 |
| Bt.21173.1.S1_at   | TUMOR SUPPRESSOR DELETED IN ORAL CANCER-RELATED 1                                                                                  | 0.146016336 | 1.063728282 |
| Bt.21220.1.S1_at   | SIMILAR TO F32D8.4                                                                                                                 | -0.92426559 | 0.758103549 |
| Bt.21224.1.S1_at   | ,GB:CK849902 /DB_XREF=GI:45213570 /DB_XREF=973072 /TID=BT.2109.1 /CNT=15                                                           |             |             |
| Bt.21368.1.S1_s_at | /FEA=EST /TIER=STACK /STK=9 /UG=BT.2109 /UG_TITLE=TRANSCRIBED                                                                      | 0.084750947 | 1.039028937 |
| Bt.21374.2.S1_a_at | SEQUENCE WITH STRONG SIMILARITY TO PROTEIN REF:NP_037415.1 (H.SAPIENS)                                                             | 0.221367262 | 1.117134714 |
| Bt.21379.2.S1_at   | PROTEASOME (PROSOME, MACROPAIN) SUBUNIT, BETA TYPE, 6                                                                              |             |             |
| Bt.21387.1.S1_at   | ,GB:AV594776 /DB_XREF=GI:9711175 /DB_XREF=AV594776 /CLONE=E1CA015G05                                                               |             |             |
|                    | /TID=BT.21173.1 /CNT=3 /FEA=EST /TIER=CONSEND /STK=0 /UG=BT.21173                                                                  | -0.61285397 | 0.933741742 |
|                    | ,GB:CK778786 /DB_XREF=GI:42731099 /DB_XREF=965957 /TID=BT.21220.1 /CNT=5                                                           |             |             |
|                    | /FEA=EST /TIER=CONSEND /STK=1 /UG=BT.21220 /UG_TITLE=TRANSCRIBED                                                                   | 0.313752229 | 1.10783279  |
|                    | ,GB:CB452167 /DB_XREF=GI:29258549 /DB_XREF=707014 /TID=BT.21224.1 /CNT=8                                                           |             |             |
|                    | /FEA=EST /TIER=CONSEND /STK=4 /UG=BT.21224 /UG_TITLE=TRANSCRIBED                                                                   | -0.14708522 | 0.863433811 |
|                    | SIMILAR TO IMMUNOGLOBULIN LAMBDA-LIKE POLYPEPTIDE 1 PRECURSOR                                                                      |             |             |
|                    | (IMMUNOGLOBULIN-RELATED 14.1 PROTEIN) (IMMUNOGLOBULIN OMEGA                                                                        | 0.197985587 | 1.150444984 |
|                    | SIMILAR TO APG3P                                                                                                                   | 0.182602226 | 1.132360251 |
|                    | ,GB:BE755355 /DB_XREF=GI:10169347 /DB_XREF=209172 /TID=BT.21379.2 /CNT=2                                                           | 0.582105551 | 1.330798001 |
|                    | ,GB:CB429918 /DB_XREF=GI:29205444 /DB_XREF=605767 /TID=BT.21387.1 /CNT=10                                                          | 0.320728513 | 1.17326006  |

|                    |                                                                           |             |             |
|--------------------|---------------------------------------------------------------------------|-------------|-------------|
| Bt.21431.1.S1_at   | .GB:CK948133 /DB_XREF=GI:45462513 /DB_XREF=4073174 /CLONE=10BOV24_M15     | 0.092165157 | 1.080561076 |
| Bt.21459.1.S1_at   | /TID=BT.21431.1 /CNT=16 /FEA=EST /TIER=CONSEND /STK=1 /UG=BT.21431        | -0.85405226 | 0.858943657 |
| Bt.21476.1.S1_at   | HYPOTHETICAL PROTEIN                                                      | 0.267498596 | 1.190337642 |
| Bt.21480.1.A1_s_at | SIMILAR TO CG6878-PA                                                      | 0.108224547 | 1.107853774 |
|                    | .GB:AV618700 /DB_XREF=GI:9754370 /DB_XREF=AV618700 /CLONE=E0RU006E01      |             |             |
|                    | .GB:CK834840 /DB_XREF=GI:45065674 /DB_XREF=4059343 /CLONE=8BOV_7F15       |             |             |
|                    | /TID=BT.21482.1 /CNT=10 /FEA=EST /TIER=CONSEND /STK=0 /UG=BT.21482        |             |             |
| Bt.21482.1.A1_at   | /UG_TITLE=TRANSCRIBED SEQUENCE WITH MODERATE SIMILARITY TO PROTEIN        | -0.61170882 | 0.53699431  |
| Bt.215.1.S1_at     | MAJOR HISTOCOMPATIBILITY COMPLEX, CLASS II, DQ ALPHA                      | -1.73135442 | 0.055613745 |
| Bt.21503.1.S1_at   | PROTEIN PHOSPHATASE 1, CATALYTIC SUBUNIT, ALPHA ISOFORM                   | 0.073438054 | 0.996579059 |
| Bt.21576.1.S1_at   | SIMILAR TO COMPLEMENT C1Q SUBCOMPONENT, C CHAIN PRECURSOR                 | 0.512206881 | 1.30170631  |
| Bt.2158.1.S1_at    | .GB:BI681359 /DB_XREF=GI:15634276 /DB_XREF=460730 /TID=BT.2158.1 /CNT=11  | -0.19623177 | 0.866209549 |
| Bt.2158.2.S1_at    | .GB:BF773657 /DB_XREF=GI:12121494 /DB_XREF=283035 /TID=BT.2158.2 /CNT=2   | -0.22398159 | 0.856624407 |
| Bt.21602.1.S1_at   | SIMILAR TO AXIN 1                                                         | 0.224905862 | 1.097008861 |
|                    | .GB:CK944409 /DB_XREF=GI:45458789 /DB_XREF=4068586 /CLONE=10BOV16_K11     |             |             |
| Bt.21607.1.S1_at   | /TID=BT.21607.1 /CNT=18 /FEA=EST /TIER=CONSEND /STK=0 /UG=BT.21607        | -0.26366723 | 0.792722235 |
| Bt.21635.2.A1_a_at | 26S PROTEASOME P40.5 SUBUNIT                                              | 0.227341154 | 1.170272884 |
| Bt.21685.1.A1_at   | .GB:CK946273 /DB_XREF=GI:45460653 /DB_XREF=4070778 /CLONE=10BOV19_F19     | -0.30232761 | 0.831435477 |
| Bt.2169.1.S1_at    | SIMILAR TO TISSUE ALPHA-L-FUCOSIDASE PRECURSOR (ALPHA-L-FUCOSIDASE I)     | 0.217634028 | 0.923868944 |
| Bt.21724.2.S1_a_at | FARNESYL-DIPHOSPHATE FARNESYLTRANSFERASE 1                                | 0.424262217 | 1.411322992 |
| Bt.21732.1.S1_at   | SIMILAR TO RIBONUCLEASE T2 PRECURSOR (RIBONUCLEASE 6)                     | 0.117157144 | 1.031865699 |
|                    | .GB:CK962844 /DB_XREF=GI:45480818 /DB_XREF=4077439 /CLONE=9BOV12_D08      |             |             |
| Bt.21740.1.S1_at   | /TID=BT.21740.1 /CNT=19 /FEA=EST /TIER=STACK /STK=6 /UG=BT.21740          | -0.08512932 | 0.981089688 |
|                    | .GB:CB461304 /DB_XREF=GI:29267688 /DB_XREF=721258 /TID=BT.21775.1 /CNT=40 |             |             |
| Bt.21775.1.S1_at   | /FEA=EST /TIER=CONSEND /STK=4 /UG=BT.21775 /UG_TITLE=TRANSCRIBED          | -0.14951973 | 0.971328346 |
| Bt.21803.1.A1_at   | SIMILAR TO 5-NUCLEOTIDASE, CYTOSOLIC III ISOFORM 1                        | 0.167757587 | 1.168227627 |
| Bt.21805.1.S1_at   | SIMILAR TO ZINC FINGER, FYVE DOMAIN CONTAINING 21                         | 0.428710571 | 1.320452123 |
| Bt.21820.2.S1_at   | HYPOTHETICAL PROTEIN                                                      | 0.369797085 | 1.249439107 |
| Bt.21836.1.S1_at   | SIMILAR TO SEC61 ALPHA SUBUNIT HOMOLOG                                    | 0.250933019 | 1.164907872 |
| Bt.21866.1.S1_at   | .GB:CB537825 /DB_XREF=GI:29406769 /DB_XREF=775483 /TID=BT.21866.1 /CNT=6  | 0.706027096 | 1.855400507 |
| Bt.21883.1.S1_at   | PLACENTA-SPECIFIC 8                                                       | -0.18768851 | 1.626159952 |
|                    | .GB:BE667577 /DB_XREF=GI:10028168 /DB_XREF=155303 /TID=BT.21931.1 /CNT=10 |             |             |
| Bt.21931.1.S1_at   | /FEA=EST /TIER=CONSEND /STK=0 /UG=BT.21931 /UG_TITLE=TRANSCRIBED          | 0.146495431 | 1.145695622 |
| Bt.21950.1.S1_at   | INOSITOL 1,4,5-TRIPHOSPHATE RECEPTOR, TYPE 1                              | 0.342779263 | 1.599617298 |
| Bt.21950.1.S1_s_at | INOSITOL 1,4,5-TRIPHOSPHATE RECEPTOR, TYPE 1                              | 0.359534999 | 1.510496146 |
| Bt.21975.1.S1_at   | PERFORIN 1 (PORE FORMING PROTEIN)                                         | -0.35106639 | 0.772872657 |

|                    |                                                                                                                                               |             |             |
|--------------------|-----------------------------------------------------------------------------------------------------------------------------------------------|-------------|-------------|
| Bt.21994.1.S1_at   | .GB:CB536687 /DB_XREF=GI:29404644 /DB_XREF=771727 /TID=BT.21994.1 /CNT=10 /FEA=EST /TIER=CONSEND /STK=1 /UG=BT.21994 /UG_TITLE=TRANSCRIBED    | 0.250721235 | 1.087574151 |
| Bt.21996.1.S1_at   | IMMUNOGLOBULIN HEAVY CONSTANT EPSILON                                                                                                         | -0.25785157 | 1.422563127 |
| Bt.22004.1.A1_at   | .GB:CB458586 /DB_XREF=GI:29264970 /DB_XREF=717264 /TID=BT.22004.1 /CNT=3                                                                      | -0.26420401 | 0.840737675 |
| Bt.22009.1.S1_at   | SIMILAR TO CHEMOKINE (C-X-C MOTIF) LIGAND 16                                                                                                  | 0.425072162 | 1.269519212 |
| Bt.22010.1.S1_at   | SIMILAR TO PRO-APOPTOTIC BCL-2 PROTEIN ISOFORM A                                                                                              | 0.209442777 | 1.104381172 |
| Bt.22016.1.S1_at   | .GB:CB165724 /DB_XREF=GI:28151849 /DB_XREF=LHG603001167.R1 /TID=BT.22016.1 /CNT=26 /FEA=EST /TIER=STACK /STK=9 /UG=BT.22016                   | 0.087839545 | 1.046015395 |
| Bt.2203.1.S1_at    | .GB:CK770899 /DB_XREF=GI:42724993 /DB_XREF=959126 /TID=BT.2203.1 /CNT=42 /FEA=EST /TIER=STACK /STK=6 /UG=BT.2203 /UG_TITLE=TRANSCRIBED        | 0.590797827 | 1.452376713 |
| Bt.22050.1.S1_at   | SIMILAR TO TYROSINE-PROTEIN KINASE HCK (P56-HCK/P59-HCK) (HEMOPOIETIC                                                                         | 0.156477017 | 0.961968108 |
| Bt.22108.1.S1_at   | .GB:CK979590 /DB_XREF=GI:45497570 /DB_XREF=4111482 /CLONE=9BOV40_N17 /TID=BT.22108.1 /CNT=15 /FEA=EST /TIER=CONSEND /STK=2 /UG=BT.22108       | 0.192885026 | 1.11017301  |
| Bt.22198.1.S1_at   | GLUTATHIONE S-TRANSFERASE A4                                                                                                                  | 0.904511362 | 1.709170824 |
| Bt.22204.1.A1_at   | .GB:CB438670 /DB_XREF=GI:29222916 /DB_XREF=687548 /TID=BT.22204.1 /CNT=10 /FEA=EST /TIER=CONSEND /STK=4 /UG=BT.22204 /UG_TITLE=TRANSCRIBED    | 0.238418949 | 1.145809912 |
| Bt.22224.1.S1_at   | .GB:BM251510 /DB_XREF=GI:17887102 /DB_XREF=BOTL0100006XH08R .GB:CK954419 /DB_XREF=GI:45468799 /DB_XREF=4094429 /CLONE=10BOV33_H04             | -0.14632028 | 0.908211474 |
| Bt.22243.1.S1_at   | /TID=BT.22243.1 /CNT=26 /FEA=EST /TIER=STACK /STK=7 /UG=BT.22243                                                                              | 0.122034606 | 1.079709699 |
| Bt.22275.1.A1_at   | SIMILAR TO INTERFERON-STIMULATED GENE 20 KDA PROTEIN (PROMYELOCYTIC                                                                           | 0.217250069 | 1.14499616  |
| Bt.22303.1.S1_at   | .GB:CB450627 /DB_XREF=GI:29257009 /DB_XREF=705304 /TID=BT.22303.1 /CNT=2 /FEA=EST /TIER=CONSEND /STK=1 /UG=BT.22303 /UG_TITLE=TRANSCRIBED     | -0.08570673 | 0.930912653 |
| Bt.22329.1.S1_at   | FK506-BINDING PROTEIN 1A                                                                                                                      | 0.192064765 | 1.13066161  |
| Bt.22359.3.S1_at   | SIMILAR TO SUDD SUPPRESSOR OF BIMD6 HOMOLOG ISOFORM 1                                                                                         | -0.38951155 | 0.939149866 |
| Bt.22503.1.A1_at   | SIMILAR TO PROTEIN C21ORF59                                                                                                                   | 0.175706667 | 1.102741008 |
| Bt.22533.1.S1_at   | OXYGEN REGULATED PROTEIN, 150 KDA                                                                                                             | 0.110357874 | 1.083910245 |
| Bt.22568.1.S1_at   | RIBOSOMAL PROTEIN L29                                                                                                                         | 0.018511671 | 0.99942261  |
| Bt.22615.2.A1_a_at | .GB:AV591682 /DB_XREF=GI:9702675 /DB_XREF=AV591682 /CLONE=E1BR020A05 /TID=BT.22615.2 /CNT=4 /FEA=EST /TIER=CONSEND /STK=1 /UG=BT.22615        | 0.194238518 | 1.125758137 |
| Bt.22633.1.S1_at   | .GB:BE667924 /DB_XREF=GI:10028515 /DB_XREF=155865 /TID=BT.22633.1 /CNT=8 .GB:CK979099 /DB_XREF=GI:45497079 /DB_XREF=4110618 /CLONE=9BOV39_J17 | 0.234109335 | 1.067898941 |
| Bt.22636.1.S1_at   | /TID=BT.22636.1 /CNT=16 /FEA=EST /TIER=STACK /STK=6 /UG=BT.22636                                                                              | 0.152153646 | 1.142344576 |
| Bt.22672.1.A1_at   | HYDROXYPROSTAGLANDIN DEHYDROGENASE 15-(NAD)                                                                                                   | -0.69255594 | 0.938831421 |
| Bt.22759.1.S1_at   | .GB:CK846142 /DB_XREF=GI:45206359 /DB_XREF=968611 /TID=BT.22759.1 /CNT=24                                                                     | 0.206637135 | 1.25889368  |
| Bt.22763.2.S1_a_at | 3-HYDROXY-3-METHYLGLUTARYL-COENZYME A SYNTHASE 1                                                                                              | 0.315382056 | 1.320813429 |
| Bt.22767.1.S1_at   | MHC CLASS I HEAVY CHAIN                                                                                                                       | -0.78669635 | 0.449206126 |
| Bt.22772.1.S1_at   | RIBOSOMAL PROTEIN S28                                                                                                                         | 0.021168252 | 1.0125866   |

|                    |                                                                                                                                                  |             |             |
|--------------------|--------------------------------------------------------------------------------------------------------------------------------------------------|-------------|-------------|
| Bt.22783.1.S1_at   | ENOLASE 1                                                                                                                                        | 0.071676973 | 1.041037773 |
| Bt.22803.1.S1_at   | SIMILAR TO TUBULIN, BETA 5<br>.GB:CK847941 /DB_XREF=GI:45209885 /DB_XREF=970638 /TID=BT.22803.1 /CNT=140                                         | 0.304485591 | 1.198031291 |
| Bt.22803.1.S2_at   | /FEA=EST /TIER=STACK /STK=10 /UG=BT.22803 /UG_TITLE=TRANSCRIBED                                                                                  | 0.094115825 | 1.061159404 |
| Bt.22843.1.S1_at   | SIMILAR TO COILED-COIL-HELIX-COILED-COIL-HELIX DOMAIN CONTAINING                                                                                 | 0.105925917 | 1.032624298 |
| Bt.22865.1.S1_at   | RHO FAMILY, SMALL GTP BINDING PROTEIN RAC1                                                                                                       | 0.157160501 | 1.149543611 |
| Bt.22865.1.S2_at   | RHO FAMILY, SMALL GTP BINDING PROTEIN RAC1                                                                                                       | 0.053014601 | 1.042030931 |
| Bt.22867.1.S1_at   | HISTOCOMPATIBILITY COMPLEX, CLASS II, DQ ALPHA, TYPE 1                                                                                           | -0.99117969 | 0.018536448 |
| Bt.22867.1.S1_x_at | HISTOCOMPATIBILITY COMPLEX, CLASS II, DQ ALPHA, TYPE 1                                                                                           | -0.42032827 | 0.648631344 |
| Bt.22867.2.A1_at   | HYPOTHETICAL PROTEIN                                                                                                                             | 1.378783869 | 276.2367281 |
| Bt.22978.1.S1_a_at | INTERFERON INDUCED TRANSMEMBRANE PROTEIN 1 (9-27)                                                                                                | 0.000943242 | 1.003551537 |
| Bt.22978.2.S1_at   | HYPOTHETICAL PROTEIN                                                                                                                             | -0.04140399 | 0.991519825 |
| Bt.23001.1.S1_a_at | SIMILAR TO 40S RIBOSOMAL PROTEIN S20                                                                                                             | 0.039777769 | 1.013518887 |
| Bt.23002.1.S1_s_at | CYTOCHROME C OXIDASE SUBUNIT VIA POLYPEPTIDE 1                                                                                                   | 0.111495851 | 1.086879165 |
| Bt.2307.1.S1_s_at  | SIMILAR TO CYTOPLASMIC DYNEIN LIGHT CHAIN 1                                                                                                      | 0.079889402 | 1.127952167 |
| Bt.23097.3.S1_at   | .GB:BE755225 /DB_XREF=GI:10169217 /DB_XREF=208988 /TID=BT.23097.3 /CNT=3                                                                         | 0.262959493 | 1.264286128 |
| Bt.231.1.S1_at     | THIOREDOXIN                                                                                                                                      | 0.224136319 | 1.14270295  |
| Bt.23123.1.S1_at   | DIFFERENTIATED EMBRYO CHONDROCYTE EXPRESSED GENE 1                                                                                               | 0.232501419 | 1.125497099 |
| Bt.23161.2.A1_at   | HEAT SHOCK 70 KD PROTEIN 1                                                                                                                       | 0.850354709 | 1.581668347 |
| Bt.23170.1.S1_at   | HETEROGENEOUS NUCLEAR RIBONUCLEOPROTEIN F                                                                                                        | -0.04001152 | 0.971142002 |
| Bt.23172.2.S1_at   | RIBOSOMAL PROTEIN S23                                                                                                                            | -0.02436825 | 0.972430015 |
| Bt.23173.1.S1_at   | HYPOTHETICAL PROTEIN                                                                                                                             | 0.125310732 | 1.117561029 |
| Bt.23174.1.S1_at   | SIMILAR TO CD74 ANTIGEN ISOFORM B                                                                                                                | 0.015379018 | 1.000285538 |
| Bt.23174.2.S1_at   | CHLORIDE INTRACELLULAR CHANNEL 1                                                                                                                 | 0.073669619 | 1.037998314 |
| Bt.23179.1.S2_at   | HEAT SHOCK 90KD PROTEIN 1, ALPHA                                                                                                                 | 0.074215042 | 1.073696261 |
| Bt.23180.1.S1_at   | PROFILIN 1                                                                                                                                       | 0.097639591 | 1.06649027  |
| Bt.23182.1.S1_at   | FARNESYL DIPHOSPHATE SYNTHASE (FARNESYL PYROPHOSPHATE                                                                                            | 0.342562339 | 1.308047409 |
| Bt.23192.1.S1_at   | ACTIN RELATED PROTEIN 2/3 COMPLEX, SUBUNIT 1B, 41KDA                                                                                             | 0.10959225  | 1.100249496 |
| Bt.23212.1.S1_at   | SIMILAR TO C-4 METHYLSTEROL OXIDASE (METHYLSTEROL MONOOXYGENASE)                                                                                 | 0.246839187 | 1.18365728  |
| Bt.23227.1.S1_at   | .GB:CK960999 /DB_XREF=GI:45475379 /DB_XREF=4102171 /CLONE=10BOV9_J18<br>.GB:AW653573 /DB_XREF=GI:7419399 /DB_XREF=102328 /TID=BT.23236.1 /CNT=18 | 0.156055077 | 1.135794026 |
| Bt.23236.1.A1_at   | /FEA=EST /TIER=CONSEND /STK=0 /UG=BT.23236 /UG_TITLE=TRANSCRIBED                                                                                 | -0.05596482 | 0.944505582 |
| Bt.23250.2.S1_at   | L-ARGININE:GLYCINE AMIDINOTRANSFERASE<br>.GB:BP107597 /DB_XREF=GI:28309885 /DB_XREF=BP107597 /CLONE=ORCS10973                                    | 0.796421085 | 1.554964016 |
| Bt.23256.1.S1_at   | /TID=BT.23256.1 /CNT=79 /FEA=EST /TIER=STACK /STK=29 /UG=BT.23256<br>.GB:CB170873 /DB_XREF=GI:28157001 /DB_XREF=IBC602600677.R1 /TID=BT.23263.1  | -0.01811168 | 0.997570942 |
| Bt.23263.1.S1_s_at | /CNT=112 /FEA=EST /TIER=STACK /STK=40 /UG=BT.23263                                                                                               | 0.098889794 | 1.073260313 |

|                    |                                                                                                                                                                                                              |             |             |
|--------------------|--------------------------------------------------------------------------------------------------------------------------------------------------------------------------------------------------------------|-------------|-------------|
| Bt.23268.1.S1_at   | NIEMANN-PICK DISEASE, TYPE C2                                                                                                                                                                                | 0.261051211 | 1.253475615 |
| Bt.23277.1.A1_at   | .GB:CK849163 /DB_XREF=GI:45212154 /DB_XREF=972026 /TID=BT.23277.1 /CNT=9 /FEA=EST /TIER=CONSEND /STK=5 /UG=BT.23277 /UG_TITLE=TRANSCRIBED                                                                    | -0.24627436 | 0.770268193 |
| Bt.23277.3.S1_a_at | .GB:CK953829 /DB_XREF=GI:45468209 /DB_XREF=4093653 /CLONE=10BOV32_G20 /TID=BT.23277.3 /CNT=17 /FEA=EST /TIER=CONSEND /STK=3 /UG=BT.23277                                                                     | -0.13063035 | 0.875924466 |
| Bt.23278.1.S1_at   | ALLOGRAFT INFLAMMATORY FACTOR 1                                                                                                                                                                              | 0.508622485 | 1.355691393 |
| Bt.23291.1.S1_at   | .GB:CB530156 /DB_XREF=GI:29391563 /DB_XREF=736926 /TID=BT.23291.1 /CNT=53 /FEA=EST /TIER=STACK /STK=10 /UG=BT.23291 /UG_TITLE=TRANSCRIBED                                                                    | 0.064373423 | 1.013399727 |
| Bt.23296.1.S1_at   | HISTOCOMPATIBILITY COMPLEX, CLASS II, DQ ALPHA, TYPE 1                                                                                                                                                       | -0.26242033 | 0.711723387 |
| Bt.23310.1.S1_at   | SMALL NUCLEAR RIBONUCLEOPROTEIN POLYPEPTIDE B/B' ISOFORM B'                                                                                                                                                  | 0.120771167 | 1.064526533 |
| Bt.23314.1.A1_s_at | HETEROGENEOUS NUCLEAR RIBONUCLEOPROTEIN F                                                                                                                                                                    | -0.1071007  | 0.937299918 |
| Bt.23326.1.S1_at   | SIMILAR TO ACTIN, CYTOPLASMIC 2 (GAMMA-ACTIN)                                                                                                                                                                | 0.035774183 | 1.000401183 |
| Bt.23326.2.A1_at   | ACTIN, CYTOPLASMIC 2                                                                                                                                                                                         | 0.585863747 | 1.236950287 |
| Bt.23335.1.S1_at   | .GB:CF614104 /DB_XREF=GI:37239530 /DB_XREF=CES013519 /CLONE=CCL011299 (NULL) /TID=BT.23335.1 /CNT=9 /FEA=EST /TIER=CONSEND /STK=0 /UG=BT.23335                                                               | -0.061966   | 0.947199996 |
| Bt.23342.1.S1_at   | SIMILAR TO ADAPTOR-RELATED PROTEIN COMPLEX 1, MU 2 SUBUNIT (MU-ADAPTIN 2) (ADAPTOR PROTEIN COMPLEX AP-1 MU-2 SUBUNIT) (GOLGI ADAPTOR                                                                         | -0.20626346 | 0.873449869 |
| Bt.23348.1.S1_a_at | INOSITOL 1,4,5-TRIPHOSPHATE RECEPTOR, TYPE 1                                                                                                                                                                 | 0.344654034 | 1.460947199 |
| Bt.23348.2.S1_a_at | INOSITOL 1,4,5-TRIPHOSPHATE RECEPTOR, TYPE 1                                                                                                                                                                 | 0.402012774 | 1.514971843 |
| Bt.23361.1.S1_at   | SIMILAR TO UBIQUINOL-CYTOCHROME C REDUCTASE BINDING PROTEIN                                                                                                                                                  | 0.125195185 | 1.138522851 |
| Bt.23381.1.S1_at   | RIBOSOMAL PROTEIN L10A                                                                                                                                                                                       | 0.025684025 | 1.00968533  |
| Bt.23399.1.S1_at   | SIMILAR TO PYRUVATE KINASE, ISOZYMES M1/M2 (PYRUVATE KINASE MUSCLE                                                                                                                                           | 0.194293137 | 1.212280618 |
| Bt.234.1.S1_at     | INTERLEUKIN 18 (INTERFERON-GAMMA-INDUCING FACTOR)                                                                                                                                                            | 0.472420174 | 1.453815373 |
| Bt.2340.1.S1_at    | SCOTIN                                                                                                                                                                                                       | 0.249607773 | 1.196535614 |
| Bt.23401.1.S1_at   | SIMILAR TO FOUR AND A HALF LIM DOMAINS PROTEIN 1 (FHL-1) (SKELETAL                                                                                                                                           | 0.10735182  | 1.087518651 |
| Bt.23405.1.S1_at   | C6ORF49-LIKE PROTEIN                                                                                                                                                                                         | 0.200754646 | 1.126798477 |
| Bt.2342.1.S1_at    | .GB:CK946927 /DB_XREF=GI:45461307 /DB_XREF=4071584 /CLONE=10BOV1_H09 .GB:CF763275 /DB_XREF=GI:37712493 /DB_XREF=CES006079 /CLONE=CCL006079 /TID=BT.23465.1 /CNT=6 /FEA=EST /TIER=CONSEND /STK=3 /UG=BT.23465 | -0.12201649 | 0.912598486 |
| Bt.23465.1.S1_at   |                                                                                                                                                                                                              | -4.62835729 | 2.367967216 |
| Bt.23488.1.S1_at   | SIMILAR TO PROPERDIN P FACTOR, COMPLEMENT                                                                                                                                                                    | 0.281724387 | 1.265491518 |
| Bt.23490.1.S1_at   | SIMILAR TO RIBOSOMAL PROTEIN L30                                                                                                                                                                             | 0.024568557 | 1.005270664 |
| Bt.23496.1.S1_at   | HYPOTHETICAL PROTEIN                                                                                                                                                                                         | 0.094989318 | 1.026097736 |
| Bt.23512.1.S1_at   | SIMILAR TO EUKARYOTIC TRANSLATION INITIATION FACTOR 3, SUBUNIT 12                                                                                                                                            | 0.143513156 | 1.059990213 |
| Bt.23522.1.S1_at   | INTEGRAL MEMBRANE PROTEIN 2B                                                                                                                                                                                 | 0.137752846 | 1.140435224 |
| Bt.23527.1.S1_at   | HYPOTHETICAL PROTEIN                                                                                                                                                                                         | 0.327359872 | 1.155633502 |
| Bt.23529.1.S1_at   | .GB:CK728106 /DB_XREF=GI:42581620 /DB_XREF=BEND_0A02-006-D02 /TID=BT.23529.1 /CNT=9 /FEA=EST /TIER=CONSEND /STK=1 /UG=BT.23529                                                                               | 0.077661731 | 1.0447988   |

|                    |                                                                                                                                                                                                   |             |             |
|--------------------|---------------------------------------------------------------------------------------------------------------------------------------------------------------------------------------------------|-------------|-------------|
| Bt.23542.1.S1_at   | .GB:BI773839 /DB_XREF=GI:15774816 /DB_XREF=465552 /TID=BT.23542.1 /CNT=21 /FEA=EST /TIER=CONSEND /STK=1 /UG=BT.23542 /UG_TITLE=TRANSCRIBED                                                        | 0.215623484 | 1.10957321  |
| Bt.23548.1.S1_at   | HYPOTHETICAL PROTEIN                                                                                                                                                                              | 0.02505141  | 1.006869748 |
| Bt.23550.1.S1_at   | PUTATIVE DIACYLGLYCEROL O-ACYLTRANSFERASE                                                                                                                                                         | -0.15790448 | 0.898839661 |
| Bt.23580.1.S1_at   | .GB:CF764503 /DB_XREF=GI:37713722 /DB_XREF=CES003771 /CLONE=CCL003771 /TID=BT.23580.1 /CNT=3 /FEA=EST /TIER=CONSEND /STK=2 /UG=BT.23580                                                           | -4.16185932 | 0.556459672 |
| Bt.23589.2.S1_at   | INOSITOL 1,4,5-TRIPHOSPHATE RECEPTOR, TYPE 1                                                                                                                                                      | -0.14739251 | 0.816520623 |
| Bt.23590.1.S1_at   | SIMILAR TO DNA-DIRECTED RNA POLYMERASE I 16 KDA POLYPEPTIDE (RPA16)                                                                                                                               | 0.176132391 | 1.107998332 |
| Bt.23603.1.S1_a_at | F-BOX PROTEIN 9                                                                                                                                                                                   | 0.090893336 | 1.085449043 |
| Bt.23603.2.S1_a_at | F-BOX PROTEIN 9                                                                                                                                                                                   | 0.248410027 | 1.166616808 |
| Bt.23603.3.S1_at   | F-BOX PROTEIN 9                                                                                                                                                                                   | 0.149958198 | 1.062377051 |
| Bt.23619.1.S1_a_at | .GB:CK948126 /DB_XREF=GI:45462506 /DB_XREF=4072946 /CLONE=10BOV24_A03 /TID=BT.23619.1 /CNT=4 /FEA=EST /TIER=CONSEND /STK=1 /UG=BT.23619                                                           | 0.090300942 | 1.205763878 |
| Bt.2366.1.S1_at    | SIMILAR TO VESICLE-ASSOCIATED MEMBRANE PROTEIN 8                                                                                                                                                  | 0.250869699 | 1.201742428 |
| Bt.23669.1.A1_at   | .GB:BF601395 /DB_XREF=GI:11698617 /DB_XREF=266363 /TID=BT.23669.1 /CNT=5                                                                                                                          | 0.346638296 | 1.280338073 |
| Bt.2404.1.S1_at    | SIMILAR TO MITOGEN-ACTIVATED PROTEIN KINASE KINASE 1 INTERACTING SIMILAR TO PHOSPHATIDYLINOSITOL-4-PHOSPHATE 5-KINASE TYPE II ALPHA (PIP5KII-ALPHA) (1-PHOSPHATIDYLINOSITOL-4-PHOSPHATE 5-KINASE) | 0.170097916 | 1.070055282 |
| Bt.24074.1.A1_at   | .GB:CK846762 /DB_XREF=GI:45207596 /DB_XREF=969305 /TID=BT.24112.1 /CNT=3                                                                                                                          | 0.096979273 | 1.01560096  |
| Bt.24112.1.A1_at   | TESTIS ENHANCED GENE TRANSCRIPT (BAX INHIBITOR 1)                                                                                                                                                 | 0.69539122  | 1.504043674 |
| Bt.2416.1.S1_at    | NUCLEAR FACTOR (ERYTHROID-DERIVED 2), 45KDA                                                                                                                                                       | 0.076705762 | 1.04217496  |
| Bt.24217.1.S1_at   | MYOTROPHIN                                                                                                                                                                                        | 0.169425632 | 1.149469476 |
| Bt.24220.1.S1_at   | .GB:CK947002 /DB_XREF=GI:45461382 /DB_XREF=4071698 /CLONE=10BOV1_M03 /TID=BT.24238.1 /CNT=17 /FEA=EST /TIER=CONSEND /STK=4 /UG=BT.24238                                                           | -0.07197231 | 0.93304176  |
| Bt.24238.1.A1_at   | DIHYDROPYRIMIDINE DEHYDROGENASE                                                                                                                                                                   | 0.240852245 | 1.055437794 |
| Bt.2424.1.S1_at    | .GB:BI849511 /DB_XREF=GI:15962030 /DB_XREF=476924 /TID=BT.24417.1 /CNT=5                                                                                                                          | 0.396871594 | 1.184801318 |
| Bt.24417.1.A1_at   | .GB:CF930364 /DB_XREF=GI:38279532 /DB_XREF=CF-03-R-K24 /TID=BT.24417.2                                                                                                                            | 0.081379494 | 1.054054124 |
| Bt.24417.2.S1_at   | .GB:BF651419 /DB_XREF=GI:11916549 /DB_XREF=274202 /TID=BT.24449.2 /CNT=2 /FEA=EST /TIER=CONSEND /STK=0 /UG=BT.24449 /UG_TITLE=TRANSCRIBED                                                         | 0.117881547 | 1.022076975 |
| Bt.24449.2.S1_at   | .GB:CK777500 /DB_XREF=GI:42729813 /DB_XREF=964625 /TID=BT.24480.1 /CNT=7                                                                                                                          | -1.88826514 | 0.802450377 |
| Bt.24480.1.S1_at   | ATPASE, H+ TRANSPORTING, LYSOSOMAL 9KDA, V0 SUBUNIT E                                                                                                                                             | -0.29284435 | 0.829701565 |
| Bt.2450.1.S1_at    | SIMILAR TO KRUPPEL-LIKE FACTOR 6                                                                                                                                                                  | 0.193788758 | 1.117605589 |
| Bt.24522.2.S1_at   | SIMILAR TO KRUPPEL-LIKE FACTOR 6                                                                                                                                                                  | -0.36806723 | 0.803521844 |
| Bt.24522.3.S1_a_at | .GB:BM434219 /DB_XREF=GI:18455941 /DB_XREF=1RT05A08 /TID=BT.2466.1 /CNT=6 /FEA=EST /TIER=CONSEND /STK=0 /UG=BT.2466 /UG_TITLE=TRANSCRIBED                                                         | -0.38343636 | 0.734010935 |
| Bt.2466.1.S1_at    | .GB:BI681515 /DB_XREF=GI:15634436 /DB_XREF=460928 /TID=BT.24665.1 /CNT=6                                                                                                                          | 0.293349169 | 1.246544304 |
| Bt.24665.1.S1_at   | LYSOSOMAL-ASSOCIATED MEMBRANE PROTEIN 1                                                                                                                                                           | -0.1479383  | 0.947137461 |
| Bt.24674.1.A1_s_at |                                                                                                                                                                                                   | 0.118046819 | 1.088393858 |



|                    |                                                                                                                                                                                                            |             |             |
|--------------------|------------------------------------------------------------------------------------------------------------------------------------------------------------------------------------------------------------|-------------|-------------|
| Bt.247.1.S1_at     | ANNEXIN A5                                                                                                                                                                                                 | 0.196774277 | 1.166796214 |
| Bt.2474.1.S1_at    | FUSION, DERIVED FROM T(12;16) MALIGNANT LIPOSARCOMA                                                                                                                                                        | -0.10581389 | 0.956967032 |
| Bt.24750.2.S1_a_at | ENDOTHELIN CONVERTING ENZYME 1<br>.GB:CK770702 /DB_XREF=GI:42724796 /DB_XREF=958908 /TID=BT.24760.1 /CNT=14                                                                                                | 0.137197725 | 1.094349645 |
| Bt.24760.1.S1_at   | /FEA=EST /TIER=CONSEND /STK=3 /UG=BT.24760 /UG_TITLE=TRANSCRIBED                                                                                                                                           | 0.342788147 | 0.83811548  |
| Bt.24795.1.A1_at   | SIMILAR TO INTERFERON-INDUCED PROTEIN WITH TETRATRICOPEPTIDE                                                                                                                                               | 0.639579217 | 1.712741734 |
| Bt.24884.2.S1_at   | SIMILAR TO GRANULOCYTE-MACROPHAGE COLONY-STIMULATING FACTOR                                                                                                                                                | 0.467110763 | 1.169375745 |
| Bt.24986.1.A1_at   | .GB:CK727311 /DB_XREF=GI:42580825 /DB_XREF=BEND_0A01-005-C06<br>.GB:CK979098 /DB_XREF=GI:45497078 /DB_XREF=4110471 /CLONE=9BOV39_D14<br>/TID=BT.25072.1 /CNT=18 /FEA=EST /TIER=CONSEND /STK=1 /UG=BT.25072 | -0.29022269 | 0.811175879 |
| Bt.25072.1.S1_at   | /UG_TITLE=TRANSCRIBED SEQUENCE WITH STRONG SIMILARITY TO PROTEIN<br>.GB:CK772143 /DB_XREF=GI:42726286 /DB_XREF=960585 /TID=BT.25102.1 /CNT=13                                                              | 0.380526161 | 1.38231033  |
| Bt.25102.1.S1_a_at | /FEA=EST /TIER=CONSEND /STK=3 /UG=BT.25102 /UG_TITLE=TRANSCRIBED                                                                                                                                           | -0.07719287 | 1.020755483 |
| Bt.2515.1.S1_at    | H2A HISTONE FAMILY, MEMBER Z                                                                                                                                                                               | 0.185904618 | 1.181636285 |
| Bt.2520.1.S1_at    | .GB:CB460448 /DB_XREF=GI:29266832 /DB_XREF=720334 /TID=BT.2520.1 /CNT=15                                                                                                                                   | -0.1002324  | 0.914984784 |
| Bt.2529.1.S1_at    | METALLOTHIONEIN-2                                                                                                                                                                                          | -0.95145611 | 0.704126857 |
| Bt.25420.1.A1_at   | .GB:CK769833 /DB_XREF=GI:42723927 /DB_XREF=957937 /TID=BT.25420.1 /CNT=3                                                                                                                                   | -0.22774235 | 0.897361031 |
| Bt.2556.1.S1_at    | HYDROXYPROSTAGLANDIN DEHYDROGENASE 15-(NAD)                                                                                                                                                                | -0.82458191 | 0.808959646 |
| Bt.2562.1.S1_at    | GLUCOSE REGULATED PROTEIN 58KD                                                                                                                                                                             | 0.046822624 | 0.974445154 |
| Bt.2573.1.S1_at    | CD9 ANTIGEN (P24)                                                                                                                                                                                          | 0.163386027 | 1.140220554 |
| Bt.2575.1.S1_at    | PROTEASOME ACTIVATOR 28 ALPHA SUBUNIT<br>.GB:CB426311 /DB_XREF=GI:29198229 /DB_XREF=601486 /TID=BT.25887.1 /CNT=4                                                                                          | 0.053131611 | 1.018134605 |
| Bt.25887.1.A1_at   | /FEA=EST /TIER=CONSEND /STK=0 /UG=BT.25887 /UG_TITLE=TRANSCRIBED<br>.GB:CK970235 /DB_XREF=GI:45488209 /DB_XREF=4086019 /CLONE=9BOV31_I20<br>/TID=BT.2590.1 /CNT=12 /FEA=EST /TIER=STACK /STK=6 /UG=BT.2590 | -0.21022752 | 0.810971386 |
| Bt.2590.1.A1_at    | MHC CLASS I ANTIGEN                                                                                                                                                                                        | -0.0671036  | 0.955417257 |
| Bt.2592.1.A1_x_at  | MITOCHONDRIAL NADH:UBIQUINONE OXIDOREDUCTASE B14.7                                                                                                                                                         | 0.183307564 | 1.101309057 |
| Bt.25929.1.A1_at   | .GB:AW267109 /DB_XREF=GI:9257594 /DB_XREF=0601-3 /TID=BT.2600.1 /CNT=3                                                                                                                                     | -1.70518294 | 0.982344495 |
| Bt.2600.1.A1_at    | TCTEL1 PROTEIN                                                                                                                                                                                             | 0.269493281 | 1.168326223 |
| Bt.2612.1.S1_at    | SIMILAR TO UBIQUITOUSLY-EXPRESSED TRANSCRIPT ISOFORM 1                                                                                                                                                     | 0.219169043 | 1.245129325 |
| Bt.26122.2.S1_at   | .GB:CK778525 /DB_XREF=GI:42730838 /DB_XREF=965687 /TID=BT.26149.1 /CNT=2                                                                                                                                   | 0.183045833 | 1.119824584 |
| Bt.26149.1.A1_at   | /FEA=EST /TIER=CONSEND /STK=1 /UG=BT.26155 /UG_TITLE=TRANSCRIBED                                                                                                                                           | 0.544965731 | 1.185374249 |
| Bt.26155.1.A1_at   | HYPOTHETICAL LOC540543                                                                                                                                                                                     | 0.699522396 | 1.533865697 |
| Bt.2625.1.S1_at    | .GB:CK946480 /DB_XREF=GI:45460860 /DB_XREF=4071041 /CLONE=10BOV19_A18                                                                                                                                      | -0.19861231 | 0.838823184 |
| Bt.2641.2.S1_at    | UBIQUINOL-CYTOCHROME C REDUCTASE, RIESKE IRON-SULFUR POLYPEPTIDE 1                                                                                                                                         | 0.084953598 | 1.073756029 |
| Bt.265.1.S1_at     | .GB:BF654164 /DB_XREF=GI:11919296 /DB_XREF=278223 /TID=BT.26533.1 /CNT=6                                                                                                                                   | 0.138965243 | 1.096025257 |
| Bt.26533.1.S1_at   |                                                                                                                                                                                                            | 0.619176876 | 1.445973241 |

|                    |                                                                           |             |             |
|--------------------|---------------------------------------------------------------------------|-------------|-------------|
| Bt.26537.1.S1_at   | LEUCINE RICH REPEAT CONTAINING 33                                         | 0.160248193 | 1.085494508 |
| Bt.2657.1.S1_a_at  | SIMILAR TO UNC-112 RELATED PROTEIN 2 SHORT FORM                           | 0.307317486 | 1.260680467 |
| Bt.2663.1.A1_at    | .GB:CK977831 /DB_XREF=GI:45495805 /DB_XREF=4109160 /CLONE=9BOV37_M23      | 0.442373291 | 1.302167293 |
| Bt.26636.2.S1_at   | /TID=BT.2663.1 /CNT=4 /FEA=EST /TIER=CONSEND /STK=2 /UG=BT.2663           | -1.95300764 | 0.675499677 |
| Bt.26700.1.S1_at   | NATURAL KILLER CELL GROUP 7 SEQUENCE                                      | 0.477157755 | 1.27382064  |
| Bt.26796.1.S1_at   | HISTAMINE N-METHYLTRANSFERASE                                             | -0.47548437 | 0.660220215 |
| Bt.26825.1.A1_at   | .GB:CK776010 /DB_XREF=GI:42732260 /DB_XREF=967152 /TID=BT.26796.1 /CNT=17 | 0.504728534 | 1.45385885  |
| Bt.2686.1.S1_at    | /FEA=EST /TIER=CONSEND /STK=1 /UG=BT.26796 /UG_TITLE=TRANSCRIBED          | 0.066248597 | 1.039550457 |
| Bt.269.1.S1_at     | SIMILAR TO 5-3 EXORIBONUCLEASE 2                                          | 0.20163204  | 1.128530297 |
| Bt.26983.1.S1_at   | SIMILAR TO 40S RIBOSOMAL PROTEIN S16                                      | 0.226654744 | 1.17255883  |
| Bt.27061.1.S1_at   | ATPASE, CA++ TRANSPORTING, TYPE 2C, MEMBER 1                              | -0.1876999  | 0.843174323 |
| Bt.27118.1.A1_at   | .GB:CK776788 /DB_XREF=GI:42733038 /DB_XREF=968151 /TID=BT.26983.1 /CNT=15 | -0.07867493 | 0.950204954 |
| Bt.27261.1.S1_at   | /FEA=EST /TIER=CONSEND /STK=2 /UG=BT.26983 /UG_TITLE=TRANSCRIBED          | 1.19304645  | 2.233136708 |
| Bt.27261.2.S1_at   | .GB:CK770721 /DB_XREF=GI:42724815 /DB_XREF=958929 /TID=BT.27061.1 /CNT=16 | 1.298188983 | 2.355362887 |
| Bt.2728.1.S1_at    | /FEA=EST /TIER=CONSEND /STK=1 /UG=BT.27061 /UG_TITLE=TRANSCRIBED          | -0.21966439 | 0.848768665 |
| Bt.27283.1.S1_x_at | SIMILAR TO TEMPORARILY ASSIGNED GENE NAME FAMILY MEMBER (TAG-58)          | 0.054086518 | 1.013378787 |
| Bt.27285.1.S1_at   | .GB:CK775944 /DB_XREF=GI:42732194 /DB_XREF=967085 /TID=BT.27261.1 /CNT=10 | 0.734247306 | 2.065508869 |
| Bt.27288.1.S1_at   | /FEA=EST /TIER=CONSEND /STK=4 /UG=BT.27261 /UG_TITLE=TRANSCRIBED          | 0.343425554 | 1.293884535 |
| Bt.2729.1.S1_at    | .GB:BM256142 /DB_XREF=GI:17891741 /DB_XREF=518435 /TID=BT.27261.2 /CNT=2  | 0.219371779 | 1.228963252 |
| Bt.27358.1.S1_at   | /FEA=EST /TIER=CONSEND /STK=0 /UG=BT.27261 /UG_TITLE=TRANSCRIBED          | 0.424231331 | 1.39757687  |
| Bt.27358.2.S1_at   | .GB:AU098038 /DB_XREF=GI:9636226 /DB_XREF=AU098038 /CLONE=CLN330          | 0.225693433 | 1.166580041 |
| Bt.27364.1.S1_at   | /TID=BT.2728.1 /CNT=13 /FEA=EST /TIER=CONSEND /STK=0 /UG=BT.2728          | -0.51580042 | 0.676440778 |
| Bt.27382.1.A1_at   | BOLA CLASS I HISTOCOMPATIBILITY ANTIGEN, ALPHA CHAIN BL3-7 PRECURSOR      | -1.26216583 | 0.96815905  |
| Bt.27410.1.S1_at   | .GB:CF930747 /DB_XREF=GI:38280313 /DB_XREF=CF--05-R-A05 /TID=BT.27285.1   | -0.21816696 | 0.875626495 |
| Bt.275.1.S1_at     | .GB:CK834383 /DB_XREF=GI:45064795 /DB_XREF=4058697 /CLONE=8BOV_2J23       | 0.211486235 | 1.150042126 |
| Bt.27675.1.A1_at   | SIMILAR TO ADAPTER-RELATED PROTEIN COMPLEX 3 SIGMA 1 SUBUNIT (SIGMA-      | -1.37676604 | 0.720231764 |
|                    | .GB:BM032243 /DB_XREF=GI:16745813 /DB_XREF=497875 /TID=BT.27358.1 /CNT=4  |             |             |
|                    | /FEA=EST /TIER=CONSEND /STK=0 /UG=BT.27358 /UG_TITLE=TRANSCRIBED          |             |             |
|                    | .GB:CK847463 /DB_XREF=GI:45208986 /DB_XREF=970102 /TID=BT.27358.2 /CNT=2  |             |             |
|                    | /FEA=EST /TIER=CONSEND /STK=1 /UG=BT.27358 /UG_TITLE=TRANSCRIBED          |             |             |
|                    | .GB:CK849718 /DB_XREF=GI:45213200 /DB_XREF=972817 /TID=BT.27364.1 /CNT=9  |             |             |
|                    | .GB:CK847972 /DB_XREF=GI:45209945 /DB_XREF=970670 /TID=BT.27382.1 /CNT=2  |             |             |
|                    | /FEA=EST /TIER=CONSEND /STK=1 /UG=BT.27382 /UG_TITLE=TRANSCRIBED          |             |             |
|                    | .GB:CK846729 /DB_XREF=GI:45207530 /DB_XREF=969265 /TID=BT.27410.1 /CNT=7  |             |             |
|                    | /FEA=EST /TIER=CONSEND /STK=2 /UG=BT.27410 /UG_TITLE=TRANSCRIBED          |             |             |
|                    | NEURAL PRECURSOR CELL EXPRESSED, DEVELOPMENTALLY DOWN-                    |             |             |
|                    | V-KIT HARDY-ZUCKERMAN 4 FELINE SARCOMA VIRAL ONCOGENE HOMOLOG             |             |             |

|                    |                                                                                                                                                                                |             |             |
|--------------------|--------------------------------------------------------------------------------------------------------------------------------------------------------------------------------|-------------|-------------|
| Bt.27696.1.A1_at   | SH3 DOMAIN BINDING GLUTAMIC ACID-RICH PROTEIN LIKE<br>_GB:CK848566 /DB_XREF=GI:45211050 /DB_XREF=971348 /TID=BT.27723.2 /CNT=1                                                 | -0.22032742 | 0.859020516 |
| Bt.27723.2.A1_a_at | /FEA=EST /TIER=CONSEND /STK=1 /UG=BT.27723 /UG_TITLE=TRANSCRIBED                                                                                                               | -0.7594908  | 0.74285721  |
| Bt.27760.1.S1_at   | MAJOR HISTOCOMPATIBILITY COMPLEX, CLASS I, A<br>_GB:CK847894 /DB_XREF=GI:45209789 /DB_XREF=970583 /TID=BT.27822.1 /CNT=3                                                       | 0.648774    | 2.11982815  |
| Bt.27822.1.A1_at   | /FEA=EST /TIER=CONSEND /STK=2 /UG=BT.27822 /UG_TITLE=TRANSCRIBED<br>_GB:CB429221 /DB_XREF=GI:29204054 /DB_XREF=605022 /TID=BT.27822.2 /CNT=9                                   | 0.365569136 | 1.185880467 |
| Bt.27822.2.S1_at   | /FEA=EST /TIER=CONSEND /STK=0 /UG=BT.27822 /UG_TITLE=TRANSCRIBED<br>_GB:CK848230 /DB_XREF=GI:45210422 /DB_XREF=970960 /TID=BT.27886.1 /CNT=17                                  | 0.444752788 | 1.272799605 |
| Bt.27886.1.S1_s_at | /FEA=EST /TIER=CONSEND /STK=2 /UG=BT.27886 /UG_TITLE=TRANSCRIBED<br>_GB:CK848117 /DB_XREF=GI:45210211 /DB_XREF=970831 /TID=BT.27920.1 /CNT=3                                   | 0.324144708 | 1.193553553 |
| Bt.27920.1.A1_at   | _GB:CB170237 /DB_XREF=GI:28156365 /DB_XREF=CEY603161530.R1<br>/TID=BT.27926.1 /CNT=11 /FEA=EST /TIER=CONSEND /STK=3 /UG=BT.27926                                               | 0.582755845 | 1.550775057 |
| Bt.27926.1.S1_at   | CALMODULIN 2                                                                                                                                                                   | 0.179200927 | 1.019860443 |
| Bt.27975.1.S1_s_at | SIMILAR TO T-CELL RECEPTOR ALPHA CHAIN V REGION HPB-MLT PRECURSOR<br>KERATIN 8                                                                                                 | -0.07003481 | 0.931180897 |
| Bt.28004.2.S1_a_at |                                                                                                                                                                                | -0.45224017 | 0.585577719 |
| Bt.28009.1.S1_at   |                                                                                                                                                                                | -0.15208387 | 0.894941737 |
| Bt.28011.1.S1_at   | MAJOR HISTOCOMPATIBILITY COMPLEX, CLASS II, DRB3<br>_GB:CK976492 /DB_XREF=GI:45494466 /DB_XREF=4107484 /CLONE=9BOV34_H03                                                       | 0.041066819 | 0.947772274 |
| Bt.28047.1.A1_at   | /TID=BT.28047.1 /CNT=2 /FEA=EST /TIER=CONSEND /STK=0 /UG=BT.28047<br>_GB:CK953446 /DB_XREF=GI:45467826 /DB_XREF=4093202 /CLONE=10BOV31_E01                                     | 0.988014582 | 1.583687277 |
| Bt.28123.1.S1_at   | /TID=BT.28123.1 /CNT=7 /FEA=EST /TIER=CONSEND /STK=0 /UG=BT.28123                                                                                                              | -0.30082065 | 0.795014668 |
| Bt.2814.1.S1_at    | TYROSINE 3-MONOOXYGENASE/TRYPHOPHAN 5-MONOOXYGENASE ACTIVATION                                                                                                                 | 0.090398877 | 1.087770354 |
| Bt.2816.1.S1_at    | F1FO-ATP SYNTHASE COMPLEX FO MEMBRANE DOMAIN G SUBUNIT<br>_GB:CK957681 /DB_XREF=GI:45472061 /DB_XREF=4098223 /CLONE=10BOV4_F06                                                 | 0.10216723  | 1.054326886 |
| Bt.28164.1.A1_at   |                                                                                                                                                                                | 0.269396659 | 1.207484042 |
| Bt.282.1.S1_at     | VOLTAGE-DEPENDENT ANION CHANNEL 3                                                                                                                                              | 0.197753801 | 1.102751903 |
| Bt.28207.1.S1_at   | SIMILAR TO RING FINGER PROTEIN 19                                                                                                                                              | 0.167424705 | 1.129880922 |
| Bt.2821.1.S1_at    | SIMILAR TO PROTEASOME (PROSOME, MACROPAIN) SUBUNIT, BETA TYPE 7                                                                                                                | 0.203804068 | 1.123888023 |
| Bt.2822.1.S1_at    | SIMILAR TO 60S RIBOSOMAL PROTEIN L8<br>SIMILAR TO SAM-DOMAIN PROTEIN SAMSIN-1 (SAM DOMAIN, SH3 DOMAIN AND<br>NUCLEAR LOCALISATION SIGNALS PROTEIN 1) (SH3-SAM ADAPTOR PROTEIN) | 0.022443446 | 1.026227399 |
| Bt.28225.1.A1_at   | SIMILAR TO SAM-DOMAIN PROTEIN SAMSIN-1 (SAM DOMAIN, SH3 DOMAIN AND<br>NUCLEAR LOCALISATION SIGNALS PROTEIN 1) (SH3-SAM ADAPTOR PROTEIN)                                        | -0.25478232 | 0.793565512 |
| Bt.28225.2.S1_at   |                                                                                                                                                                                | -0.31630804 | 0.773051432 |
| Bt.28226.2.S1_at   | SIMILAR TO TRIAD3 PROTEIN ISOFORM A                                                                                                                                            | -1.32411036 | 0.884133558 |
| Bt.28226.3.A1_s_at | SIMILAR TO TRIAD3 PROTEIN ISOFORM A<br>_GB:CK952708 /DB_XREF=GI:45467088 /DB_XREF=4092065 /CLONE=10BOV30_E16                                                                   | 0.187229693 | 1.110402522 |
| Bt.28279.1.S1_at   | /TID=BT.28279.1 /CNT=21 /FEA=EST /TIER=CONSEND /STK=3 /UG=BT.28279                                                                                                             | -0.11026955 | 0.879822563 |
| Bt.28383.1.S1_at   | GRANULYSIN                                                                                                                                                                     | -0.18109385 | 0.775937768 |

|                    |                                                                       |             |             |
|--------------------|-----------------------------------------------------------------------|-------------|-------------|
| Bt.28390.1.S1_at   | MYOSIN, HEAVY POLYPEPTIDE 7, CARDIAC MUSCLE, BETA                     | -0.15513751 | 0.883915919 |
| Bt.2841.1.S1_at    | TRYPTOPHANYL-TRNA SYNTHETASE                                          | 0.107363196 | 0.958121216 |
| Bt.2841.2.S1_a_at  | TRYPTOPHANYL-TRNA SYNTHETASE                                          | 0.151693484 | 0.987866787 |
| Bt.2844.1.S1_at    | SIMILAR TO N-ACYLNEURAMINATE CYTIDYLYLTRANSFERASE (CMP-N-             | 0.333062015 | 1.213382    |
| Bt.28447.1.S1_x_at | IGM                                                                   | 0.236763187 | 1.128063602 |
| Bt.28449.1.S1_s_at | SIMILAR TO IG GAMMA-1 CHAIN C REGION, MEMBRANE-BOUND FORM             | 0.237119023 | 1.144216559 |
| Bt.2847.1.S1_a_at  | MYOSIN, LIGHT PEPTIDE 6, ALKALI, SMOOTH MUSCLE AND NON-MUSCLE         | 0.142322842 | 1.103197145 |
| Bt.28518.1.S1_at   | PANCREATIC TRYPSIN INHIBITOR                                          | 0.4308993   | 1.523630959 |
| Bt.28518.1.S1_s_at | SPLEEN TRYPSIN INHIBITOR                                              | 0.156886935 | 1.124346429 |
| Bt.28561.1.S1_at   | ,GB:CK962924 /DB_XREF=GI:45480898 /DB_XREF=4077468 /CLONE=9BOV12_E13  | -0.34157806 | 0.795893367 |
| Bt.28624.1.S1_at   | ,GB:CK946867 /DB_XREF=GI:45461247 /DB_XREF=4071708 /CLONE=10BOV1_M13  | 0.154169617 | 1.142279987 |
| Bt.28638.1.A1_at   | ,GB:CK977811 /DB_XREF=GI:45495785 /DB_XREF=4108932 /CLONE=9BOV37_D11  | 1.040506123 | 2.749424335 |
| Bt.28662.1.A1_at   | ,GB:CK975790 /DB_XREF=GI:45493764 /DB_XREF=4106820 /CLONE=9BOV33_L11  | 0.682805488 | 1.749295079 |
| Bt.287.1.S1_at     | RIBONUCLEASE K6                                                       | 0.106692895 | 1.063296624 |
| Bt.2873.1.S1_at    | SIMILAR TO TRANSMEMBRANE PROTEIN 14C                                  | 0.109210772 | 1.07833991  |
| Bt.28732.1.S1_at   | T-CELL RECEPTOR DELTA CHAIN                                           | 0.133576192 | 0.896836002 |
| Bt.28732.1.S1_s_at | T-CELL RECEPTOR DELTA CHAIN                                           | -0.12460637 | 0.933670362 |
| Bt.28761.1.A1_s_at | SULFIDE DEHYDROGENASE LIKE                                            | 0.168245065 | 1.037449287 |
| Bt.2877.1.S1_at    | SIMILAR TO GLUTAREDOXIN-1 (THIOLTRANSFERASE-1) (TTASE-1)              | 0.193887737 | 1.135921836 |
| Bt.2878.1.S1_at    | POLYUBIQUITIN                                                         | -0.05751559 | 0.958720467 |
| Bt.2878.1.S1_x_at  | POLYUBIQUITIN                                                         | -0.02527385 | 0.984487179 |
| Bt.2888.1.S1_at    | OSTEOCLAST STIMULATING FACTOR 1                                       | 0.099515777 | 1.063465215 |
| Bt.28911.1.S1_at   | ART5 PROTEIN                                                          | 0.981169684 | 1.542632206 |
| Bt.28945.1.A1_at   | ,GB:CK947597 /DB_XREF=GI:45461977 /DB_XREF=4072558 /CLONE=10BOV23_P23 | -0.44278379 | 0.617910995 |
| Bt.29002.1.A1_at   | ,GB:CK950115 /DB_XREF=GI:45464495 /DB_XREF=4075162 /CLONE=10BOV2_E11  | -0.38444287 | 0.680193314 |
| Bt.29423.1.A1_at   | ,GB:CK971488 /DB_XREF=GI:45489462 /DB_XREF=4087550 /CLONE=9BOV4_I15   |             |             |
| Bt.2956.1.A1_at    | /TID=BT.29423.1 /CNT=1 /FEA=EST /TIER=CONSEND /STK=1 /UG=BT.29423     | 0.736020145 | 1.776625422 |
| Bt.29689.1.S1_s_at | SIMILAR TO COILED-COIL DOMAIN CONTAINING 23                           | 0.293129299 | 1.245443093 |
|                    | T-CELL RECEPTOR DELTA CHAIN                                           | -0.09189957 | 0.981530779 |
|                    | ,GB:AJ012799.1 /DB_XREF=GI:3892093 /TID=BT.29777.1 /CNT=3 /FEA=MRNA   |             |             |
|                    | /TIER=CONSEND /STK=0 /UG=BT.29777 /UG_TITLE=MRNA FOR GLUTATHIONE-S-   |             |             |
| Bt.29777.1.S1_x_at | TRANSFERASE (GST) SPECIFIC IMMUNOGLOBULIN LIGHT CHAIN VARIABLE        | 0.616597665 | 1.383594198 |
| Bt.2981.1.S1_at    | SIMILAR TO PROTEIN KINASE C RECEPTOR                                  | -0.04201058 | 0.950866576 |
| Bt.29815.1.S1_x_at | MHC CLASS I HEAVY CHAIN                                               | 0.572000911 | 1.577657356 |
| Bt.29821.1.S1_at   | MHC CLASS I HEAVY CHAIN                                               | 0.66408327  | 1.851636973 |
| Bt.29823.1.S1_x_at | MAJOR HISTOCOMPATIBILITY COMPLEX, CLASS I, B                          | -0.07275    | 0.565575511 |
| Bt.29824.1.S1_s_at | MHC CLASS I MOLECULE PRECURSOR                                        | 1.482538697 | 198.6183417 |

|                  |                                                                                                                                           |             |             |
|------------------|-------------------------------------------------------------------------------------------------------------------------------------------|-------------|-------------|
| Bt.29851.1.S1_at | .GB:CK945876 /DB_XREF=GI:45460256 /DB_XREF=4070333 /CLONE=10BOV18_D06 /TID=BT.29851.1 /CNT=7 /FEA=MRNA /TIER=CONSEND /STK=0 /UG=BT.29851  | -0.02802303 | 1.204886865 |
| Bt.2988.1.S1_at  | GUANINE NUCLEOTIDE BINDING PROTEIN (G PROTEIN), GAMMA 11                                                                                  | 0.170273413 | 1.173544032 |
| Bt.3001.1.S1_at  | CHROMOSOME 14 OPEN READING FRAME 147                                                                                                      | 0.540991458 | 1.392633757 |
| Bt.3005.1.S1_at  | LACTATE DEHYDROGENASE B                                                                                                                   | 0.090377015 | 1.007805312 |
| Bt.3036.1.S1_at  | HYPOTHETICAL PROTEIN                                                                                                                      | 0.039835549 | 1.029544454 |
| Bt.3046.2.S1_at  | FICOLIN B                                                                                                                                 | 0.149600361 | 1.084700048 |
| Bt.3079.1.S1_at  | SIMILAR TO ADAPTOR-RELATED PROTEIN COMPLEX 2, MU 1 SUBUNIT ISOFORM B                                                                      | 0.114613198 | 1.046594992 |
| Bt.3091.1.S1_at  | RIBOSOMAL PROTEIN L23                                                                                                                     | 0.024918403 | 1.011970133 |
| Bt.3162.1.S1_at  | PROCOLLAGEN-PROLINE, 2-OXOGLUTARATE 4-DIOXYGENASE                                                                                         | 0.220050666 | 1.180656557 |
| Bt.3193.1.A1_at  | PROTEASOME (PROSOME, MACROPAIN) 26S SUBUNIT, NON-ATPASE, 6                                                                                | 0.235273074 | 1.16252975  |
| Bt.3230.1.A1_at  | AMINOLEVULINATE, DELTA-, SYNTHASE 2 (SIDEROBLASTIC/HYPOCHROMIC .GB:CK982493 /DB_XREF=GI:45500473 /DB_XREF=4115170 /CLONE=9BOV45_O09       | 0.991653732 | 1.706147945 |
| Bt.3240.1.S1_at  | /TID=BT.3240.1 /CNT=36 /FEA=EST /TIER=STACK /STK=9 /UG=BT.3240 SIMILAR TO SET PROTEIN (PHOSPHATASE 2A INHIBITOR I2PP2A) (I-2PP2A)         | 0.204774784 | 1.125773786 |
| Bt.3264.1.S1_at  | (TEMPLATE ACTIVATING FACTOR I) (TAF-I) (HLA-DR ASSOCIATED PROTEIN II)                                                                     | -0.14746586 | 1.023211537 |
| Bt.3288.1.A1_at  | HYPOTHETICAL LOC514374                                                                                                                    | 0.158532286 | 1.085463632 |
| Bt.3311.1.S1_at  | TISSUE INHIBITOR OF METTALOPROTEINASE 2                                                                                                   | -0.3018194  | 0.795009113 |
| Bt.3312.1.S1_at  | .GB:AF004361 /DB_XREF=GI:2653768 /DB_XREF=AF004361 /TID=BT.3312.1 /CNT=11 /FEA=EST /TIER=CONSEND /STK=0 /UG=BT.3312 /UG_TITLE=TRANSCRIBED | 0.405214055 | 1.370603004 |
| Bt.3352.1.S1_at  | AGOUTI PROTEIN                                                                                                                            | 0.58251702  | 1.585297895 |
| Bt.3404.1.S1_at  | RIBOSOMAL PROTEIN L36A                                                                                                                    | 0.098117247 | 1.017893862 |
| Bt.344.1.S1_at   | MAJOR HISTOCOMPATIBILITY COMPLEX, CLASS II, DM ALPHA-CHAIN, EXPRESSED                                                                     | 0.12715348  | 1.098275724 |
| Bt.3487.1.S1_at  | TRIOSEPHOSPHATE ISOMERASE                                                                                                                 | 0.255853079 | 1.170715086 |
| Bt.350.1.S1_at   | MHC CLASS II                                                                                                                              | -0.91597399 | 0.120277646 |
| Bt.350.1.S1_s_at | MHC CLASS II ANTIGEN                                                                                                                      | -0.0718901  | 0.857884837 |
| Bt.350.1.S1_x_at | MHC CLASS II                                                                                                                              | -0.87476384 | 0.132605481 |
| Bt.351.1.S1_at   | CORONIN, ACTIN BINDING PROTEIN, 1A                                                                                                        | 0.034750948 | 1.010476969 |
| Bt.3537.1.S1_at  | SULFOTRANSFERASE FAMILY, CYTOSOLIC, 1A, PHENOL-PREFERRING, MEMBER 1                                                                       | 0.209858345 | 1.108527962 |
| Bt.3562.1.S1_at  | LOW DENSITY LIPOPROTEIN RECEPTOR                                                                                                          | 0.468404968 | 1.278378004 |
| Bt.3567.1.S1_at  | UDP-GLUCOSE PYROPHOSPHORYLASE 2                                                                                                           | 0.125396475 | 1.039437136 |
| Bt.357.1.S1_at   | S100 CALCIUM BINDING PROTEIN A12 (CALGRANULIN C)                                                                                          | 0.157831511 | 1.127069477 |
| Bt.3573.1.S2_at  | EUKARYOTIC TRANSLATION ELONGATION FACTOR 1 ALPHA 1                                                                                        | -0.06477897 | 0.921757996 |
| Bt.3624.1.S1_at  | PROTEASOME (PROSOME, MACROPAIN) SUBUNIT, BETA TYPE, 10                                                                                    | 0.160316792 | 1.154590307 |
| Bt.3626.1.S1_at  | RIBOSOMAL PROTEIN S11                                                                                                                     | -0.03201443 | 0.997215233 |
| Bt.367.1.S1_at   | OXIDISED LOW DENSITY LIPOPROTEIN (LECTIN-LIKE) RECEPTOR 1                                                                                 | 1.308169403 | 1.728751566 |
| Bt.3694.1.S1_at  | ORNITHINE DECARBOXYLASE ANTIZYME 1-LIKE                                                                                                   | 0.0458326   | 1.030068333 |

|                   |                                                                                                                                      |             |             |
|-------------------|--------------------------------------------------------------------------------------------------------------------------------------|-------------|-------------|
| Bt.3729.1.S1_at   | SIMILAR TO S-PHASE KINASE-ASSOCIATED PROTEIN 1A ISOFORM B<br>_GB:CB430832 /DB_XREF=GI:29207272 /DB_XREF=606752 /TID=BT.3734.1 /CNT=8 | 0.06637654  | 1.11713607  |
| Bt.3734.1.A1_at   | /FEA=EST /TIER=STACK /STK=6 /UG=BT.3734 /UG_TITLE=TRANSCRIBED                                                                        | 0.207297449 | 1.21197647  |
| Bt.3742.1.S1_at   | SIMILAR TO SELENOPROTEIN K                                                                                                           | 0.171927764 | 1.076333042 |
| Bt.3750.1.S1_at   | S100 CALCIUM BINDING PROTEIN A11 (CALGIZZARIN)                                                                                       | 0.132340011 | 1.136729024 |
| Bt.380.1.S1_at    | ATPASE INHIBITORY FACTOR 1                                                                                                           | 0.215137488 | 1.142611165 |
| Bt.3800.1.S1_at   | PURINE NUCLEOSIDE PHOSPHORYLASE                                                                                                      | 0.477127504 | 1.35623224  |
| Bt.3805.1.S1_at   | MHC CLASS I JSP.1                                                                                                                    | -0.25254616 | 0.840381101 |
| Bt.3809.1.S1_at   | LACTATE DEHYDROGENASE A                                                                                                              | 0.187842464 | 1.09996454  |
| Bt.3839.1.S1_at   | RIBOSOMAL PROTEIN L10                                                                                                                | 0.031224018 | 1.025315503 |
| Bt.3843.1.S1_at   | IMMUNOGLOBULIN J CHAIN                                                                                                               | 0.184049718 | 1.187330173 |
| Bt.3866.1.S1_at   | DAZ ASSOCIATED PROTEIN 2                                                                                                             | 0.051710309 | 1.063246466 |
| Bt.3867.1.S1_at   | ATP SYNTHASE, H+ TRANSPORTING, MITOCHONDRIAL F0 COMPLEX, SUBUNIT B,                                                                  | 0.087292434 | 1.040637861 |
| Bt.3890.1.S1_at   | TUMOR NECROSIS FACTOR RECEPTOR SUPERFAMILY, MEMBER 1A                                                                                | 0.209129781 | 1.271879031 |
| Bt.391.2.S1_at    | PROTEIN KINASE, CAMP-DEPENDENT, CATALYTIC, BETA                                                                                      | -0.1612426  | 0.919977431 |
| Bt.3921.1.S1_at   | SIMILAR TO RIBOSOMAL PROTEIN S10                                                                                                     | -0.05006385 | 0.96625805  |
| Bt.393.1.S1_at    | CATHEPSIN B                                                                                                                          | 0.197223906 | 1.129967196 |
| Bt.393.1.S2_at    | CATHEPSIN B                                                                                                                          | 0.111049372 | 1.056444467 |
| Bt.3988.1.S1_at   | BENZODIAZEPINE RECEPTOR (PERIPHERAL)                                                                                                 | 0.19151759  | 1.19837799  |
| Bt.400.1.S1_at    | CYTOCHROME C OXIDASE SUBUNIT VIII                                                                                                    | 0.127615997 | 1.029609347 |
| Bt.4012.1.S1_at   | SIMILAR TO RIBOSOMAL PROTEIN L18A                                                                                                    | 0.016800066 | 1.004177072 |
| Bt.4020.1.S1_at   | RNF10 PROTEIN                                                                                                                        | 0.171587795 | 1.119695161 |
| Bt.4053.1.S1_at   | THROMBOXANE A2 RECEPTOR                                                                                                              | -0.54696247 | 0.699115055 |
| Bt.409.1.S1_at    | GUANINE NUCLEOTIDE BINDING PROTEIN (G PROTEIN), GAMMA 5                                                                              | 0.123349439 | 1.128351438 |
| Bt.4093.1.S1_at   | BILIVERDIN REDUCTASE B (FLAVIN REDUCTASE (NADPH))                                                                                    | 0.393844577 | 1.195348384 |
| Bt.4095.1.A1_at   | _GB:CB466670 /DB_XREF=GI:29273055 /DB_XREF=732218 /TID=BT.4095.1 /CNT=6                                                              | -0.35478318 | 0.783297061 |
| Bt.4141.1.S1_at   | COATOMER PROTEIN COMPLEX, SUBUNIT EPSILON                                                                                            | 0.149900719 | 1.098327601 |
| Bt.4150.1.S1_at   | CATENIN, BETA LIKE 1                                                                                                                 | 0.19651139  | 1.117316019 |
| Bt.4184.1.S2_at   | HYPOXIA-INDUCIBLE FACTOR 1, ALPHA SUBUNIT (BASIC HELIX-LOOP-HELIX                                                                    | -0.1400178  | 0.858967185 |
| Bt.4205.1.S1_at   | GLUTATHIONE PEROXIDASE 4 (PHOSPHOLIPID HYDROPEROXIDASE)                                                                              | 0.263374384 | 1.200109164 |
| Bt.4208.1.S1_at   | INTERLEUKIN 8 RECEPTOR, BETA                                                                                                         | 0.16870877  | 1.248068426 |
| Bt.4209.2.S1_a_at | COMPLEMENT COMPONENT 3                                                                                                               | 0.468637966 | 1.29045095  |
| Bt.4213.1.S1_at   | BASIC TRANSCRIPTION FACTOR 3                                                                                                         | 0.066695467 | 1.014193415 |
| Bt.4241.1.S1_at   | RIBOSOMAL PROTEIN S14                                                                                                                | 0.019045234 | 1.010016695 |
| Bt.4242.1.A1_at   | SIMILAR TO N-TERMINAL ASN AMIDASE                                                                                                    | 0.148139175 | 1.114472518 |
| Bt.4310.1.A1_at   | SIMILAR TO REGULATOR OF G-PROTEIN SIGNALING 1 (RGS1) (EARLY RESPONSE                                                                 | -1.20320515 | 0.441641803 |
| Bt.4314.1.S1_at   | ANNEXIN A2                                                                                                                           | 0.274701785 | 1.235134569 |

|                   |                                                                                                                                                                                                                                                                                         |             |             |
|-------------------|-----------------------------------------------------------------------------------------------------------------------------------------------------------------------------------------------------------------------------------------------------------------------------------------|-------------|-------------|
| Bt.4317.1.S1_at   | GLUTATHIONE PEROXIDASE 1                                                                                                                                                                                                                                                                | 0.113524741 | 1.059105747 |
| Bt.4323.1.S1_at   | ARCHAEMETZINCINS-2                                                                                                                                                                                                                                                                      | 0.212940887 | 1.149050645 |
| Bt.4323.2.S1_a_at | ARCHAEMETZINCINS-2                                                                                                                                                                                                                                                                      | 0.25392294  | 1.136071003 |
| Bt.4336.1.S1_at   | D COMPONENT OF COMPLEMENT (ADIPSIN)                                                                                                                                                                                                                                                     | 0.170742354 | 1.074939412 |
| Bt.435.1.S1_at    | TISSUE INHIBITOR OF METTALOPROTEINASE 2                                                                                                                                                                                                                                                 | 0.208860013 | 1.231144788 |
| Bt.4355.1.S1_at   | PEROXIREDOXIN 5                                                                                                                                                                                                                                                                         | 0.264780235 | 1.182896905 |
| Bt.4357.1.S1_at   | TRANSMEMBRANE 4 SUPERFAMILY MEMBER 2                                                                                                                                                                                                                                                    | 0.783173798 | 1.899907115 |
| Bt.4363.1.S1_at   | ,GB:AW652347 /DB_XREF=GI:7418173 /DB_XREF=100288 /TID=BT.4363.1 /CNT=9<br>,GB:AW482029 /DB_XREF=GI:7052135 /DB_XREF=40100 /TID=BT.4388.1 /CNT=26<br>/FEA=EST /TIER=CONSEND /STK=0 /UG=BT.4388 /UG_TITLE=TRANSCRIBED                                                                     | -0.88986356 | 0.81959729  |
| Bt.4388.1.S1_at   | SPLEEN TRYPSIN INHIBITOR                                                                                                                                                                                                                                                                | 0.227268476 | 1.163034794 |
| Bt.4389.1.S1_at   | PANCREATIC ANIONIC TRYPSINOGEN                                                                                                                                                                                                                                                          | -0.09914459 | 1.256508468 |
| Bt.4404.1.A1_at   | SIMILAR TO 60S RIBOSOMAL PROTEIN L35                                                                                                                                                                                                                                                    | 0.013213472 | 1.002065709 |
| Bt.4406.1.S1_at   | HYPOTHETICAL LOC506986                                                                                                                                                                                                                                                                  | 0.122517015 | 1.121706185 |
| Bt.4410.1.S1_at   | HEAT SHOCK 27KDA PROTEIN 1                                                                                                                                                                                                                                                              | 0.160521146 | 1.127011034 |
| Bt.4415.1.S1_at   | ATP6IP1 PROTEIN                                                                                                                                                                                                                                                                         | 0.171104818 | 1.150268317 |
| Bt.442.1.S1_at    | PEROXIREDOXIN 3                                                                                                                                                                                                                                                                         | -0.11900085 | 0.900713137 |
| Bt.4476.1.S1_at   | SIMILAR TO CHROMOSOME 3 OPEN READING FRAME 10                                                                                                                                                                                                                                           | 0.233739008 | 1.1193104   |
| Bt.4515.1.S1_at   | ATP SYNTHASE, H+ TRANSPORTING, MITOCHONDRIAL F1 COMPLEX, GAMMA                                                                                                                                                                                                                          | 0.099687683 | 1.05595988  |
| Bt.4540.1.S1_at   | HYPOTHETICAL PROTEIN                                                                                                                                                                                                                                                                    | 0.156554498 | 1.123448362 |
| Bt.4574.1.S1_at   | MHC CLASS II (BOLA-DQB) PRECURSOR                                                                                                                                                                                                                                                       | -0.18236435 | 0.932570134 |
| Bt.4594.1.S1_at   | SIMILAR TO KRUPPEL-LIKE FACTOR 6                                                                                                                                                                                                                                                        | -0.51421471 | 0.680447873 |
| Bt.4606.1.S1_at   | SIMILAR TO KRUPPEL-LIKE FACTOR 6                                                                                                                                                                                                                                                        | -0.35284825 | 0.769182213 |
| Bt.4606.2.S1_at   | FINKEL-BISKIS-REILLY MURINE SARCOMA VIRUS (FBR-MUSV) UBIQUITOUSLY                                                                                                                                                                                                                       | 0.031044282 | 1.018966549 |
| Bt.4618.1.S1_at   | POLY(RC) BINDING PROTEIN 1                                                                                                                                                                                                                                                              | 0.044729752 | 1.055198609 |
| Bt.4620.1.S1_at   | CALPONIN 2                                                                                                                                                                                                                                                                              | 0.10600571  | 1.064940894 |
| Bt.4635.1.S1_at   | CYTOCHROME C OXIDASE SUBUNIT VIII, HEART                                                                                                                                                                                                                                                | 0.122742028 | 1.048181781 |
| Bt.4637.1.A1_a_at | ,GB:CK953255 /DB_XREF=GI:45467635 /DB_XREF=4092864 /CLONE=10BOV31_F23<br>/TID=BT.4659.1 /CNT=59 /FEA=EST /TIER=STACK /STK=21 /UG=BT.4659<br>,GB:CK774445 /DB_XREF=GI:42728588 /DB_XREF=963207 /TID=BT.4670.1 /CNT=30<br>/FEA=EST /TIER=CONSEND /STK=5 /UG=BT.4670 /UG_TITLE=TRANSCRIBED | 0.10773232  | 0.999486268 |
| Bt.4659.1.S1_at   | MYXOVIRUS (INFLUENZA) RESISTANCE 1, (MURINE HOMOLOG)                                                                                                                                                                                                                                    | 0.20390307  | 1.146674504 |
| Bt.4670.1.S1_at   | TRANSFORMING GROWTH FACTOR, BETA 1 (CAMURATI-ENGELMANN DISEASE)                                                                                                                                                                                                                         | -0.28809669 | 0.814256073 |
| Bt.4675.1.S1_a_at | EUKARYOTIC TRANSLATION INITIATION FACTOR 3, SUBUNIT 2 BETA, 36KDA                                                                                                                                                                                                                       | 0.336994454 | 1.307414033 |
| Bt.469.1.A1_at    | SIMILAR TO 40S RIBOSOMAL PROTEIN S9                                                                                                                                                                                                                                                     | 0.180793148 | 1.12618953  |
| Bt.4694.1.S1_at   | B-CELL TRANSLOCATION GENE 1, ANTI-PROLIFERATIVE                                                                                                                                                                                                                                         | 0.031894418 | 1.005717786 |
| Bt.4711.1.S1_at   | B-CELL TRANSLOCATION GENE 1, ANTI-PROLIFERATIVE                                                                                                                                                                                                                                         | -0.16200446 | 0.873880021 |
| Bt.4725.1.S1_at   | CAPPING PROTEIN (ACTIN FILAMENT) MUSCLE Z-LINE, BETA                                                                                                                                                                                                                                    | 0.120396304 | 1.04636838  |
| Bt.4730.1.S1_at   |                                                                                                                                                                                                                                                                                         |             |             |

|                   |                                                                          |             |             |
|-------------------|--------------------------------------------------------------------------|-------------|-------------|
| Bt.4733.1.S1_at   | PHOSPHOGLYCERATE DEHYDROGENASE                                           | 0.301074475 | 1.281473535 |
| Bt.4741.1.S1_at   | SIMILAR TO SPLICING FACTOR, ARGININE/SERINE-RICH 3 (PRE-MRNA SPLICING    | -0.07974047 | 0.929370734 |
| Bt.4751.1.S1_a_at | MAJOR HISTOCOMPATIBILITY COMPLEX, CLASS II, DQ ALPHA 1                   | -0.59797553 | 0.370046194 |
| Bt.4751.2.S1_a_at | MAJOR HISTOCOMPATIBILITY COMPLEX, CLASS II, DQ ALPHA 1                   | 0.2186127   | 1.348121606 |
| Bt.4757.1.S1_at   | RHO GDP DISSOCIATION INHIBITOR (GDI) BETA                                | -0.04595668 | 0.951221209 |
| Bt.4762.1.S1_at   | MHC CLASS I HEAVY CHAIN                                                  | -0.38857674 | 0.747565362 |
| Bt.4763.1.S1_at   | ANTIGEN CD3Z, ZETA POLYPEPTIDE                                           | -0.04895216 | 1.030744091 |
| Bt.4768.1.S2_at   | JUNCTIONAL ADHESION MOLECULE 1                                           | 0.561375482 | 1.195914224 |
| Bt.4770.1.S1_at   | SIMILAR TO PROGRAMMED CELL DEATH 4 ISOFORM 1                             | -0.09023709 | 0.944948992 |
| Bt.4790.1.S1_at   | INTEGRIN LINKED KINASE                                                   | 0.573650996 | 1.414182682 |
| Bt.4795.1.S1_at   | SOLUTE CARRIER FAMILY 6 (NEUROTRANSMITTER TRANSPORTER, SEROTONIN),       | 0.69423547  | 1.378044187 |
| Bt.4823.2.S1_a_at | CAMP-REGULATED PHOSPHOPROTEIN                                            | 0.17133793  | 1.130481854 |
| Bt.4837.1.A1_at   | ALDOLASE C, FRUCTOSE-BISPHOSPHATE                                        | 0.318084844 | 1.200945177 |
| Bt.4839.1.S1_at   | PHOSPHATIDYLETHANOLAMINE BINDING PROTEIN                                 | 0.064034411 | 1.008593288 |
| Bt.4842.1.S1_at   | RIBOSOMAL PROTEIN L18                                                    | -0.02308664 | 0.974864406 |
| Bt.4843.1.S2_at   | V-AKT MURINE THYMOMA VIRAL ONCOGENE HOMOLOG 1                            | 0.144806978 | 1.071105091 |
| Bt.4873.1.S1_at   | CYTOCHROME B-5 REDUCTASE                                                 | 0.149190575 | 1.11927345  |
| Bt.4880.1.S1_at   | NRAS-RELATED GENE                                                        | 0.151680689 | 1.067432751 |
| Bt.4884.1.S1_at   | .GB:AW660357 /DB_XREF=GI:7426184 /DB_XREF=98353 /TID=BT.4884.1 /CNT=26   | 0.099252838 | 1.111268043 |
| Bt.4898.1.S1_at   | /FEA=EST /TIER=CONSEND /STK=0 /UG=BT.4884 /UG_TITLE=TRANSCRIBED          | 0.041333237 | 0.991150039 |
| Bt.4902.1.S1_at   | BRAIN ABUNDANT, MEMBRANE ATTACHED SIGNAL PROTEIN 1                       | 0.291630756 | 1.144341076 |
| Bt.4902.1.S1_at   | CTSZ PROTEIN                                                             |             |             |
| Bt.4907.2.S1_a_at | .GB:CB426719 /DB_XREF=GI:29199047 /DB_XREF=601929 /TID=BT.4907.2 /CNT=1  | 0.171079222 | 1.105806479 |
| Bt.4915.1.S1_at   | /FEA=EST /TIER=CONSEND /STK=1 /UG=BT.4907 /UG_TITLE=TRANSCRIBED          | 0.033312831 | 1.023735656 |
| Bt.4917.1.S1_at   | .GB:CK771290 /DB_XREF=GI:42725384 /DB_XREF=959545 /TID=BT.4915.1 /CNT=63 | 0.074585047 | 1.029670307 |
| Bt.4917.1.S1_at   | SIMILAR TO RAB1, MEMBER RAS ONCOGENE FAMILY                              |             |             |
| Bt.4942.1.S1_at   | .GB:CB422054 /DB_XREF=GI:29189716 /DB_XREF=595122 /TID=BT.4942.1 /CNT=79 | 0.188186535 | 1.150738519 |
| Bt.4967.1.S1_at   | /FEA=EST /TIER=STACK /STK=32 /UG=BT.4942 /UG_TITLE=TRANSCRIBED           | -0.03210655 | 0.969009139 |
| Bt.4970.1.S1_at   | SIMILAR TO 40S RIBOSOMAL PROTEIN S3A (V-FOS TRANSFORMATION EFFECTOR      | 0.138104659 | 1.10138734  |
| Bt.50.1.S1_at     | CYTOCHROME C OXIDASE SUBUNIT VIIA POLYPEPTIDE 2 (LIVER)                  | -0.27648685 | 0.789204659 |
| Bt.5019.1.S1_at   | CD8 ANTIGEN, ALPHA POLYPEPTIDE (P32)                                     | 0.279143872 | 1.173975368 |
| Bt.5021.1.S1_at   | PALMITOYL-PROTEIN THIOESTERASE 1 (CEROID-LIPOFUSCINOSIS, NEURONAL 1,     | -2.86919374 | 0.115816049 |
| Bt.5029.1.S1_at   | FIBRILLIN 1                                                              | 0.088027626 | 1.044766404 |
| Bt.5037.1.S1_at   | ATP SYNTHASE, H+ TRANSPORTING, MITOCHONDRIAL F0 COMPLEX, SUBUNIT D       | 0.172953721 | 1.137121245 |
| Bt.5051.1.S1_a_at | S100 CALCIUM-BINDING PROTEIN A10                                         | 0.030163221 | 1.027343071 |
| Bt.5052.1.S1_at   | RIBOSOMAL PROTEIN S27A                                                   | 0.105399629 | 1.076422704 |
| Bt.5052.1.S1_at   | RAN, MEMBER RAS ONCOGENE FAMILY                                          |             |             |



|                   |                                                                                                                                            |             |             |
|-------------------|--------------------------------------------------------------------------------------------------------------------------------------------|-------------|-------------|
| Bt.5054.1.S1_a_at | RIBOSOMAL PROTEIN L24                                                                                                                      | 0.04540006  | 1.014462828 |
| Bt.5070.1.S1_at   | POLYUBIQUITIN                                                                                                                              | -0.08526921 | 0.910723764 |
| Bt.5070.1.S1_x_at | POLYUBIQUITIN                                                                                                                              | -0.06039643 | 0.943496235 |
| Bt.5082.1.S1_at   | MHC CLASS I JSP.1                                                                                                                          | 0.100892462 | 1.054371631 |
| Bt.5089.1.S1_at   | H3 HISTONE, FAMILY 3A                                                                                                                      | 0.093799784 | 1.062524073 |
| Bt.5089.1.S2_at   | H3 HISTONE, FAMILY 3A                                                                                                                      | 0.09841842  | 1.102293398 |
| Bt.5089.1.S3_at   | H3 HISTONE, FAMILY 3A                                                                                                                      | 0.179161463 | 1.108707421 |
| Bt.5106.2.S1_at   | GUANINE NUCLEOTIDE BINDING PROTEIN (G PROTEIN), ALPHA STIMULATING<br>_GB:CK948858 /DB_XREF=GI:45463238 /DB_XREF=4073574 /CLONE=10BOV25_C07 | 0.059446406 | 1.040649246 |
| Bt.5112.1.A1_a_at | /TID=BT.5112.1 /CNT=42 /FEA=EST /TIER=CONSEND /STK=5 /UG=BT.5112                                                                           | 0.359120872 | 1.365087911 |
| Bt.5131.1.S1_at   | HYPOTHETICAL PROTEIN MGC3234                                                                                                               | 0.223889386 | 1.156749668 |
| Bt.5154.1.S1_at   | HEAT SHOCK 70 KD PROTEIN 2                                                                                                                 | 0.508573973 | 1.368874315 |
| Bt.5154.1.S1_s_at | HEAT SHOCK 70 KD PROTEIN 2                                                                                                                 | 0.563801624 | 1.361358243 |
| Bt.5180.1.S1_at   | UNCOUPLING PROTEIN 2 (MITOCHONDRIAL, PROTON CARRIER)                                                                                       | 0.143242499 | 1.089687916 |
| Bt.5183.1.S1_at   | TUBULIN, ALPHA 1                                                                                                                           | 0.348476973 | 1.332186753 |
| Bt.5183.2.S1_at   | TUBULIN, ALPHA 1                                                                                                                           | 0.394359044 | 1.272663366 |
| Bt.5230.1.S1_at   | INHIBITOR OF DNA BINDING 3<br>_GB:CK950574 /DB_XREF=GI:45464954 /DB_XREF=4089907 /CLONE=10BOV27_K18                                        | 0.169922245 | 1.192449925 |
| Bt.5243.1.S1_at   | /TID=BT.5243.1 /CNT=108 /FEA=EST /TIER=STACK /STK=35 /UG=BT.5243                                                                           | 0.062503284 | 1.023581284 |
| Bt.5252.1.S1_at   | SIMILAR TO PHOSPHOGLYCERATE MUTASE                                                                                                         | 0.36853465  | 1.251613571 |
| Bt.5266.1.S1_at   | _GB:CK948189 /DB_XREF=GI:45462569 /DB_XREF=4072994 /CLONE=10BOV24_C15                                                                      | 0.039728322 | 0.986799855 |
| Bt.5269.1.S1_at   | BETA-2-MICROGLOBULIN                                                                                                                       | -0.03472716 | 0.977582206 |
| Bt.5269.2.S1_a_at | BETA-2-MICROGLOBULIN                                                                                                                       | -0.02056004 | 0.981354043 |
| Bt.5269.2.S1_at   | BETA-2-MICROGLOBULIN<br>_GB:BG467202 /DB_XREF=GI:13396177 /DB_XREF=1A08E04A /TID=BT.5300.1                                                 | -0.0490169  | 0.989101583 |
| Bt.5300.1.S1_at   | /CNT=29 /FEA=EST /TIER=STACK /STK=7 /UG=BT.5300 /UG_TITLE=TRANSCRIBED                                                                      | 0.202935095 | 1.089921468 |
| Bt.5305.1.A1_at   | NUCLEAR FACTOR (ERYTHROID-DERIVED 2)-LIKE 2                                                                                                | 0.23764313  | 1.089742579 |
| Bt.5319.1.S1_at   | ANTI-OXIDANT PROTEIN 2 (NON-SELENIUM GLUTATHIONE PEROXIDASE, ACIDIC                                                                        | 0.168881483 | 1.081733591 |
| Bt.5319.2.S1_a_at | ANTI-OXIDANT PROTEIN 2 (NON-SELENIUM GLUTATHIONE PEROXIDASE, ACIDIC                                                                        | 0.201102787 | 1.106896444 |
| Bt.5324.1.S1_s_at | MHC CLASS I JSP.1                                                                                                                          | -0.06480846 | 1.011742834 |
| Bt.5334.1.S1_at   | LAMININ RECEPTOR 1 (RIBOSOMAL PROTEIN SA, 67 KDA)                                                                                          | -0.03971097 | 0.952457204 |
| Bt.5378.1.S1_at   | NADH DEHYDROGENASE 1 BETA SUBCOMPLEX 8                                                                                                     | 0.123005904 | 1.071255853 |
| Bt.5381.2.S1_x_at | CASEIN BETA                                                                                                                                | -1.36617121 | 0.799237178 |
| Bt.5388.1.S1_at   | H3 HISTONE, FAMILY 3A                                                                                                                      | 0.070894076 | 1.072580975 |
| Bt.5390.1.S1_at   | MAJOR VAULT PROTEIN                                                                                                                        | 0.328701821 | 1.230695209 |
| Bt.5399.1.S2_at   | SIMILAR TO NAD KINASE (POLY(P)/ATP NAD KINASE)                                                                                             | -0.0988346  | 0.941491196 |

|                   |                                                                                                                                        |             |             |
|-------------------|----------------------------------------------------------------------------------------------------------------------------------------|-------------|-------------|
| Bt.5406.1.S1_at   | ,GB:CK944984 /DB_XREF=GI:45459364 /DB_XREF=4069444 /CLONE=10BOV17_O05 /TID=BT.5406.1 /CNT=23 /FEA=EST /TIER=STACK /STK=6 /UG=BT.5406   | 0.171673495 | 1.147203101 |
| Bt.5434.1.S1_at   | DEFENDER AGAINST CELL DEATH 1                                                                                                          | 0.130497042 | 1.121334993 |
| Bt.5442.1.S1_at   | SIMILAR TO TRANSMEMBRANE PROTEIN 50A (SMALL MEMBRANE PROTEIN 1)                                                                        | 0.094575392 | 1.059016982 |
| Bt.5466.2.S1_a_at | RIBOSOMAL PROTEIN S4, X-LINKED                                                                                                         | -0.03867026 | 0.972043587 |
| Bt.5467.1.S1_at   | PROSAPOSIN                                                                                                                             | 0.164351152 | 1.078486115 |
| Bt.5467.1.S2_a_at | PROSAPOSIN                                                                                                                             | 0.142265621 | 1.083975922 |
| Bt.5467.1.S2_at   | PROSAPOSIN                                                                                                                             | 0.12876107  | 1.084350305 |
| Bt.5467.2.S1_a_at | PROSAPOSIN                                                                                                                             | 0.164692963 | 1.107409436 |
| Bt.5472.1.S1_at   | LECTIN, GALACTOSIDE-BINDING, SOLUBLE, 1 (GALECTIN 1)                                                                                   | 0.149761074 | 1.118922575 |
| Bt.5475.1.S1_at   | ADAPTOR-RELATED PROTEIN COMPLEX 3, DELTA 1 SUBUNIT                                                                                     | 0.09596493  | 1.070913703 |
| Bt.5483.1.S1_at   | NADH DEHYDROGENASE (UBIQUINONE) FE-S PROTEIN 8, 23KDA (NADH-                                                                           | 0.222592688 | 1.12107906  |
| Bt.5491.1.S1_at   | SIMILAR TO PRENYLATED RAB ACCEPTOR PROTEIN 1 (PRA1 FAMILY PROTEIN 1)                                                                   | 0.364207733 | 1.313092619 |
| Bt.5493.1.S1_at   | S100 CALCIUM-BINDING PROTEIN A4 (CALCIUM PROTEIN,CALVASCULIN,                                                                          | 0.126839901 | 1.091583354 |
| Bt.5510.1.S1_at   | ATP SYNTHASE, H+ TRANSPORTING, MITOCHONDRIAL F1 COMPLEX, EPSILON                                                                       | 0.075683307 | 1.066122073 |
| Bt.5519.1.S1_at   | SIMILAR TO MELANOMA ANTIGEN FAMILY D, 1 ISOFORM B                                                                                      | -0.27519918 | 0.819450875 |
| Bt.552.1.S1_at    | CHEMOKINE (C-C MOTIF) LIGAND 5                                                                                                         | -0.24944778 | 0.741487321 |
| Bt.5520.1.S1_at   | ISOCITRATE DEHYDROGENASE 2 (NADP+), MITOCHONDRIAL                                                                                      | 0.103317399 | 1.065356088 |
| Bt.5525.1.S1_at   | ,GB:CK848938 /DB_XREF=GI:45211730 /DB_XREF=971768 /TID=BT.5525.1 /CNT=47 /FEA=EST /TIER=STACK /STK=7 /UG=BT.5525 /UG_TITLE=TRANSCRIBED | 0.369730712 | 1.108558315 |
| Bt.5534.1.S1_at   | THIOREDOXIN REDUCTASE 1                                                                                                                | -0.15127536 | 0.833567811 |
| Bt.5542.1.A1_at   | SIMILAR TO NUCLEOSOME ASSEMBLY PROTEIN 1-LIKE 1 (NAP-1 RELATED                                                                         | -0.05482843 | 0.988621287 |
| Bt.5542.2.S1_at   | SIMILAR TO NUCLEOSOME ASSEMBLY PROTEIN 1-LIKE 1 (NAP-1 RELATED                                                                         | -0.05822876 | 0.978593632 |
| Bt.5571.1.S1_at   | HYPOTHETICAL PROTEIN                                                                                                                   | 0.198591722 | 1.112717192 |
| Bt.5573.1.S1_at   | CE5 PROTEIN-LIKE                                                                                                                       | 0.045656473 | 1.000184185 |
| Bt.5599.1.S1_at   | SIMILAR TO CHROMOSOME 9 OPEN READING FRAME 19                                                                                          | 0.247312432 | 1.259056369 |
| Bt.5699.1.S1_at   | SIMILAR TO COATED VESICLE MEMBRANE PROTEIN                                                                                             | 0.160545512 | 1.074558399 |
| Bt.57.1.S1_at     | NADH DEHYDROGENASE (UBIQUINONE) FE-S PROTEIN 5, 15KDA (NADH-                                                                           | 0.095694164 | 0.98270903  |
| Bt.5732.2.A1_at   | ,GB:CK848553 /DB_XREF=GI:45211027 /DB_XREF=971332 /TID=BT.5732.2 /CNT=1                                                                | -0.41630982 | 0.799765598 |
| Bt.5754.1.S1_at   | SERINE/THREONINE KINASE RECEPTOR ASSOCIATED PROTEIN                                                                                    | 0.12056613  | 0.987816993 |
| Bt.5878.1.A1_at   | SIMILAR TO SERINE DEHYDRATASE                                                                                                          | 0.034768544 | 1.049398157 |
| Bt.5878.2.S1_at   | SIMILAR TO SERINE DEHYDRATASE                                                                                                          | 0.046158365 | 1.081214122 |
| Bt.5892.1.S1_at   | ,GB:BF601967 /DB_XREF=GI:11699190 /DB_XREF=267082 /TID=BT.5892.1 /CNT=8                                                                | 0.293853938 | 1.301219922 |
| Bt.5897.1.S1_at   | SIMILAR TO UBIQUITIN D                                                                                                                 | -0.0747072  | 0.960307644 |
| Bt.5897.2.S1_at   | SIMILAR TO UBIQUITIN-LIKE PROTEIN FAT10 (DIUBIQUITIN)                                                                                  | -0.20321588 | 0.844846123 |
| Bt.6000.1.A1_at   | ,GB:BE683291 /DB_XREF=GI:10070012 /DB_XREF=182774 /TID=BT.6000.1 /CNT=8                                                                | 0.064966838 | 0.914462594 |
| Bt.6000.2.S1_at   | ,GB:CF930613 /DB_XREF=GI:38280041 /DB_XREF=CF--04-R-I19 /TID=BT.6000.2                                                                 | 0.20118562  | 1.090865395 |

|                   |                                                                                                                                          |             |             |
|-------------------|------------------------------------------------------------------------------------------------------------------------------------------|-------------|-------------|
| Bt.6015.1.S1_at   | .GB:BG690364 /DB_XREF=GI:13932165 /DB_XREF=338871 /TID=BT.6015.1 /CNT=15 /FEA=EST /TIER=CONSEND /STK=0 /UG=BT.6015 /UG_TITLE=TRANSCRIBED | -1.62274917 | 0.745516122 |
| Bt.6082.1.S1_at   | .GB:BF773728 /DB_XREF=GI:12121619 /DB_XREF=283190 /TID=BT.6082.1 /CNT=18                                                                 | 0.439798009 | 1.340984356 |
| Bt.6091.1.S1_at   | GLYCERALDEHYDE-3-PHOSPHATE DEHYDROGENASE                                                                                                 | 0.076853148 | 1.06978505  |
| Bt.6111.1.S1_at   | SIMILAR TO CG9324-PA                                                                                                                     | 0.108868413 | 1.041211346 |
| Bt.6126.1.S1_at   | TRANSPORTER 2, ABC(ATP BINDING CASSETTE)                                                                                                 | 0.102839535 | 1.103082079 |
| Bt.6130.1.S1_at   | SIMILAR TO RIBOPHORIN II PRECURSOR                                                                                                       | -0.1261142  | 0.977910455 |
| Bt.615.1.S1_at    | HYPOTHETICAL GENE SUPPORTED BY NM_012329                                                                                                 | 0.251937649 | 1.078809012 |
| Bt.6151.1.S1_at   | .GB:CB446844 /DB_XREF=GI:29253226 /DB_XREF=700581 /TID=BT.6151.1 /CNT=31 /FEA=EST /TIER=STACK /STK=7 /UG=BT.6151 /UG_TITLE=TRANSCRIBED   | 0.241300562 | 1.127032838 |
| Bt.6176.1.S1_at   | .GB:BE236381 /DB_XREF=GI:9021099 /DB_XREF=144153 /TID=BT.6176.1 /CNT=4                                                                   | -0.0576753  | 0.958535986 |
| Bt.6230.1.S1_at   | .GB:CK831725 /DB_XREF=GI:45058042 /DB_XREF=4055451 /CLONE=8BOV_25H05 /TID=BT.6230.1 /CNT=8 /FEA=EST /TIER=CONSEND /STK=0 /UG=BT.6230     | 0.192171946 | 1.105614456 |
| Bt.6239.1.S1_at   | .GB:BE756758 /DB_XREF=GI:10170750 /DB_XREF=210995 /TID=BT.6239.1 /CNT=5 /FEA=EST /TIER=CONSEND /STK=0 /UG=BT.6239 /UG_TITLE=TRANSCRIBED  | 0.272711553 | 1.070820567 |
| Bt.630.1.S1_at    | CD81 ANTIGEN (TARGET OF ANTIPROLIFERATIVE ANTIBODY 1)                                                                                    | 0.114550206 | 1.059091712 |
| Bt.632.1.S1_at    | TISSUE INHIBITOR OF METALLOPROTEINASE 1 (ERYTHROID POTENTIATING                                                                          | 0.253415193 | 1.225858297 |
| Bt.6334.1.A1_at   | SIMILAR TO DEGENERATIVE SPERMATOCYTE HOMOLOG 1, LIPID DESATURASE                                                                         | 0.124506043 | 1.053526364 |
| Bt.6360.1.S1_at   | .GB:CK951391 /DB_XREF=GI:45465771 /DB_XREF=4090520 /CLONE=10BOV28_E07 /TID=BT.6360.1 /CNT=17 /FEA=EST /TIER=CONSEND /STK=2 /UG=BT.6360   | 0.124783706 | 1.083966799 |
| Bt.641.1.S1_at    | SIMILAR TO PROTEASOME SUBUNIT ALPHA TYPE 2 (PROTEASOME COMPONENT                                                                         | 0.101484499 | 1.047104277 |
| Bt.643.1.S1_at    | .GB:CB465019 /DB_XREF=GI:29271404 /DB_XREF=726276 /TID=BT.643.1 /CNT=23 /FEA=EST /TIER=STACK /STK=10 /UG=BT.643 /UG_TITLE=TRANSCRIBED    | -0.05900668 | 0.969532188 |
| Bt.6434.2.S1_at   | SIMILAR TO RING FINGER PROTEIN 149                                                                                                       | -0.57232491 | 0.908260048 |
| Bt.6442.1.S1_at   | TROPOMYOSIN 1 (ALPHA)                                                                                                                    | 0.413365596 | 1.572813296 |
| Bt.6460.1.S1_at   | CHEMOKINE RECEPTOR 7 ???                                                                                                                 | 0.152483997 | 1.074073018 |
| Bt.647.1.S1_at    | MYOTROPHIN                                                                                                                               | -0.25037517 | 0.780916553 |
| Bt.648.1.A1_at    | .GB:CK944329 /DB_XREF=GI:45458709 /DB_XREF=4068628 /CLONE=10BOV16_M05 /TID=BT.648.1 /CNT=9 /FEA=EST /TIER=CONSEND /STK=0 /UG=BT.648      | -0.09041977 | 0.947857005 |
| Bt.6494.1.S1_at   | MITOCHONDRIAL NADH:UBIQUINONE OXIDOREDUCTASE ESSS SUBUNIT                                                                                | 0.214118102 | 1.129979188 |
| Bt.6496.1.S1_at   | HEPATITIS B VIRUS X INTERACTING PROTEIN                                                                                                  | 0.238582282 | 1.18608845  |
| Bt.65.1.S1_at     | NADH DEHYDROGENASE (UBIQUINONE) 1 ALPHA SUBCOMPLEX, 2, 8KDA                                                                              | 0.157610301 | 1.083184851 |
| Bt.662.1.S1_at    | X-BOX BINDING PROTEIN 1                                                                                                                  | 0.122160885 | 1.088125652 |
| Bt.6665.1.S1_at   | .GB:BE665432 /DB_XREF=GI:10026001 /DB_XREF=154465 /TID=BT.6665.1 /CNT=4                                                                  | -0.19369986 | 0.895281965 |
| Bt.6679.1.S1_at   | SIMILAR TO NUCLEAR AUTOANTIGENIC SPERM PROTEIN (NASP)                                                                                    | -0.37793252 | 0.874204606 |
| Bt.6680.1.S1_a_at | SIMILAR TO FK506-BINDING PROTEIN 2 PRECURSOR (PEPTIDYL-PROLYL CIS-                                                                       | 0.263983218 | 1.214858332 |
| Bt.6700.1.A1_at   | SIMILAR TO TISSUE FACTOR PATHWAY INHIBITOR PRECURSOR (TFPI)                                                                              | 0.961061114 | 1.875446724 |

|                   |                                                                                                                                                                                                                  |             |             |
|-------------------|------------------------------------------------------------------------------------------------------------------------------------------------------------------------------------------------------------------|-------------|-------------|
| Bt.6705.1.S1_at   | .GB:CK957222 /DB_XREF=GI:45471602 /DB_XREF=4097633 /CLONE=10BOV3_M16 /TID=BT.6705.1 /CNT=16 /FEA=EST /TIER=CONSEND /STK=1 /UG=BT.6705                                                                            | 0.277636964 | 1.21370104  |
| Bt.6714.1.S1_a_at | UBIQUITIN-LIKE 5                                                                                                                                                                                                 | 0.148170376 | 1.099973891 |
| Bt.6714.3.S1_a_at | UBIQUITIN-LIKE 5                                                                                                                                                                                                 | 0.115248141 | 1.106092833 |
| Bt.6718.1.S1_at   | SIMILAR TO GLYCOGEN PHOSPHORYLASE, BRAIN FORM                                                                                                                                                                    | 0.316666907 | 1.235353114 |
| Bt.676.1.S1_at    | SIMILAR TO H2A HISTONE FAMILY, MEMBER V ISOFORM 1                                                                                                                                                                | 0.066816628 | 1.037936814 |
| Bt.6775.1.S1_at   | SIMILAR TO ANNEXIN A3 (ANNEXIN III) (LIPOCORTIN III) (PLACENTAL .GB:BF440184 /DB_XREF=GI:11500067 /DB_XREF=BS29000203303 /CLONE=BS29000203303 /TID=BT.6784.1 /CNT=1 /FEA=EST /TIER=CONSEND /STK=1                | 0.454286344 | 1.391754913 |
| Bt.6784.1.A1_at   | TUMOR NECROSIS FACTOR RECEPTOR SUPERFAMILY, MEMBER 1B                                                                                                                                                            | -0.10136895 | 0.921532757 |
| Bt.6817.1.S1_at   | PROTEASOME ALPHA 3 SUBUNIT ISOFORM 1                                                                                                                                                                             | 0.098551429 | 1.020390768 |
| Bt.6827.1.S1_at   | SIMILAR TO FK506 BINDING PROTEIN 11 PRECURSOR (PEPTIDYL-PROLYL CIS-.GB:CK770170 /DB_XREF=GI:42724264 /DB_XREF=958308 /TID=BT.685.1 /CNT=13 /FEA=EST /TIER=STACK /STK=7 /UG=BT.685 /UG_TITLE=TRANSCRIBED SEQUENCE | 0.144048006 | 1.122000899 |
| Bt.6840.1.S1_a_at | .GB:BF707172 /DB_XREF=GI:11998833 /DB_XREF=282688 /TID=BT.6969.1 /CNT=5                                                                                                                                          | 0.157563261 | 1.089754115 |
| Bt.685.1.A1_at    | NADH DEHYDROGENASE (UBIQUINONE) 1 BETA SUBCOMPLEX, 10, 22KDA                                                                                                                                                     | 0.287381455 | 1.208846875 |
| Bt.6969.1.S1_at   | .GB:CK849489 /DB_XREF=GI:45212776 /DB_XREF=972468 /TID=BT.7011.1 /CNT=39 /FEA=EST /TIER=STACK /STK=8 /UG=BT.7011 /UG_TITLE=TRANSCRIBED                                                                           | -0.3716434  | 0.848071665 |
| Bt.70.1.S1_at     | SIMILAR TO INTERLEUKIN-32 PRECURSOR (IL-32) (NATURAL KILLER CELLS                                                                                                                                                | 0.106955787 | 1.079505301 |
| Bt.7011.1.S1_at   | SIMILAR TO THYROID HORMONE RECEPTOR INTERACTOR 3                                                                                                                                                                 | 0.132265124 | 1.08624134  |
| Bt.7013.1.S1_at   | SIMILAR TO PROTEASOME SUBUNIT BETA TYPE 1 (PROTEASOME COMPONENT C5) (MACROPAIN SUBUNIT C5) (MULTICATALYTIC ENDOPEPTIDASE COMPLEX                                                                                 | -0.18007123 | 0.919398906 |
| Bt.7032.1.S1_at   | RIBOSOMAL PROTEIN L5                                                                                                                                                                                             | 0.440946098 | 1.135217463 |
| Bt.7040.1.S1_at   | HEMOGLOBIN, BETA [BETA GLOBIN]                                                                                                                                                                                   | 0.164441786 | 1.113282881 |
| Bt.7052.1.S1_at   | HEMOGLOBIN, GAMMA                                                                                                                                                                                                | -0.02454134 | 0.970048589 |
| Bt.7056.1.S1_at   | .GB:BF651608 /DB_XREF=GI:11916738 /DB_XREF=274433 /TID=BT.7066.1 /CNT=4 /FEA=EST /TIER=CONSEND /STK=0 /UG=BT.7066 /UG_TITLE=TRANSCRIBED                                                                          | 0.228041469 | 1.242924442 |
| Bt.7056.2.A1_x_at | CHROMOSOME 20 OPEN READING FRAME 36                                                                                                                                                                              | 0.345898917 | 1.31860136  |
| Bt.7066.1.S1_at   | .GB:BE754146 /DB_XREF=GI:10168138 /DB_XREF=207570 /TID=BT.7074.1 /CNT=5                                                                                                                                          | 0.203809223 | 1.178407511 |
| Bt.7069.1.S1_at   | .GB:CK974977 /DB_XREF=GI:45492951 /DB_XREF=4106057 /CLONE=9BOV32_L16 /TID=BT.7078.1 /CNT=85 /FEA=EST /TIER=STACK /STK=7 /UG=BT.7078                                                                              | -0.22278087 | 0.795968892 |
| Bt.7074.1.A1_at   | .GB:CK848993 /DB_XREF=GI:45211833 /DB_XREF=971829 /TID=BT.7078.1 /CNT=85 /FEA=EST /TIER=STACK /STK=24 /UG=BT.7078 /UG_TITLE=TRANSCRIBED                                                                          | 0.068520793 | 1.017340785 |
| Bt.7078.1.S1_at   | SIMILAR TO DUAL SPECIFICITY MITOGEN-ACTIVATED PROTEIN KINASE KINASE 1                                                                                                                                            | 0.419422887 | 1.489495876 |
| Bt.7078.1.S2_at   | SIMILAR TO MITOCHONDRIAL IMPORT RECEPTOR SUBUNIT TOM22 HOMOLOG                                                                                                                                                   | 0.340080846 | 1.382639333 |
| Bt.7105.1.S1_at   | ORNITHINE DECARBOXYLASE                                                                                                                                                                                          | -0.1361459  | 0.912603042 |
| Bt.712.1.S2_at    |                                                                                                                                                                                                                  | 0.306477912 | 1.213976446 |
| Bt.7133.1.S1_at   |                                                                                                                                                                                                                  | 0.236408956 | 1.068979697 |

|                 |                                                                                                                                                                                                                   |             |             |
|-----------------|-------------------------------------------------------------------------------------------------------------------------------------------------------------------------------------------------------------------|-------------|-------------|
| Bt.7170.1.S1_at | .GB:CK947788 /DB_XREF=GI:45462168 /DB_XREF=4072942 /CLONE=10BOV23_P23 /TID=BT.7170.1 /CNT=6 /FEA=EST /TIER=CONSEND /STK=0 /UG=BT.7170                                                                             | -0.365549   | 0.77494983  |
| Bt.7181.1.S1_at | CALPAIN, SMALL SUBUNIT 1                                                                                                                                                                                          | 0.295848018 | 1.202509802 |
| Bt.7187.1.S1_at | SIMILAR TO 40S RIBOSOMAL PROTEIN S7 (S8)                                                                                                                                                                          | 0.043326469 | 1.032291111 |
| Bt.7193.1.S1_at | CYTOCHROME C OXIDASE SUBUNIT VIA POLYPEPTIDE 1                                                                                                                                                                    | 0.201362085 | 1.110513221 |
| Bt.7194.1.S1_at | ATP SYNTHASE, H+ TRANSPORTING, MITOCHONDRIAL F1 COMPLEX, ALPHA                                                                                                                                                    | 0.066336872 | 1.015342557 |
| Bt.7204.1.S1_at | FC FRAGMENT OF IGG, LOW AFFINITY IIIA, RECEPTOR FOR (CD16)                                                                                                                                                        | 0.367934914 | 1.15726408  |
| Bt.7206.1.S1_at | GABA(A) RECEPTOR-ASSOCIATED PROTEIN-LIKE 2                                                                                                                                                                        | 0.234733427 | 1.173202328 |
| Bt.7225.1.S1_at | TYROSINE 3-MONOOXYGENASE/TRYPOTPHAN 5-MONOOXYGENASE ACTIVATION                                                                                                                                                    | 0.216924462 | 1.179478424 |
| Bt.7236.1.S1_at | PHOSPHOINOSITIDE-3-KINASE, REGULATORY SUBUNIT, POLYPEPTIDE 1 (P85<br>.GB:NM_174098.2 /DB_XREF=GI:31342853 /GEN=LAP3 /TID=BT.7240.1 /CNT=35                                                                        | -0.24296719 | 0.817786707 |
| Bt.7240.1.S1_at | /FEA=FLMRNA /TIER=FL+STACK /STK=10 /LL=281271 /UG=BT.7240 /DEF=BOS                                                                                                                                                | 0.281389586 | 1.220047241 |
| Bt.7283.1.S1_at | TRANSALDOLASE 1                                                                                                                                                                                                   | 0.174852853 | 1.174352103 |
| Bt.7288.1.S1_at | SIMILAR TO TRANSLOCON-ASSOCIATED PROTEIN, DELTA SUBUNIT PRECURSOR                                                                                                                                                 | 0.112833209 | 1.03934887  |
| Bt.7358.1.S1_at | .GB:CB170173 /DB_XREF=GI:28156301 /DB_XREF=YIR603162953.R1 /TID=BT.7358.1                                                                                                                                         | 0.145167321 | 1.098975533 |
| Bt.7403.1.S1_at | NUCLEOLIN                                                                                                                                                                                                         | 0.043172367 | 1.034384467 |
| Bt.7416.1.S1_at | .GB:BF074071 /DB_XREF=GI:10867582 /DB_XREF=221398 /TID=BT.7416.1 /CNT=12                                                                                                                                          | -0.09384893 | 0.955544673 |
| Bt.7440.1.S1_at | /FEA=EST /TIER=CONSEND /STK=0 /UG=BT.7416 /UG_TITLE=TRANSCRIBED                                                                                                                                                   | -0.20648533 | 1.017014351 |
| Bt.7452.1.S1_at | SIMILAR TO PROLINE SYNTHETASE CO-TRANSCRIBED BACTERIAL HOMOLOG                                                                                                                                                    | 0.02413715  | 1.006082691 |
| Bt.7459.1.S1_at | SIMILAR TO EUKARYOTIC TRANSLATION INITIATION FACTOR 1 (EIF1) (PROTEIN                                                                                                                                             | -0.09357571 | 0.951233099 |
| Bt.746.1.S1_at  | SIMILAR TO V-ETS ERYTHROBLASTOSIS VIRUS E26 ONCOGENE HOMOLOG 1                                                                                                                                                    | 0.11474191  | 1.114242164 |
| Bt.7467.1.S1_at | PROTEOLIPID PROTEIN 2 (COLONIC EPITHELIUM-ENRICHED)                                                                                                                                                               | -0.07785002 | 0.981639858 |
| Bt.7468.1.S1_at | .GB:BF601482 /DB_XREF=GI:11698704 /DB_XREF=266471 /TID=BT.7467.1 /CNT=5                                                                                                                                           | -0.14923618 | 0.978906404 |
| Bt.7471.1.S1_at | .GB:BE753844 /DB_XREF=GI:10167836 /DB_XREF=207024 /TID=BT.7468.1 /CNT=23                                                                                                                                          | 0.245370677 | 1.182171251 |
| Bt.75.1.S1_at   | SIMILAR TO H2A HISTONE FAMILY, MEMBER J ISOFORM 2                                                                                                                                                                 | 0.096985611 | 1.042824515 |
| Bt.7505.1.S1_at | CYTOCHROME C OXIDASE SUBUNIT VIB                                                                                                                                                                                  | -0.08396185 | 0.883876242 |
| Bt.7542.1.S1_at | .GB:BF775951 /DB_XREF=GI:12123851 /DB_XREF=286242 /TID=BT.7505.1 /CNT=21                                                                                                                                          | 0.194703375 | 1.109007412 |
| Bt.7552.1.S1_at | SIMILAR TO BCL-2-RELATED PROTEIN A1 (BFL-1 PROTEIN) (HEMOPOIETIC-                                                                                                                                                 | 0.212901612 | 1.13484259  |
| Bt.7588.1.A1_at | SIMILAR TO ADAPTOR-RELATED PROTEIN COMPLEX 2, MU 1 SUBUNIT ISOFORM B                                                                                                                                              | 0.037434166 | 1.002504445 |
| Bt.7594.1.S1_at | .GB:CK848334 /DB_XREF=GI:45210613 /DB_XREF=971083 /TID=BT.7588.1 /CNT=11                                                                                                                                          | 0.066586823 | 1.036706947 |
| Bt.7631.1.S1_at | SIMILAR TO DIAMINE ACETYLTRANSFERASE 1 (SPERMIDINE/SPERMINE N(1)-<br>ACETYLTRANSFERASE 1) (SSAT) (SSAT-1) (PUTRESCINE ACETYLTRANSFERASE)                                                                          | -0.65740976 | 0.837211173 |
| Bt.7655.1.S1_at | .GB:CK846923 /DB_XREF=GI:45207914 /DB_XREF=969486 /TID=BT.7631.1 /CNT=33                                                                                                                                          | -0.16124023 | 0.862151674 |
| Bt.7670.1.A1_at | /FEA=EST /TIER=STACK /STK=8 /UG=BT.7631 /UG_TITLE=TRANSCRIBED<br>.GB:CB169061 /DB_XREF=GI:28155187 /DB_XREF=IMU602702714.R1 /TID=BT.7655.1 /CNT=56 /FEA=EST /TIER=STACK /STK=11 /UG=BT.7655 /UG_TITLE=TRANSCRIBED | 0.333293931 | 1.372952566 |
|                 | .GB:CK769300 /DB_XREF=GI:42723394 /DB_XREF=956861 /TID=BT.7670.1 /CNT=5                                                                                                                                           |             |             |

|                   |                                                                          |             |             |
|-------------------|--------------------------------------------------------------------------|-------------|-------------|
| Bt.7676.2.S1_a_at | CALRETICULIN                                                             | 0.129581287 | 1.098824238 |
| Bt.77.1.S1_at     | CYTOCHROME C OXIDASE SUBUNIT VIIC                                        | 0.117672207 | 1.066423073 |
| Bt.7770.1.S1_at   | CYCLIN G1                                                                | 0.114303695 | 1.077398785 |
| Bt.7776.1.S1_at   | TUMOR PROTEIN, TRANSLATIONALLY-CONTROLLED 1                              | -0.04129236 | 0.985755102 |
| Bt.7776.1.S1_s_at | TUMOR PROTEIN, TRANSLATIONALLY-CONTROLLED 1                              | -0.07249399 | 0.95062282  |
| Bt.7776.2.S1_s_at | TUMOR PROTEIN, TRANSLATIONALLY-CONTROLLED 1                              | -0.04121307 | 0.960547471 |
| Bt.7783.1.S1_a_at | IGM HEAVY CHAIN CONSTANT REGION                                          | 0.060437705 | 1.024979943 |
| Bt.7798.1.S1_at   | SIMILAR TO DYNEIN, CYTOPLASMIC, LIGHT CHAIN 2A                           | 0.156998845 | 1.100237148 |
| Bt.7804.1.S1_at   | GLYCOGENIN                                                               | 0.187566327 | 1.030671732 |
| Bt.7814.1.S1_at   | SIMILAR TO ADP-RIBOSYLATION FACTOR 4                                     | 0.140048916 | 1.113692056 |
| Bt.7870.1.S1_at   | PYROPHOSPHATASE (INORGANIC)                                              | 0.162780556 | 1.09702312  |
| Bt.7910.1.S1_a_at | ,GB:BE684349 /DB_XREF=GI:10071973 /DB_XREF=184725 /TID=BT.7910.1 /CNT=6  | 0.939971104 | 2.271710265 |
| Bt.7912.1.A1_at   | ,GB:CB448807 /DB_XREF=GI:29255189 /DB_XREF=702968 /TID=BT.7912.1 /CNT=2  | -0.14324337 | 0.881359013 |
| Bt.7916.1.S1_at   | SIMILAR TO DOLICHYL-DIPHOSPHOOLIGOSACCHARIDE--PROTEIN                    | 0.095373558 | 0.983367258 |
| Bt.7917.1.S1_at   | ,GB:CK948090 /DB_XREF=GI:45462470 /DB_XREF=4073080 /CLONE=10BOV24_H09    | -0.19345265 | 0.861074001 |
| Bt.7929.1.S1_at   | HYPOTHETICAL PROTEIN                                                     | 0.140862783 | 1.104403492 |
| Bt.7931.1.S1_at   | SIMILAR TO T-CELL SURFACE GLYCOPROTEIN E2 PRECURSOR (E2 ANTIGEN)         | 0.102418733 | 1.123652832 |
| Bt.7938.1.S1_at   | CATHEPSIN S                                                              | 0.084676805 | 1.035389327 |
| Bt.7968.1.S1_at   | SIMILAR TO PROTEIN PHOSPHATASE 1, REGULATORY (INHIBITOR) SUBUNIT 2       | 0.232727292 | 1.256246577 |
| Bt.8015.1.S1_a_at | RIBOSOMAL PROTEIN S24                                                    | -0.03280522 | 0.976176108 |
| Bt.8022.1.S1_at   | CATHEPSIN C                                                              | 0.210752476 | 1.133110792 |
| Bt.8077.1.S1_at   | PHOSPHOGLYCERATE KINASE 1                                                | 0.15796295  | 1.121448878 |
| Bt.8081.1.S1_a_at | HYPOTHETICAL LOC514954                                                   | -0.04300839 | 0.966494271 |
| Bt.8121.1.S1_x_at | MHC CLASS 1 PRECURSOR                                                    | 0.056969389 | 1.021953866 |
| Bt.8122.1.S1_at   | THYMOSIN BETA 4, X CHROMOSOME                                            | -0.0158351  | 0.998157683 |
| Bt.8125.1.S1_a_at | RIBOSOMAL PROTEIN, LARGE, P1                                             | -0.03421135 | 0.965068318 |
| Bt.8125.2.S1_x_at | RIBOSOMAL PROTEIN, LARGE, P1                                             | -0.01719965 | 0.981466634 |
| Bt.8140.1.S1_at   | FC FRAGMENT OF IGE, HIGH AFFINITY I, RECEPTOR FOR; GAMMA POLYPEPTIDE     | 0.374305384 | 1.322451532 |
| Bt.8191.1.S1_at   | SOLUTE CARRIER FAMILY 9 (SODIUM/HYDROGEN EXCHANGER), ISOFORM 3           | 0.176398697 | 1.222749927 |
| Bt.8212.1.S1_at   | ,GB:CK972315 /DB_XREF=GI:45490289 /DB_XREF=4102918 /CLONE=9BOV24_I21     | 0.116029522 | 1.07859039  |
| Bt.8254.1.S1_at   | ACTIN RELATED PROTEIN 2/3 COMPLEX, SUBUNIT 5, 16KDA                      | -0.06049473 | 0.95395773  |
| Bt.8258.1.S1_at   | ,GB:CK949665 /DB_XREF=GI:45464045 /DB_XREF=4075040 /CLONE=10BOV26_P09    | -0.16351261 | 0.886118936 |
| Bt.8258.2.S1_at   | ,GB:BE236703 /DB_XREF=GI:9021421 /DB_XREF=145484 /TID=BT.8258.2 /CNT=8   | -0.10633314 | 0.906554433 |
| Bt.8265.1.A1_at   | ,GB:BM286733 /DB_XREF=GI:17995759 /DB_XREF=526920 /TID=BT.8265.1 /CNT=6  | 0.328139969 | 1.100248239 |
| Bt.8331.1.S1_at   | ,GB:CK772747 /DB_XREF=GI:42726890 /DB_XREF=961320 /TID=BT.8331.1 /CNT=17 | 0.392468988 | 1.22100515  |
| Bt.8343.1.S1_at   | HYPOTHETICAL PROTEIN                                                     | 0.208767035 | 1.130059032 |
| Bt.837.1.S1_at    | UP-REGULATED DURING VASCULAR CALCIFICATION                               | 0.137038785 | 1.083654165 |

|                   |                                                                                                                                                |             |             |
|-------------------|------------------------------------------------------------------------------------------------------------------------------------------------|-------------|-------------|
| Bt.8382.2.S1_at   | SIMILAR TO RHOB GENE                                                                                                                           | -0.28104804 | 0.761023167 |
| Bt.8482.1.A1_at   | MITOGEN-ACTIVATED PROTEIN KINASE 1                                                                                                             | 0.165010133 | 1.068813611 |
| Bt.8504.1.A1_at   | SIMILAR TO FRAGILE X MENTAL RETARDATION 1<br>_GB:BF440420 /DB_XREF=GI:11500303 /DB_XREF=BS29000103503                                          | -0.13064134 | 0.947904796 |
| Bt.8505.1.A1_at   | /CLONE=BS29000103503 /TID=BT.8505.1 /CNT=2 /FEA=EST /TIER=CONSEND /STK=1                                                                       | -0.37807759 | 0.791627986 |
| Bt.8544.1.S1_at   | CD69 ANTIGEN (P60, EARLY T-CELL ACTIVATION ANTIGEN)                                                                                            | -0.50762047 | 0.700818207 |
| Bt.8552.1.S1_at   | MAJOR HISTOCOMPATIBILITY COMPLEX, CLASS II, DR ALPHA                                                                                           | -0.05738642 | 0.91944629  |
| Bt.8586.1.S1_at   | SIMILAR TO MYELOID-ASSOCIATED DIFFERENTIATION MARKER                                                                                           | -0.835889   | 0.320341226 |
| Bt.868.1.S1_a_at  | SIMILAR TO LATE ENDOSOMAL/LYSOSOMAL MP1 INTERACTING PROTEIN (P14)                                                                              | 0.240011829 | 1.155147901 |
| Bt.8686.1.S1_at   | TUMOR REJECTION ANTIGEN (GP96) 1                                                                                                               | 0.248878547 | 1.16016099  |
| Bt.8787.1.S1_at   | ADIPONECTIN RECEPTOR-1                                                                                                                         | 0.208024585 | 1.089559862 |
| Bt.8820.1.S1_a_at | HEMATOPOIETIC CELL-SPECIFIC LYN SUBSTRATE 1<br>_GB:CK775459 /DB_XREF=GI:42731709 /DB_XREF=966585 /TID=BT.8875.2 /CNT=215                       | -0.11771051 | 0.951680198 |
| Bt.8875.2.S1_at   | /FEA=EST /TIER=STACK /STK=38 /UG=BT.8875 /UG_TITLE=IMMUNOGLOBULIN                                                                              | 0.500167223 | 1.58086334  |
| Bt.888.1.S1_at    | BCL2/ADENOVIRUS E1B 19KDA INTERACTING PROTEIN 3-LIKE                                                                                           | 0.265396317 | 1.212216101 |
| Bt.893.1.S1_at    | NADH DEHYDROGENASE (UBIQUINONE) 1 BETA SUBCOMPLEX, 6, 17KDA                                                                                    | 0.159325868 | 1.083758897 |
| Bt.8939.1.S1_at   | TYRO PROTEIN TYROSINE KINASE BINDING PROTEIN                                                                                                   | 0.210572668 | 1.146607745 |
| Bt.8945.1.S1_at   | TOLL-LIKE RECEPTOR 2                                                                                                                           | 0.249722354 | 1.043201615 |
| Bt.8947.1.S1_at   | LEGUMAIN                                                                                                                                       | 0.297427393 | 1.18345019  |
| Bt.8950.1.S1_at   | CELL DEATH-REGULATORY PROTEIN GRIM19                                                                                                           | 0.127361864 | 1.088164971 |
| Bt.8957.1.S1_at   | CHEMOKINE (C-X-C MOTIF) RECEPTOR 4                                                                                                             | -0.84845166 | 0.570273627 |
| Bt.9020.1.S2_at   | BLADDER CANCER ASSOCIATED PROTEIN                                                                                                              | 0.147026371 | 1.070723761 |
| Bt.9027.1.S1_at   | NUCLEAR FACTOR OF KAPPA LIGHT POLYPEPTIDE GENE ENHANCER IN B-CELLS<br>_GB:CK770241 /DB_XREF=GI:42724335 /DB_XREF=958387 /TID=BT.9041.1 /CNT=22 | -0.39783732 | 0.813999566 |
| Bt.9041.1.S1_at   | /FEA=EST /TIER=CONSEND /STK=5 /UG=BT.9041 /UG_TITLE=TRANSCRIBED                                                                                | -0.16939057 | 0.885730003 |
| Bt.9042.1.A1_at   | SIMILAR TO EUKARYOTIC TRANSLATION INITIATION FACTOR 5 (EIF-5)                                                                                  | 0.125908175 | 1.080988264 |
| Bt.9047.1.S1_at   | TUBULIN, ALPHA 1<br>_GB:CK849770 /DB_XREF=GI:45213304 /DB_XREF=972897 /TID=BT.9064.1 /CNT=22                                                   | 0.268090987 | 1.186443162 |
| Bt.9064.1.S1_at   | /FEA=EST /TIER=STACK /STK=6 /UG=BT.9064 /UG_TITLE=TRANSCRIBED                                                                                  | 0.081242801 | 0.986898991 |
| Bt.9136.1.S1_at   | SIMILAR TO ALPHA-1,6-MANNOSYL-GLYCOPROTEIN 2-BETA-N-<br>ACETYLGALUCOSAMINYLTRANSFERASE (MANNOSE)                                               | 0.13051577  | 1.04270221  |
| Bt.9164.1.A1_at   | SIMILAR TO STAM BINDING PROTEIN                                                                                                                | -0.56961958 | 0.842673116 |
| Bt.9193.1.S1_at   | _GB:BM251639 /DB_XREF=GI:17887231 /DB_XREF=BOTL0100011_E09                                                                                     | -0.10996763 | 0.915371891 |
| Bt.9202.1.S1_at   | SIMILAR TO FIBROLEUKIN PRECURSOR (FIBRINOGEN-LIKE PROTEIN 2) (PT49)                                                                            | 0.463541107 | 1.373774334 |
| Bt.9208.1.S1_at   | TRIGGERING RECEPTOR EXPRESSED ON MYELOID CELLS-1                                                                                               | 0.475413209 | 1.52356409  |
| Bt.9225.1.A1_at   | SIMILAR TO HEXOKINASE TYPE III (HK III)                                                                                                        | 0.467514021 | 1.382369995 |

|                   |                                                                                                                                                                                                     |             |             |
|-------------------|-----------------------------------------------------------------------------------------------------------------------------------------------------------------------------------------------------|-------------|-------------|
| Bt.9267.1.A1_at   | .GB:CB531127 /DB_XREF=GI:29393510 /DB_XREF=742377 /TID=BT.9267.1 /CNT=11                                                                                                                            | 0.720380032 | 1.677132408 |
| Bt.9269.1.S1_at   | /FEA=EST /TIER=STACK /STK=10 /UG=BT.9267 /UG_TITLE=TRANSCRIBED                                                                                                                                      | 0.168732049 | 1.060070277 |
| Bt.927.1.S1_at    | SIMILAR TO RIBOSOME ASSOCIATED MEMBRANE PROTEIN 4                                                                                                                                                   | 0.105213393 | 1.077184993 |
| Bt.9278.1.S1_at   | ADP-RIBOSYLATION FACTOR 1                                                                                                                                                                           | -0.20230553 | 0.845633259 |
| Bt.9296.1.A1_at   | .GB:CK977712 /DB_XREF=GI:45495686 /DB_XREF=4109060 /CLONE=9BOV37_I19                                                                                                                                | 0.159056402 | 1.12561965  |
| Bt.9360.1.S1_at   | SIMILAR TO INTERFERON-INDUCED GUANYLATE-BINDING PROTEIN 1 (GTP-SIMILAR TO CALGRANULIN A (MIGRATION INHIBITORY FACTOR-RELATED PROTEIN 8) (MRP-8) (CYSTIC FIBROSIS ANTIGEN) (CFAG) (P8) (LEUKOCYTE L1 | 0.155393325 | 1.112083737 |
| Bt.9363.1.A1_at   | .GB:BM251259 /DB_XREF=GI:17886851 /DB_XREF=BOTL0100004XB09R /TID=BT.9363.1 /CNT=6 /FEA=EST /TIER=CONSEND /STK=4 /UG=BT.9363                                                                         | -0.3458248  | 0.615873485 |
| Bt.9363.2.S1_at   | .GB:CK945488 /DB_XREF=GI:45459868 /DB_XREF=4069677 /CLONE=10BOV17_H22 /TID=BT.9363.2 /CNT=23 /FEA=EST /TIER=CONSEND /STK=0 /UG=BT.9363                                                              | -0.44128087 | 0.60015939  |
| Bt.9385.1.S1_at   | SIMILAR TO BETA-TUBULIN COFACTOR C                                                                                                                                                                  | 0.353774075 | 1.436373619 |
| Bt.9405.1.S1_at   | SIMILAR TO TAF10 RNA POLYMERASE II, TATA BOX BINDING PROTEIN (TBP)-                                                                                                                                 | 0.115875848 | 1.095867626 |
| Bt.9428.1.S1_at   | HYPOTHETICAL PROTEIN                                                                                                                                                                                | 0.693664616 | 1.735573992 |
| Bt.9541.1.S1_at   | SIMILAR TO CELLULAR NUCLEIC ACID BINDING PROTEIN 1                                                                                                                                                  | 0.066794684 | 1.026635365 |
| Bt.9546.2.S1_a_at | .GB:BM363646 /DB_XREF=GI:18107015 /DB_XREF=BS320057B10E08 /CLONE=BS320057B10E08 /TID=BT.9546.2 /CNT=5 /FEA=EST /TIER=CONSEND                                                                        | -0.12663351 | 0.955902247 |
| Bt.9548.1.S1_at   | HYPOTHETICAL PROTEIN                                                                                                                                                                                | -0.02385796 | 0.97174665  |
| Bt.9549.1.S1_at   | HOMEODOMAIN ONLY PROTEIN                                                                                                                                                                            | -0.1238346  | 0.951858855 |
| Bt.9559.1.S1_at   | SOLUTE CARRIER FAMILY 25 MEMBER 5                                                                                                                                                                   | 0.195052162 | 1.205933825 |
| Bt.9570.1.S1_at   | .GB:CK847032 /DB_XREF=GI:45208132 /DB_XREF=969613 /TID=BT.9570.1 /CNT=12                                                                                                                            | 0.659853318 | 1.878326126 |
| Bt.9578.1.S2_at   | PROTEIN PHOSPHATASE 1, CATALYTIC SUBUNIT, GAMMA ISOFORM                                                                                                                                             | -0.06236514 | 0.930633083 |
| Bt.9588.1.S1_at   | SIMILAR TO 60S RIBOSOMAL PROTEIN L7A                                                                                                                                                                | 0.053033278 | 1.022212201 |
| Bt.9589.1.S1_at   | .GB:CK775656 /DB_XREF=GI:42731906 /DB_XREF=966789 /TID=BT.9589.1 /CNT=27 /FEA=EST /TIER=STACK /STK=9 /UG=BT.9589 /UG_TITLE=TRANSCRIBED                                                              | 0.265971905 | 1.211098227 |
| Bt.959.1.S1_at    | FILAMIN A, ALPHA (ACTIN BINDING PROTEIN 280)                                                                                                                                                        | 0.13674965  | 1.094806644 |
| Bt.9591.2.S1_at   | .GB:CB222709 /DB_XREF=GI:28293223 /DB_XREF=1IL31A08 /TID=BT.9591.2 /CNT=2                                                                                                                           | -0.28869452 | 0.867324641 |
| Bt.9594.1.S1_at   | .GB:BE685133 /DB_XREF=GI:10072757 /DB_XREF=187240 /TID=BT.9594.1 /CNT=9                                                                                                                             | -0.72230435 | 1.202289054 |
| Bt.9629.2.S1_at   | SIMILAR TO CG40127-PA.3                                                                                                                                                                             | 0.101877394 | 1.101308748 |
| Bt.9662.1.S1_at   | PROSTAGLANDIN E RECEPTOR 4 (SUBTYPE EP4)                                                                                                                                                            | -0.35811195 | 0.718362149 |
| Bt.9667.1.A1_at   | .GB:CK960385 /DB_XREF=GI:45474765 /DB_XREF=4101526 /CLONE=10BOV8_O21                                                                                                                                | -0.14021214 | 0.922041771 |
| Bt.9676.1.S1_a_at | SIMILAR TO CG17059-PA                                                                                                                                                                               | 0.288993944 | 1.244240522 |
| Bt.9698.1.S1_at   | MITOGEN-ACTIVATED PROTEIN KINASE 14                                                                                                                                                                 | 0.261054855 | 1.289988086 |
| Bt.9706.2.S1_at   | SIMILAR TO RAB5-INTERACTING PROTEIN ISOFORM A                                                                                                                                                       | 0.224794898 | 1.180100331 |
| Bt.9725.1.A1_at   | .GB:CK848549 /DB_XREF=GI:45211019 /DB_XREF=971328 /TID=BT.9725.1 /CNT=10 /FEA=EST /TIER=STACK /STK=7 /UG=BT.9725 /UG_TITLE=TRANSCRIBED                                                              | 0.099867083 | 1.022698516 |



|                      |                                                                                                                                           |             |             |
|----------------------|-------------------------------------------------------------------------------------------------------------------------------------------|-------------|-------------|
| Bt.9728.1.S1_at      | ATPASE, NA+/K+ TRANSPORTING, BETA 3 POLYPEPTIDE                                                                                           | 0.158951962 | 1.123089072 |
| Bt.9737.1.S1_at      | SIMILAR TO LYMPHOCYTE ANTIGEN 6 COMPLEX LOCUS G6C PROTEIN                                                                                 | -0.17641765 | 1.099424913 |
| Bt.9767.1.S1_a_at    | .GB:CK949309 /DB_XREF=GI:45463689 /DB_XREF=4074569 /CLONE=10BOV26_L18<br>/TID=BT.9767.1 /CNT=12 /FEA=EST /TIER=CONSEND /STK=3 /UG=BT.9767 | 0.312032466 | 1.324450742 |
| Bt.9774.1.S1_a_at    | .GB:CK977109 /DB_XREF=GI:45495083 /DB_XREF=4108336 /CLONE=9BOV35_K15<br>/TID=BT.9774.1 /CNT=14 /FEA=EST /TIER=CONSEND /STK=3 /UG=BT.9774  | 0.271627047 | 1.240318041 |
| Bt.981.1.S1_at       | CHLORIDE INTRACELLULAR CHANNEL 4                                                                                                          | 0.281760628 | 1.105875682 |
| Bt.9814.1.S1_at      | RIBOSOMAL PROTEIN L36A                                                                                                                    | 0.063911778 | 1.00509553  |
| Bt.9826.1.S1_at      | COX5A PROTEIN                                                                                                                             | 0.139893342 | 1.071797398 |
| Bt.983.1.S1_at       | HYPOXANTHINE-GUANINE PHOSPHORIBOSYLTRANSFERASE                                                                                            | 0.288641472 | 1.197802062 |
| Bt.9945.1.S1_at      | SIMILAR TO GRG PROTEIN (ESP1 PROTEIN) (AMINO ENHANCER OF SPLIT) (R-                                                                       | 0.079856484 | 1.047306811 |
| Bt.9947.1.S1_at      | .GB:CB459802 /DB_XREF=GI:29266186 /DB_XREF=719606 /TID=BT.9947.1 /CNT=32                                                                  | -0.14397952 | 0.914086668 |
| Bt.9956.1.S1_at      | PUTATIVE 42-9-9 PROTEIN                                                                                                                   | 0.414827962 | 1.316680444 |
| BtAffx.1.13.S1_at    | TACHYKININ 3, NEUROKININ BETA                                                                                                             | -0.28929525 | 0.830041749 |
| BtAffx.1.20.S1_at    | REGULATOR OF G-PROTEIN SIGNALING 20                                                                                                       | 0.91016286  | 1.731295976 |
| BtAffx.29967.1.S1_at | .GI:45433264 /TID=BTAFFX.29967.1 /CNT=1 /FEA=MRNA /TIER=CONSEND /STK=0                                                                    | -0.01656796 | 0.992679005 |
| BtAffx.29968.1.S1_at | .GI:5823437 /TID=BTAFFX.29968.1 /CNT=1 /FEA=MRNA /TIER=CONSEND /STK=0                                                                     | 0.988434476 | 2.244508077 |
