# Supplementary material
Source: PubMed Central journal article supplement (PMC2646461)
Supplement: 90276.2008_5.pdf [file 90276.2008_5.pdf]

Supplemental table 4. Differentially expressed genes in heifers of the PI group compared to the control heifers, day 190 of gestation.

| Affymetrix Identifier | Gene Identifier | Gene Name                                                                                                                                                                                                                      | Ratio | Direction |
|-----------------------|-----------------|--------------------------------------------------------------------------------------------------------------------------------------------------------------------------------------------------------------------------------|-------|-----------|
| Bt.552.1.S1_at        | NM_175827       | chemokine (C-C motif) ligand 5                                                                                                                                                                                                 | 2.82  | Down      |
| Bt.21883.1.S1_at      | CB425639        | Transcribed locus, weakly similar to NP_631937.1 placenta-specific 8 [Mus musculus]                                                                                                                                            | 2.69  | Down      |
| Bt.12986.1.S1_at      | CK977019        | MAD2 mitotic arrest deficient-like 1 (yeast)                                                                                                                                                                                   | 2.42  | Up        |
| Bt.9974.1.S1_at       | NM_174511       | Chemokine (C-C motif) ligand 3-like 1                                                                                                                                                                                          | 2.24  | Down      |
| Bt.19690.1.A1_at      | CB534503        | Transcribed locus, weakly similar to XP_519213.1 paraoxonase 2 [Pan troglodytes]                                                                                                                                               | 2.22  | Down      |
| Bt.12959.1.S1_at      | CA923353        | Unique Bos taurus cDNA clone 5BOV_6G5 3'                                                                                                                                                                                       | 2.16  | Up        |
| Bt.9363.2.S1_at       | CK945488        | Transcribed locus, moderately similar to NP_001326.2 cathepsin W (lymphopain) [Homo sapiens]                                                                                                                                   | 2.07  | Down      |
| Bt.19462.1.A1_at      | CB461397        | Transcribed sequence                                                                                                                                                                                                           | 2.03  | Down      |
| Bt.9363.1.A1_at       | BM251259        | Transcribed locus, moderately similar to NP_001326.2 cathepsin W (lymphopain) [Homo sapiens]                                                                                                                                   | 2.01  | Down      |
| Bt.19339.3.A1_at      | CB461169        | Transcribed sequences                                                                                                                                                                                                          | 1.96  | Up        |
| Bt.26636.1.S1_at      | CK775256        | Transcribed locus, moderately similar to NP_077215.2 natural killer cell group 7 sequence [Mus musculus]                                                                                                                       | 1.96  | Down      |
| Bt.20798.1.S1_at      | CB445920        | Transcribed sequences                                                                                                                                                                                                          | 1.94  | Up        |
| Bt.9504.1.A1_at       | CB463807        | Transcribed sequence with moderate similarity to protein sp:P10159 (H.sapiens) IF5A_HUMAN Initiation factor 5A                                                                                                                 | 1.91  | Down      |
| Bt.5546.1.S1_at       | NM_174324       | adenylate cyclase-inhibiting G alpha protein                                                                                                                                                                                   | 1.86  | Up        |
| Bt.16141.1.S1_at      | CK778261        | Transcribed locus, strongly similar to XP_519864.1 similar to cyclin E2 isoform 1; G1/S-specific cyclin E2 [Pan troglodytes]                                                                                                   | 1.85  | Up        |
| Bt.21975.1.S1_at      | CK771825        | Perforin 1 (pore forming protein)                                                                                                                                                                                              | 1.77  | Down      |
| Bt.4266.2.A1_at       | BF042221        | Transcribed locus                                                                                                                                                                                                              | 1.75  | Up        |
| Bt.6000.2.S1_at       | CF930613        | Transcribed locus                                                                                                                                                                                                              | 1.73  | Down      |
| Bt.2173.1.S1_at       | CB463330        | Transcribed locus, strongly similar to XP_214478.2 similar to Succinate semialdehyde dehydrogenase (NAD(+)-dependent succinic semialdehyde dehydrogenase) [Rattus norvegicus]                                                  | 1.72  | Up        |
| Bt.11909.1.A1_at      | CB171451        | Transcribed locus, moderately similar to NP_001938.1 dual specificity phosphatase 7 [Homo sapiens]                                                                                                                             | 1.71  | Down      |
| Bt.25101.1.S1_at      | CF763999        | Transcribed sequences                                                                                                                                                                                                          | 1.7   | Down      |
| Bt.18776.1.S1_at      | CK979795        | Transcribed locus, strongly similar to NP_055551.1 KIAA0101 [Homo sapiens]                                                                                                                                                     | 1.7   | Up        |
| Bt.24218.1.S1_at      | CK960396        | Transcribed locus, strongly similar to XP_523625.1 similar to CDC6 homolog; CDC18 (cell division cycle 18, S.pombe, homolog)-like; CDC6-related protein; CDC6 (cell division cycle 6, S. cerevisiae) homolog [Pan troglodytes] | 1.69  | Up        |
| Bt.17915.1.S1_at      | CK957227        | Transcribed locus, strongly similar to XP_526535.1 similar to chromosome condensation protein G [Pan troglodytes]                                                                                                              | 1.68  | Up        |
| Bt.27531.1.A1_at      | CK846626        | Transcribed sequences                                                                                                                                                                                                          | 1.68  | Up        |
| Bt.20277.1.S1_at      | CB443446        | Transcribed locus, strongly similar to XP_346407.1 topoisomerase (DNA) 2 alpha [Rattus norvegicus]                                                                                                                             | 1.67  | Up        |
| Bt.19247.1.S1_at      | CK837929        | Transcribed locus, moderately similar to NP_006579.2 sulfotransferase family, cytosolic, 1C, member 2 [Homo sapiens]                                                                                                           | 1.66  | Up        |
| Bt.16114.1.S1_at      | CB447702        | Transcribed locus                                                                                                                                                                                                              | 1.64  | Up        |
| Bt.11587.3.A1_a_at    | CK774460        | Transcribed locus, strongly similar to NP_006452.2 sperm associated antigen 5 [Homo sapiens]                                                                                                                                   | 1.61  | Up        |
| Bt.2111.1.S1_a_at     | CK847647        | Transcribed locus, strongly similar to NP_004144.2 origin recognition complex, subunit 1-like (yeast) [Homo sapiens]                                                                                                           | 1.61  | Up        |
| Bt.2112.1.S1_at       | BI682736        | Transcribed locus                                                                                                                                                                                                              | 1.59  | Up        |
| Bt.27759.2.S1_at      | CK962640        | Transcribed locus, moderately similar to NP_002155.1 indoleamine-pyrrole 2,3 dioxygenase [Homo sapiens]                                                                                                                        | 1.59  | Down      |
| Bt.29462.1.S1_at      | CK972892        | Transcribed locus, weakly similar to NP_689775.2 cell division cycle associated 2 [Homo sapiens]                                                                                                                               | 1.59  | Up        |
| Bt.21513.1.A1_at      | CK846625        | Transcribed locus, moderately similar to NP_004327.1 BUB1 budding uninhibited by benzimidazoles 1 homolog (yeast) [Homo sapiens]                                                                                               | 1.58  | Up        |
| Bt.22055.1.S1_at      | CB535138        | Transcribed locus                                                                                                                                                                                                              | 1.58  | Up        |
| Bt.24630.2.S1_at      | BE723387        | Transcribed locus, strongly similar to NP_653311.1 septin 10 [Homo sapiens]                                                                                                                                                    | 1.57  | Down      |
| Bt.28366.1.A1_at      | CK979039        | Transcribed locus, strongly similar to NP_060568.3 epithelial cell transforming sequence 2 oncogene [Homo sapiens]                                                                                                             | 1.57  | Up        |
| Bt.15733.1.A1_at      | CK971667        | Transcribed locus, moderately similar to XP_524698.1 similar to TAL1 (SCL) interrupting locus; SCL interrupting locus; TAL1 (SCL) interrupting locus [Pan troglodytes]                                                         | 1.56  | Up        |
| Bt.24844.1.S1_at      | CB443429        | Transcribed locus, moderately similar to NP_001804.1 centromere protein E, 312kDa [Homo sapiens]                                                                                                                               | 1.56  | Up        |
| Bt.25412.1.A1_at      | BE723538        | Transcribed locus, moderately similar to NP_060924.4 nucleolar and spindle associated protein 1 [Homo sapiens]                                                                                                                 | 1.55  | Up        |
| Bt.24288.1.A1_at      | CK778639        | Transcribed locus, moderately similar to NP_079133.3 hypothetical protein FLJ12735 [Homo sapiens]                                                                                                                              | 1.54  | Up        |
| Bt.2353.1.S1_at       | CK772080        | Transcribed locus, strongly similar to NP_001159.1 baculoviral IAP repeat-containing 5 (survivin) [Homo sapiens]                                                                                                               | 1.54  | Up        |
| Bt.13954.1.S1_at      | CB167572        | Transcribed locus, moderately similar to XP_519489.1 similar to more than blood homolog [Pan troglodytes]                                                                                                                      | 1.53  | Up        |
| Bt.13476.1.S1_at      | CK950633        | Transcribed locus, strongly similar to NP_612655.1 kinesin family member 23 [Homo sapiens]                                                                                                                                     | 1.52  | Up        |
| Bt.22461.2.A1_at      | CB441743        | Transcribed locus                                                                                                                                                                                                              | 1.51  | Up        |
| Bt.18111.1.A1_at      | CB437799        | Transcribed locus, weakly similar to XP_341569.1 similar to ORF4 [Rattus norvegicus]                                                                                                                                           | 1.51  | Up        |
| Bt.21084.1.S1_at      | BI774157        | Transcribed locus                                                                                                                                                                                                              | 1.51  | Up        |
| Bt.22699.2.A1_at      | BP103971        | Transcribed locus, strongly similar to NP_005586.1 nuclear factor I/A [Homo sapiens]                                                                                                                                           | 1.5   | Up        |
| Bt.28797.1.A1_at      | CK952083        | Transcribed locus, strongly similar to NP_082407.1 RIKEN cDNA 2610510J17 gene [Mus musculus]                                                                                                                                   | 1.5   | Up        |
| Bt.8633.1.A1_at       | BI535494        | Transcribed sequences                                                                                                                                                                                                          | 1.5   | Up        |
