# Supplementary material
Source: PubMed Central journal article supplement (PMC2646461)
Supplement: 90276.2008_6.pdf [file 90276.2008_6.pdf]

**Supplemental table 5. Differentially expressed genes in heifers of the TI group compared with the control heifers, day 190 of gestation.**

| Affymetrix Identifier | Gene Identifier | Gene Name                                                                                                                                                                                        | Ratio  | Direction |
|-----------------------|-----------------|--------------------------------------------------------------------------------------------------------------------------------------------------------------------------------------------------|--------|-----------|
| Bt.22867.2.A1_at      | CB444277        | MHC class II DQA1                                                                                                                                                                                | 487.07 | Down      |
| Bt.27760.1.S1_at      | AB008573        | MHC class I heavy chain, partial cds, clone P5647.6m                                                                                                                                             | 11.06  | Down      |
| Bt.20891.1.S1_at      | CK960499        | 2-5-oligoadenylate synthetase 1 (OAS1)                                                                                                                                                           | 7.55   | Up        |
| Bt.3125.1.S1_at       | CB464371        | Transcribed locus, strongly similar to NP_849200.1 tubulin tyrosine ligase-like 1 [Mus musculus]                                                                                                 | 5.03   | Up        |
| Bt.17477.1.A1_at      | CB433789        | Transcribed locus                                                                                                                                                                                | 3.89   | Down      |
| Bt.12304.1.S1_at      | NM_174366       | interferon-stimulated protein, 15 kDa                                                                                                                                                            | 3.57   | Up        |
| Bt.17729.1.A1_at      | CB433489        | Transcribed sequence with weak similarity to protein pir:S48218 (H.sapiens) S48218 microtubular aggregate protein - human                                                                        | 2.91   | Up        |
| Bt.19620.1.A1_at      | CK955157        | Transcribed locus, moderately similar to XP_513514.1 similar to Interferon-induced protein 44 (Antigen p44) (Non-A non-B hepatitis-associated microtubular aggregates protein) [Pan troglodytes] | 2.89   | Up        |
| Bt.20785.2.S1_at      | CB460780        | Transcribed locus, moderately similar to XP_513514.1 similar to Interferon-induced protein 44 (Antigen p44) (Non-A non-B hepatitis-associated microtubular aggregates protein) [Pan troglodytes] | 2.88   | Up        |
| Bt.24467.1.S1_at      | CB530781        | Transcribed locus                                                                                                                                                                                | 2.86   | Up        |
| Bt.8143.1.S1_at       | NM_173941       | myxovirus (influenza virus) resistance 2 (mouse)                                                                                                                                                 | 2.63   | Up        |
| Bt.20785.1.A1_at      | CK777675        | Transcribed locus, moderately similar to XP_513514.1 similar to Interferon-induced protein 44 (Antigen p44) (Non-A non-B hepatitis-associated microtubular aggregates protein) [Pan troglodytes] | 2.61   | Up        |
| Bt.12825.1.S1_at      | AV609250        | Transcribed sequence with strong similarity to protein pir:A40261 (H.sapiens) A40261 actin gamma, enteric smooth muscle - human                                                                  | 2.36   | Down      |
| Bt.3230.1.A1_at       | CK776354        | Transcribed locus, strongly similar to NP_000023.1 aminolevulinic acid, delta-, synthase 2 (sideroblastic/hypochromic anemia) [Homo sapiens]                                                     | 2.34   | Down      |
| Bt.5847.1.S1_at       | BE752683        | Transcribed sequence                                                                                                                                                                             | 2.17   | Down      |
| Bt.24033.1.A1_at      | CB432365        | Transcribed locus, moderately similar to XP_520524.1 similar to DEAD/H (Asp-Glu-Ala-Asp/His) box polypeptide RIG-I; RNA helicase; DEAD/H (Asp-Glu-Ala-Asp/His) box polypeptide [Pan troglodytes] | 2.15   | Up        |
| Bt.29447.1.A1_at      | CK972404        | Transcribed locus                                                                                                                                                                                | 2.13   | Down      |
| Bt.20798.1.S1_at      | CB445920        | Transcribed sequences                                                                                                                                                                            | 2.07   | Up        |
| Bt.23161.2.A1_at      | CB423642        | Heat shock 70 kD protein 2                                                                                                                                                                       | 2.04   | Down      |
| Bt.22029.1.S1_at      | CK980927        | Transcribed locus, moderately similar to XP_228897.2 similar to Gene trap ROSA 26 antisense, Philippe Soriano [Rattus norvegicus]                                                                | 2.03   | Up        |
| Bt.16752.1.A1_at      | CB536841        | Transcribed locus, strongly similar to NP_742051.1 thioredoxin domain containing 9 [Mus musculus]                                                                                                | 2      | Up        |
| Bt.4609.1.S1_at       | CB430069        | Transcribed locus                                                                                                                                                                                | 2      | Down      |
| Bt.23667.2.S1_at      | BE487674        | Transcribed locus, strongly similar to NP_780325.1 purinergic receptor (family A group 5) [Mus musculus]                                                                                         | 1.98   | Down      |
| Bt.12206.1.S1_x_at    | AF016394        | neutrophil beta-defensin-9 like peptide                                                                                                                                                          | 1.96   | Up        |
| Bt.25111.1.A1_at      | CK848208        | Transcribed locus, weakly similar to XP_524747.1 similar to histocompatibility 28 [Pan troglodytes]                                                                                              | 1.95   | Up        |
| Bt.22130.1.S1_at      | CK848475        | Transcribed locus, strongly similar to XP_521554.1 interferon-induced protein with tetratricopeptide repeats 5 [Pan troglodytes]                                                                 | 1.94   | Up        |
| Bt.19690.1.A1_at      | CB534503        | Transcribed locus, weakly similar to XP_519213.1 paraoxonase 2 [Pan troglodytes]                                                                                                                 | 1.93   | Down      |
| Bt.26155.1.A1_at      | CK775223        | Transcribed locus, strongly similar to NP_110396.1 N-acetylneuraminic acid pyruvate lyase (dihydrodipicolinate synthase) [Homo sapiens]                                                          | 1.92   | Down      |
| Bt.7537.1.S1_at       | BE666861        | Transcribed locus                                                                                                                                                                                | 1.92   | Up        |
| Bt.19295.1.S1_at      | CK847570        | Transcribed locus                                                                                                                                                                                | 1.9    | Down      |
| Bt.5341.1.S1_at       | M37974          | osteoglycin (osteoinductive factor, mimecan)                                                                                                                                                     | 1.88   | Down      |
| Bt.11259.1.S1_at      | CB456756        | Transcribed locus, moderately similar to NP_663424.1 RIKEN cDNA 1810023F06 gene [Mus musculus]                                                                                                   | 1.88   | Down      |
| Bt.8997.1.S1_at       | BM031140        | Transcribed sequence                                                                                                                                                                             | 1.87   | Up        |
| Bt.17558.1.A1_at      | CB430886        | Transcribed locus                                                                                                                                                                                | 1.87   | Up        |
| Bt.552.1.S1_at        | NM_175827       | chemokine (C-C motif) ligand 5                                                                                                                                                                   | 1.87   | Down      |
| Bt.6700.1.A1_at       | BP107527        | Embryonic ectoderm development protein                                                                                                                                                           | 1.86   | Down      |
| Bt.28744.1.S1_at      | CK971030        | Transcribed locus, weakly similar to XP_223172.2 similar to hypothetical protein E430029F06 [Rattus norvegicus]                                                                                  | 1.82   | Up        |
| Bt.9363.2.S1_at       | CK945488        | Transcribed locus, moderately similar to NP_001326.2 cathepsin W (lymphopain) [Homo sapiens]                                                                                                     | 1.81   | Down      |
| Bt.24855.1.S1_at      | CK776302        | Transcribed locus                                                                                                                                                                                | 1.8    | Up        |
| Bt.23597.1.S1_at      | CK848830        | Transcribed locus, weakly similar to NP_002263.1 keratin 4 [Homo sapiens]                                                                                                                        | 1.79   | Up        |
| Bt.21044.1.A1_at      | CB467996        | Transcribed locus, strongly similar to NP_001059.2 topoisomerase (DNA) II beta 180kDa [Homo sapiens]                                                                                             | 1.79   | Down      |
| Bt.3681.1.S1_at       | CK777062        | Transcribed locus, strongly similar to NP_002420.1 matrix metalloproteinase 19 [Homo sapiens]                                                                                                    | 1.78   | Up        |
| Bt.24813.2.S1_at      | BI680405        | Transcribed locus, weakly similar to NP_071430.1 28kD interferon responsive protein [Homo sapiens]                                                                                               | 1.74   | Up        |
| Bt.19462.1.A1_at      | CB461397        | Transcribed sequence                                                                                                                                                                             | 1.72   | Down      |
| Bt.6858.1.S1_at       | CK773609        | Transcribed locus, strongly similar to XP_232315.2 similar to CG4853 gene product [Rattus norvegicus]                                                                                            | 1.71   | Down      |
| Bt.22466.1.A1_at      | CB536836        | Transcribed sequences                                                                                                                                                                            | 1.71   | Up        |
| Bt.4209.1.S1_a_at     | CB534327        | Component 3                                                                                                                                                                                      | 1.71   | Down      |
| Bt.3485.1.S1_at       | BE668756        | Transcribed locus, moderately similar to NP_060520.2 MANS domain containing 1 [Homo sapiens]                                                                                                     | 1.69   | Up        |
| Bt.27394.1.A1_at      | CK846542        | Transcribed locus, strongly similar to XP_048070.4 zinc finger protein 292 [Homo sapiens]                                                                                                        | 1.69   | Down      |
| Bt.5548.1.S1_at       | NM_174601       | solute carrier family 1 (neutral amino acid transporter), member 5                                                                                                                               | 1.68   | Up        |

|                    |           |                                                                                                                                                                               |      |      |
|--------------------|-----------|-------------------------------------------------------------------------------------------------------------------------------------------------------------------------------|------|------|
| Bt.15703.2.S1_at   | CB417623  | Transcribed locus, strongly similar to NP_005793.2 topoisomerase I binding, arginine/serine-rich [Homo sapiens]                                                               | 1.66 | Down |
| Bt.19826.1.A1_at   | CB535112  | Transcribed sequence                                                                                                                                                          | 1.66 | Up   |
| Bt.24855.2.S1_at   | BE753440  | Transcribed sequence with moderate similarity to protein sp:Q9Y275 (H.sapiens) T13B_HUMAN Tumor necrosis factor ligand superfamily member 13B                                 | 1.65 | Up   |
| Bt.9385.1.S1_at    | CK953227  | Transcribed locus, moderately similar to XP_518477.1 similar to beta-tubulin cofactor C [Pan troglodytes]                                                                     | 1.65 | Down |
| Bt.22301.1.S1_at   | CK845887  | Transcribed locus, strongly similar to NP_065683.1 ATPase, H+ transporting, lysosomal V0 subunit a isoform 4 [Homo sapiens]                                                   | 1.65 | Down |
| Bt.20248.1.S1_at   | CK774420  | Transcribed locus, strongly similar to XP_356099.1 ribonuclease H2, large subunit [Mus musculus]                                                                              | 1.65 | Up   |
| Bt.21182.1.S1_at   | CB465021  | Transcribed locus                                                                                                                                                             | 1.64 | Up   |
| Bt.28732.1.S1_at   | D90419    | T-cell receptor delta chain                                                                                                                                                   | 1.64 | Down |
| Bt.17542.1.S1_at   | CB431455  | Transcribed locus                                                                                                                                                             | 1.62 | Down |
| Bt.16372.1.A1_at   | CB419791  | Transcribed locus, strongly similar to NP_076281.1 pantothenate kinase 1 [Mus musculus]                                                                                       | 1.61 | Down |
| Bt.24959.1.A1_at   | CK776907  | Transcribed locus                                                                                                                                                             | 1.61 | Up   |
| Bt.15788.3.S1_at   | CB422521  | Transcribed locus, weakly similar to NP_004326.1 bone marrow stromal cell antigen 2 [Homo sapiens]                                                                            | 1.61 | Up   |
| Bt.2173.1.S1_at    | CB463330  | Transcribed locus, strongly similar to XP_214478.2 similar to Succinate semialdehyde dehydrogenase (NAD(+)-dependent succinic semialdehyde dehydrogenase) [Rattus norvegicus] | 1.6  | Up   |
| Bt.16137.1.S1_at   | CK838029  | Transcribed locus, strongly similar to NP_000687.2 aldehyde dehydrogenase 9 family, member A1 [Homo sapiens]                                                                  | 1.6  | Down |
| Bt.27564.1.A1_at   | CK846935  | Transcribed locus, moderately similar to NP_077024.1 likely ortholog of mouse D11lgp2 [Homo sapiens]                                                                          | 1.6  | Up   |
| Bt.16122.1.S1_at   | CK968996  | Transcribed locus, strongly similar to NP_003095.1 sorbitol dehydrogenase [Homo sapiens]                                                                                      | 1.6  | Up   |
| Bt.25828.1.A1_at   | CK774101  | Transcribed locus, moderately similar to XP_520399.1 similar to centrosomal protein 1; centriole associated protein; centriolin [Pan troglodytes]                             | 1.6  | Up   |
| Bt.27889.1.S1_at   | CK846165  | Transcribed locus                                                                                                                                                             | 1.6  | Down |
| Bt.22647.2.S1_at   | BM087443  | Transcribed locus, moderately similar to XP_519171.1 similar to putative homeodomain transcription factor 2 [Pan troglodytes]                                                 | 1.6  | Up   |
| Bt.21765.1.S1_at   | CB435377  | Transcribed locus, strongly similar to NP_067067.1 Ras-related GTP binding D [Homo sapiens]                                                                                   | 1.59 | Down |
| Bt.9267.1.A1_at    | CB531127  | Transcribed locus, weakly similar to XP_235485.2 similar to CEM15; cDNA sequence BC003314 [Rattus norvegicus]                                                                 | 1.58 | Down |
| Bt.2610.1.S1_at    | NM_174081 | molybdenum cofactor sulfuryase                                                                                                                                                | 1.58 | Up   |
| Bt.21431.2.S1_at   | CB428714  | Transcribed locus, moderately similar to NP_002332.1 lymphotoxin beta (TNF superfamily, member 3) [Homo sapiens]                                                              | 1.58 | Down |
| Bt.13641.1.S1_at   | CK966877  | Transcribed locus, strongly similar to XP_510092.1 similar to glutathione transferase zeta 1 [Pan troglodytes]                                                                | 1.58 | Down |
| Bt.1345.1.S1_at    | AW426236  | Transcribed locus                                                                                                                                                             | 1.57 | Up   |
| Bt.15958.2.A1_a_at | CB460964  | ATP-binding cassette transporter subfamily B, member 1 (ABCB1)                                                                                                                | 1.57 | Down |
| Bt.20601.1.A1_at   | CB172358  | Transcribed locus, strongly similar to NP_004808.2 tight junction protein 2 (zona occludens 2) [Homo sapiens]                                                                 | 1.57 | Up   |
| Bt.20958.2.S1_at   | CB434065  | Transcribed locus, strongly similar to XP_516173.1 LOC460038 [Pan troglodytes]                                                                                                | 1.56 | Down |
| Bt.2372.1.S1_at    | CB168658  | Transcribed locus                                                                                                                                                             | 1.56 | Up   |
| Bt.20901.1.A1_at   | CB441353  | Transcribed locus, weakly similar to NP_004891.3 apolipoprotein B mRNA editing enzyme, catalytic polypeptide-like 3B [Homo sapiens]                                           | 1.56 | Up   |
| Bt.24601.1.S1_at   | CK769183  | Transcribed locus                                                                                                                                                             | 1.55 | Up   |
| Bt.23985.1.A1_at   | BP103941  | Transcribed locus, weakly similar to XP_521146.1 similar to ATRX [Pan troglodytes]                                                                                            | 1.54 | Down |
| Bt.27818.1.S1_at   | CK849477  | Transcribed locus, moderately similar to NP_037407.3 ankyrin repeat domain 11 [Homo sapiens]                                                                                  | 1.54 | Down |
| Bt.25329.1.S1_at   | CK966858  | Transcribed locus                                                                                                                                                             | 1.54 | Up   |
| Bt.4943.3.S1_a_at  | CK770915  | Transcribed locus, moderately similar to XP_218427.2 similar to poliovirus receptor homolog [Rattus norvegicus]                                                               | 1.53 | Up   |
| Bt.8144.1.S1_at    | NM_175716 | chemokine (C motif) ligand 1                                                                                                                                                  | 1.53 | Down |
| Bt.22165.1.S1_at   | AW478035  | Transcribed locus                                                                                                                                                             | 1.52 | Down |
| Bt.13981.2.A1_a_at | CB464450  | Transcribed locus                                                                                                                                                             | 1.52 | Up   |
| Bt.29387.1.S1_at   | CK969631  | Transcribed locus, weakly similar to XP_496435.1 similar to FLJ46489 protein [Homo sapiens]                                                                                   | 1.51 | Up   |
