# Supplementary material
Source: PubMed Central journal article supplement (PMC2646461)
Supplement: 90276.2008_7.pdf [file 90276.2008_7.pdf]

Supplemental table 6. Differentially expressed genes in heifers of the PI group compared to the TI group, day 190 of gestation.

| Affymetrix Identifier | Gene Identifier | Gene Name                                                                                                                                                                                        | Ratio | Direction |
|-----------------------|-----------------|--------------------------------------------------------------------------------------------------------------------------------------------------------------------------------------------------|-------|-----------|
| Bt.27760.1.S1_at      | AB008573        | MHC class I heavy chain, partial cds, clone P5647.6m                                                                                                                                             | 9.95  | Up        |
| Bt.20891.1.S1_at      | CK960499        | 2-5-oligoadenylate synthetase 1 (OAS1)                                                                                                                                                           | 3.87  | Down      |
| Bt.17477.1.A1_at      | CB433789        | Transcribed locus                                                                                                                                                                                | 3.82  | Up        |
| Bt.26711.2.S1_at      | AW658483        | Transcribed locus                                                                                                                                                                                | 2.36  | Down      |
| Bt.12304.1.S1_at      | NM_174366       | interferon-stimulated protein, 15 kDa                                                                                                                                                            | 2.33  | Down      |
| Bt.26711.1.S1_at      | CK771750        | Transcribed locus                                                                                                                                                                                | 2.29  | Down      |
| Bt.13203.1.S1_at      | CB530181        | Transcribed locus                                                                                                                                                                                | 2.25  | Up        |
| Bt.19620.1.A1_at      | CK955157        | Transcribed locus, moderately similar to XP_513514.1 similar to Interferon-induced protein 44 (Antigen p44) (Non-A non-B hepatitis-associated microtubular aggregates protein) [Pan troglodytes] | 2.24  | Down      |
| Bt.20785.2.S1_at      | CB460780        | Transcribed locus, moderately similar to XP_513514.1 similar to Interferon-induced protein 44 (Antigen p44) (Non-A non-B hepatitis-associated microtubular aggregates protein) [Pan troglodytes] | 2.17  | Down      |
| Bt.20785.1.A1_at      | CK777675        | Transcribed locus, moderately similar to XP_513514.1 similar to Interferon-induced protein 44 (Antigen p44) (Non-A non-B hepatitis-associated microtubular aggregates protein) [Pan troglodytes] | 2.13  | Down      |
| Bt.5341.1.S1_at       | M37974          | osteolectin (osteoinductive factor, mimecan)                                                                                                                                                     | 2.13  | Up        |
| Bt.19339.3.A1_at      | CB461169        | Transcribed sequences                                                                                                                                                                            | 2.05  | Up        |
| Bt.16425.1.A1_at      | CB420023        | Transcribed sequence                                                                                                                                                                             | 2.05  | Up        |
| Bt.17729.1.A1_at      | CB433489        | Transcribed sequence with weak similarity to protein pir:S48218 (H.sapiens) S48218 microtubular aggregate protein - human                                                                        | 1.94  | Down      |
| Bt.15958.2.A1_a_at    | CB460964        | ATP-binding cassette transporter subfamily B, member 1 (ABCB1)                                                                                                                                   | 1.93  | Up        |
| Bt.4209.1.S1_a_at     | CB534327        | Component 3                                                                                                                                                                                      | 1.89  | Up        |
| Bt.28048.1.S1_at      | CK945043        | Transcribed locus                                                                                                                                                                                | 1.82  | Up        |
| Bt.19204.1.S1_at      | CB458416        | Transcribed sequences                                                                                                                                                                            | 1.77  | Up        |
| Bt.23161.2.A1_at      | CB423642        | Heat shock 70 kD protein 2                                                                                                                                                                       | 1.77  | Up        |
| Bt.4137.1.A1_at       | CB443498        | Transcribed locus, moderately similar to XP_514164.1 similar to Putative lymphocyte G0/G1 switch protein 2 [Pan troglodytes]                                                                     | 1.77  | Up        |
| Bt.126.1.S2_at        | NM_174373       | potassium inwardly-rectifying channel, subfamily J, member 2                                                                                                                                     | 1.76  | Up        |
| Bt.21765.1.S1_at      | CB435377        | Transcribed locus, strongly similar to NP_067067.1 Ras-related GTP binding D [Homo sapiens]                                                                                                      | 1.76  | Up        |
| Bt.20512.1.S1_at      | BE758040        | Transcribed locus, weakly similar to NP_000486.1 collagen, type IV, alpha 5 (Alport syndrome) [Homo sapiens]                                                                                     | 1.75  | Up        |
| Bt.25111.1.A1_at      | CK848208        | Transcribed locus, weakly similar to XP_524747.1 similar to histocompatibility 28 [Pan troglodytes]                                                                                              | 1.73  | Down      |
| Bt.22976.1.S1_at      | AY298812        | SMC4 structural maintenance of chromosomes 4-like 1 (yeast)                                                                                                                                      | 1.69  | Up        |
| Bt.24033.1.A1_at      | CB432365        | Transcribed locus, moderately similar to XP_520524.1 similar to DEAD/H (Asp-Glu-Ala-Asp/His) box polypeptide RIG-I; RNA helicase; DEAD/H (Asp-Glu-Ala-Asp/His) box polypeptide [Pan troglodytes] | 1.67  | Down      |
| Bt.9385.1.S1_at       | CK953227        | Transcribed locus, moderately similar to XP_518477.1 similar to beta-tubulin cofactor C [Pan troglodytes]                                                                                        | 1.67  | Up        |
| Bt.16123.1.S1_at      | BM285504        | Transcribed locus, strongly similar to NP_005618.2 serum/glucocorticoid regulated kinase [Homo sapiens]                                                                                          | 1.66  | Up        |
| Bt.17670.1.A1_at      | CB439678        | Transcribed locus, strongly similar to NP_938022.1 hypothetical protein LOC285513 [Homo sapiens]                                                                                                 | 1.66  | Up        |
| Bt.29757.1.S1_s_at    | AJ235267        | T-cell receptor beta chain variable segment, clone IC100                                                                                                                                         | 1.65  | Up        |
| Bt.3566.1.A1_at       | AV615989        | Transcribed locus                                                                                                                                                                                | 1.64  | Up        |
| Bt.9673.1.S1_at       | CK972160        | Transcribed locus, strongly similar to XP_485628.1 similar to hypothetical protein MGC45416 [Mus musculus]                                                                                       | 1.63  | Down      |
| Bt.1978.13.S1_at      | D90132          | T cell receptor, beta cluster                                                                                                                                                                    | 1.62  | Up        |
| Bt.16333.1.A1_at      | CB420282        | Transcribed sequence with weak similarity to protein ref:NP_054886.1 (H.sapiens) HSPC128 protein (Homo sapiens)                                                                                  | 1.6   | Up        |
| Bt.16831.1.A1_at      | CB424072        | Transcribed sequence                                                                                                                                                                             | 1.6   | Up        |
| Bt.13469.1.S1_at      | CK771797        | Transcribed locus, moderately similar to NP_612441.1 serine dehydratase-like [Homo sapiens]                                                                                                      | 1.6   | Up        |
| Bt.28745.1.S1_at      | CK946910        | Transcribed locus, strongly similar to NP_005233.3 coagulation factor II (thrombin) receptor-like 1 [Homo sapiens]                                                                               | 1.59  | Up        |
| Bt.23226.1.S1_at      | BE237119        | Transcribed locus, moderately similar to NP_001600.1 acyl-Coenzyme A dehydrogenase, short/branched chain [Homo sapiens]                                                                          | 1.57  | Up        |
| Bt.29822.1.S1_s_at    | AB008649        | MHC class I heavy chain /// MHC class I heavy chain, partial cds, clone MP-1.6m                                                                                                                  | 1.57  | Down      |
| Bt.13003.2.S1_at      | D90013          | T cell receptor, alpha                                                                                                                                                                           | 1.56  | Up        |
| Bt.19365.1.S1_at      | CB459838        | Transcribed locus, moderately similar to NP_004122.1 granzyme B (granzyme 2, cytotoxic T-lymphocyte-associated serine esterase 1) [Homo sapiens]                                                 | 1.56  | Down      |
| Bt.13899.1.A1_at      | BF230904        | Transcribed locus, weakly similar to XP_346800.1 ectonucleotide pyrophosphatase/phosphodiesterase 2 [Rattus norvegicus]                                                                          | 1.56  | Down      |
| Bt.27854.2.S1_at      | AV604293        | Transcribed locus, strongly similar to NP_005375.1 nuclear factor, interleukin 3 regulated [Homo sapiens]                                                                                        | 1.55  | Up        |
| Bt.6389.1.A1_at       | BF041863        | Transcribed locus                                                                                                                                                                                | 1.54  | Down      |
| Bt.25275.1.A1_at      | CK727097        | Transcribed locus                                                                                                                                                                                | 1.54  | Up        |
| Bt.15788.3.S1_at      | CB422521        | Transcribed locus, weakly similar to NP_004326.1 bone marrow stromal cell antigen 2 [Homo sapiens]                                                                                               | 1.53  | Down      |
| Bt.25412.1.A1_at      | BE723538        | Transcribed locus, moderately similar to NP_060924.4 nucleolar and spindle associated protein 1 [Homo sapiens]                                                                                   | 1.53  | Up        |
| Bt.16141.1.S1_at      | CK778261        | Transcribed locus, strongly similar to XP_519864.1 similar to cyclin E2 isoform 1; G1/S-specific cyclin E2 [Pan troglodytes]                                                                     | 1.53  | Up        |
| Bt.29750.1.S1_x_at    | AJ006574        | T-cell receptor beta chain variable segment, clone C55                                                                                                                                           | 1.52  | Up        |
| Bt.16088.1.A1_at      | CK847994        | Transcribed locus, strongly similar to NP_061198.1 myosin VC [Homo sapiens]                                                                                                                      | 1.52  | Up        |
| Bt.9735.1.S1_at       | BM253121        | Transcribed locus, strongly similar to NP_061974.2 apolipoprotein M [Homo sapiens]                                                                                                               | 1.52  | Up        |
