# Supplementary material
Source: PubMed Central journal article supplement (PMC2646461)

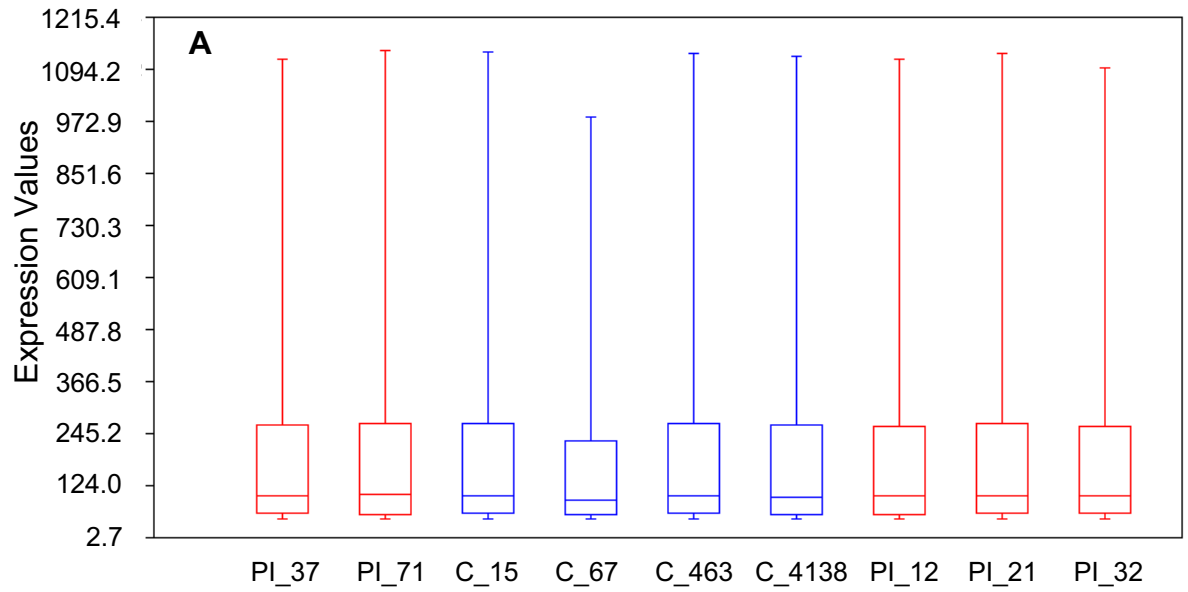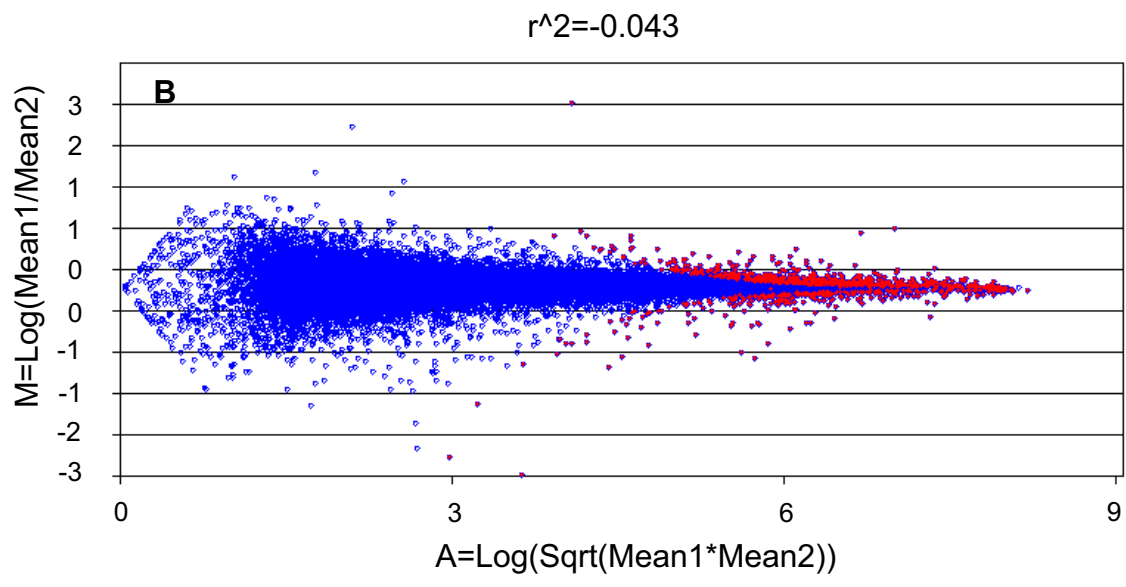

Supplement: 90276.2008_1.pdf [file 90276.2008_1.pdf]
